# Supplementary material for: Budget impact analysis of a home-based colorectal cancer screening programme in Malaysia
Source: PubMed Central journal article supplement (PMC10032398; doi:10.1136/bmjopen-2022-066925), 2023-03-21
Supplement: bmjopen-2022-066925.draft_revisions.pdf [file bmjopen-2022-066925.draft_revisions.pdf]

# BMJ Open

BMJ Open is committed to open peer review. As part of this commitment we make the peer review history of every article we publish publicly available.

When an article is published we post the peer reviewers' comments and the authors' responses online. We also post the versions of the paper that were used during peer review. These are the versions that the peer review comments apply to.

The versions of the paper that follow are the versions that were submitted during the peer review process. They are not the versions of record or the final published versions. They should not be cited or distributed as the published version of this manuscript.

BMJ Open is an open access journal and the full, final, typeset and author-corrected version of record of the manuscript is available on our site with no access controls, subscription charges or pay-per-view fees (<http://bmjopen.bmj.com>).

If you have any questions on BMJ Open's open peer review process please email [info.bmjopen@bmj.com](mailto:info.bmjopen@bmj.com)

# BMJ Open

## A budget impact analysis of a home-based colorectal cancer screening programme in Malaysia

|                               |                                                                                                                                                                                                                                                                                                                                                                                                                                                                                                                                                                                                                                                                                                                                                                                                                                            |
|-------------------------------|--------------------------------------------------------------------------------------------------------------------------------------------------------------------------------------------------------------------------------------------------------------------------------------------------------------------------------------------------------------------------------------------------------------------------------------------------------------------------------------------------------------------------------------------------------------------------------------------------------------------------------------------------------------------------------------------------------------------------------------------------------------------------------------------------------------------------------------------|
| Journal:                      | <i>BMJ Open</i>                                                                                                                                                                                                                                                                                                                                                                                                                                                                                                                                                                                                                                                                                                                                                                                                                            |
| Manuscript ID                 | bmjopen-2022-066925                                                                                                                                                                                                                                                                                                                                                                                                                                                                                                                                                                                                                                                                                                                                                                                                                        |
| Article Type:                 | Original research                                                                                                                                                                                                                                                                                                                                                                                                                                                                                                                                                                                                                                                                                                                                                                                                                          |
| Date Submitted by the Author: | 28-Jul-2022                                                                                                                                                                                                                                                                                                                                                                                                                                                                                                                                                                                                                                                                                                                                                                                                                                |
| Complete List of Authors:     | Ngan, Tran; Queen's University Belfast, Centre for Public Health<br>Ramanathan, Kogila; Monash University Malaysia, Global Public Health, Jeffrey Cheah School of Medicine and Health Sciences; Monash University Malaysia, South East Asia Community Observatory<br>Saleh, Muhamad; Monash University Malaysia, South East Asia Community Observatory<br>Schliemann, Desiree ; Queen's University Belfast, Centre for Public Health<br>Ibrahim Tamin, Nor Saleha ; Ministry of Health Malaysia<br>Su, Tin ; Monash University Malaysia, Global Public Health, Jeffrey Cheah School of Medicine and Health Sciences; Monash University Malaysia, South East Asia Community Observatory<br>Donnelly, Michael; Queen's University Belfast, Centre for Public Health<br>O'Neill, Ciaran; Queen's University Belfast, Centre for Public Health |
| Keywords:                     | Health economics < HEALTH SERVICES ADMINISTRATION & MANAGEMENT, Health policy < HEALTH SERVICES ADMINISTRATION & MANAGEMENT, Public health < INFECTIOUS DISEASES                                                                                                                                                                                                                                                                                                                                                                                                                                                                                                                                                                                                                                                                           |
|                               |                                                                                                                                                                                                                                                                                                                                                                                                                                                                                                                                                                                                                                                                                                                                                                                                                                            |

SCHOLARONE™  
Manuscripts

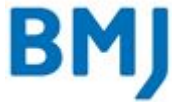

I, the Submitting Author has the right to grant and does grant on behalf of all authors of the Work (as defined in the below author licence), an exclusive licence and/or a non-exclusive licence for contributions from authors who are: i) UK Crown employees; ii) where BMJ has agreed a CC-BY licence shall apply, and/or iii) in accordance with the terms applicable for US Federal Government officers or employees acting as part of their official duties; on a worldwide, perpetual, irrevocable, royalty-free basis to BMJ Publishing Group Ltd ("BMJ") its licensees and where the relevant Journal is co-owned by BMJ to the co-owners of the Journal, to publish the Work in this journal and any other BMJ products and to exploit all rights, as set out in our [licence](#).

The Submitting Author accepts and understands that any supply made under these terms is made by BMJ to the Submitting Author unless you are acting as an employee on behalf of your employer or a postgraduate student of an affiliated institution which is paying any applicable article publishing charge ("APC") for Open Access articles. Where the Submitting Author wishes to make the Work available on an Open Access basis (and intends to pay the relevant APC), the terms of reuse of such Open Access shall be governed by a Creative Commons licence – details of these licences and which [Creative Commons](#) licence will apply to this Work are set out in our licence referred to above.

Other than as permitted in any relevant BMJ Author's Self Archiving Policies, I confirm this Work has not been accepted for publication elsewhere, is not being considered for publication elsewhere and does not duplicate material already published. I confirm all authors consent to publication of this Work and authorise the granting of this licence.

1  
2  
3 **A budget impact analysis of a home-based colorectal cancer screening**  
4 **programme in Malaysia**  
5  
6  
7

8  
9 Tran Thu Ngan<sup>1\*</sup>, Kogila Ramanathan<sup>2,3</sup>, Muhamad Raziq Bin Mohd Saleh<sup>3</sup>, Désirée  
10 Schliemann<sup>1</sup>, Nor Saleha Binti Ibrahim Tamin<sup>4</sup>, Tin Tin Su<sup>2,3</sup>, Michael Donnelly<sup>1</sup>, Ciaran  
11 O'Neill<sup>1</sup>  
12  
13  
14

15  
16 <sup>1</sup> *Centre for Public Health, Queen's University Belfast, Belfast, UK*

17  
18 <sup>2</sup> *Global Public Health, Jeffrey Cheah School of Medicine and Health Sciences, Monash*  
19 *University Malaysia, Selangor, Malaysia*  
20  
21

22  
23 <sup>3</sup> *South East Asia Community Observatory (SEACO), Jeffrey Cheah School of Medicine and*  
24 *Health Sciences, Monash University Malaysia*  
25  
26

27  
28 <sup>4</sup> *Ministry of Health Malaysia, Putrajaya, Malaysia*  
29  
30

31  
32 \* Correspondence to:

33  
34 Tran Thu Ngan, PhD

35  
36 Postal address: Centre for Public Health, Queen's University Belfast, Belfast, United Kingdom

37  
38 Email: [n.t.tran@qub.ac.uk](mailto:n.t.tran@qub.ac.uk)  
39  
40  
41  
42

43  
44 ORCID of the authors

45  
46 Tran Thu Ngan : 0000-0003-2771-9878

47  
48 Désirée Schliemann : 0000-0002-8746-3002

49  
50 Ciaran O'Neill : 0000-0001-7668-3934  
51  
52  
53  
54  
55  
56  
57  
58  
59  
60

# 1 A budget impact analysis of a home-based colorectal cancer screening 2 programme in Malaysia

## 3 4 **Abstract**

5 **Objectives:** The 2020-2022 research project ‘Colorectal Cancer Screening Intervention for  
6 Malaysia’ (CRC-SIM) evaluated the implementation of a home-based CRC screening pilot in  
7 Segamat District. This budget impact analysis (BIA) assessed the expected changes in health  
8 expenditure of the Malaysian Ministry of Health budget in the scenario where the pilot  
9 programme was implemented nationwide versus current opportunistic screening.

10 **Methods:** Assumptions and costs in the opportunistic and novel CRC screening scenarios were  
11 derived from a previous evaluation of opportunistic CRC screening in community health clinics  
12 across Malaysia and the CRC-SIM research project, respectively. The BIA was conducted from  
13 the viewpoint of the federal government and estimated the annual financial impact over a  
14 period of five years.

15 **Results:** The total annual cost of the current practice of opportunistic screening was  
16 RM1,584,321 of which 80% (RM1,274,690) was expended on the provision of opportunistic  
17 CRC to adults who availed of the service. Regarding the implementation of national CRC  
18 screening programme, the net budget impact in the 1<sup>st</sup> year was estimated to be RM107,631,959  
19 and to reach RM148,485,812 in the 5<sup>th</sup> year based on an assumed increased uptake of 5%  
20 annually. The costs were calculated to be sensitive to the probability of adults who were  
21 contactable, eligible, and agreeable to participating in the programme.

22 **Conclusions:** The findings highlighted the net budget impact of implementing a population-  
23 based national CRC screening programme in Malaysia. Together with the modelling  
24 estimations, the results illustrate how a BIA may be used to improve informed decision-making  
25 by health authorities about the affordability of programme implementation as well as aid  
26 budgetary planning and decisions generally about implementation.

27  
28 **Keywords:** Colorectal cancer screening, budget impact analysis, home-based testing, global  
29 health, Malaysia

### Strengths and limitations of this study

- A budget impact analysis (BIA) aids decision making by health service planners and commissioners about whether an intervention or programme is affordable within given budget constraints
- BIA and its pragmatic approach is an ideal method when a situation calls for an evaluation of 'affordability' which is of central importance in low and middle income countries (LMICs)
- A BIA is not intended to provide answers to questions about whether or not the screening programme is good value for money (which can be answered by cost-effectiveness analysis)

## INTRODUCTION

Colorectal cancer (CRC) has the second highest incidence and mortality rate among all types of cancer in both sexes in Malaysia.<sup>1</sup> The age standardised incidence rate in 2012-2016 was 14.8 per 100,000 males and 11.1 per 100,000 females which appears to be stable compared to 2007-2011.<sup>2</sup> In contrast, the proportion of CRC patients who are diagnosed at a late stage (i.e., stage III or IV) is increasing. The proportion of males with late stage CRC increased from 65.9% during 2007-2011 to 72.4% during 2012-2016; and from 65.2% to 73.1% for females.<sup>2</sup> Late stage diagnosis negatively impacts survival rate; thus, it is unsurprising that the 5-year survival of CRC patients in Malaysia is much lower compared to high-income countries (e.g., less than 50% of Malaysians compared to 92% of the population in the United States).<sup>3 4</sup> Improved survival can be achieved by early detection through screening and the removal of premalignant polyps.<sup>4</sup> However, Malaysia currently does not have a population-based national CRC screening programme.

The Ministry of Health of Malaysia (MoHM) adopted the use of immunochemical faecal occult blood test (iFOBT) for opportunistic CRC screening at public health clinics since 2014.<sup>5</sup> MoHM guidelines recommend screening for asymptomatic individuals aged 50-75 years old with average risk of CRC.<sup>6</sup> The uptake of this opportunistic screening tends to be very low. For

1  
2  
3 49 example, the annual average uptake during 2014-2018 was 0.5% while the 5-year cumulative  
4  
5 50 uptake was 2.29 %.<sup>5</sup> Home-based iFOBT has been implemented in many high-income  
6  
7 51 countries (HICs) to improve the accessibility and uptake of CRC screening.<sup>7</sup> In this context,  
8  
9 52 the Southeast Asia Community Observatory (SEACO) at Monash University Malaysia and  
10  
11 53 Queen's University Belfast (Northern Ireland) collaborated to conduct the research project,  
12  
13 54 'Colorectal Cancer Screening Intervention for Malaysia' (CRC-SIM) in 2020-2022. This  
14  
15 55 project evaluated the implementation of a home-based CRC screening pilot in Segamat District.  
16  
17 56 The uptake of the novel screening programme was 22%. The significantly higher uptake  
18  
19 57 indicates the potential population wide impact if this screening approach (i.e., using home-  
20  
21 58 based iFOBT and self-reporting test results) was scaled up. However, in order to aid public  
22  
23 59 health decision making, there is a need to model a scaled-up version of the research-tested  
24  
25 60 screening programme and, more specifically, gather insights about the total costs of programme  
26  
27 61 implementation and how it might impact the MoHM budget. Therefore, this budget impact  
28  
29 62 analysis (BIA) assessed the expected changes in the health expenditure of MoHM budget as a  
30  
31 63 result of implementing a population-based national CRC screening programme versus current  
32  
33 64 opportunistic screening (or 'usual care'). It assessed the affordability of the screening  
34  
35 65 programme given potential budget constraints.  
36  
37  
38  
39  
40  
41  
42

## 43 66 **METHODS**

44  
45  
46 67 The conduct of this BIA and presentation of this paper followed the guidelines developed by  
47  
48 68 the International Society for Pharmacoeconomics and Outcomes Research (ISPOR) Task  
49  
50 69 Force.<sup>8 9</sup> All costs are presented in local currency -the Malaysian Ringgit (RM)- and  
51  
52 70 International Dollar (I\$). RM was converted to I\$ using purchasing power parity (PPP)  
53  
54 71 conversion factors instead of market exchange rates.  
55  
56  
57  
58  
59  
60

## 72 **Health service under assessment and its comparator**

73 The specific health service that was the focus of the BIA was a population-based screening  
74 programme for colorectal cancer using a self-rapid response iFOBT. The comparator was  
75 current or 'usual care' - opportunistic screening.

76

77 The BIA is predicated on the opportunistic screening programme being replaced by the new  
78 population-based screening programme (i.e., the two programmes would not be run in  
79 conjunction or in other words, the two scenarios in assessment are mutually exclusive). In each  
80 scenario, the patient pathway from the point when patients were invited for screening to receipt  
81 of a definitive diagnosis were identified and described. The screening procedure ends at the  
82 point of a patient receiving their iFOBT result with encouragement to attend hospital for a  
83 colonoscopy (if iFOBT is positive). It is important to note that the BIA included costs of  
84 screening and diagnosis (e.g., colonoscopy, biopsy) but not treatment. The BIA also did not  
85 address issues with respect to equity of access and uptake of services in either screening  
86 scenarios.

87

88 The patient pathways for the 'usual care' practice and the novel CRC screening programme are  
89 presented in Figure 1 and 2, respectively. In opportunistic screening practice, it is recommended  
90 or expected that individuals who are aged 50-75 years will be screened for CRC symptoms  
91 when they attend their local health clinic (for any health condition or problem). If they are  
92 asymptomatic and have an average risk of having CRC (based on family history), they are  
93 offered an iFOBT, followed by a colonoscopy if the iFOBT test was positive. If CRC is  
94 detected following a colonoscopy, the result is conveyed to a patient along with an explanation  
95 of the treatment plan or referral arrangement.

96 (Figure 1 is about here)



1  
2  
3 97 Details of the home-based screening intervention in CRC-SIM were published elsewhere.<sup>10</sup>  
4  
5 98 Briefly, in the novel CRC screening programme, individuals aged 50-75 years were contacted,  
6  
7  
8 99 checked for eligibility, and invited to participate. A home-screening 'pack' was posted to  
9  
10 100 eligible participants followed by two reminders. The test was performed at home by  
11  
12 101 participants who took a photograph of the completed test and texted it to trained medical  
13  
14 102 professionals who interpreted the photograph. Participants with positive iFOBT were referred  
15  
16  
17 103 for a colonoscopy at hospital.

18  
19 104 (Figure 2 is about here)

20  
21 105 There were two main differences between these patient pathways. Firstly, individuals within  
22  
23 106 the target age group for screening were contacted directly and invited to participate in the novel  
24  
25 107 CRC screening programme while in the situation of 'usual care', CRC screening was offered  
26  
27 108 (if screening guideline recommendations were followed) only when members of the target  
28  
29 109 group visited their clinic for some other health condition or problem. Secondly, the iFOBT was  
30  
31 110 performed by doctors at health clinics in the 'usual care' pathway while in the novel CRC  
32  
33 111 screening programme, participants self-tested in their home. Home-based testing generated  
34  
35 112 additional stages in the pathways in relation to sending a test, reminding participants, taking a  
36  
37 113 photo of a completed test, and sending it to programme officers and vice versa. The remaining  
38  
39 114 stages of each pathway (e.g., being screened for eligibility, receiving a colonoscopy, and  
40  
41 115 receiving a treatment plan) were the same across the two scenarios.  
42  
43  
44  
45  
46

### 47 116

### 48

### 49 117 **Eligible population and input assumptions**

50  
51 118 The target population for current opportunistic screening in Malaysia is individuals aged 50-  
52  
53 119 75 years, regardless of sex. Due to the nature of home-based screening, the target population  
54  
55 120 for the CRC screening programme was required to meet some additional inclusion criteria as  
56  
57  
58  
59  
60

1  
2  
3 121 presented in Figure 2. The number of individuals who presented and completed each stage was  
4  
5 122 estimated using input assumptions.  
6  
7  
8 123

9  
10 124 Data about the population of Malaysia by age was taken from government reports (i.e.,  
11  
12 125 Department of Statistics, Malaysia) and from World Population Review. The total population  
13  
14 126 was reported to be 32,676,786 in 2021, of which, 19% or 6,228,195 were aged 50-75 years  
15  
16  
17 127 old.<sup>11 12</sup>  
18

19 128  
20  
21 129 **In the ‘usual care’ – opportunistic screening pathway or scenario**, all assumptions were  
22  
23 130 derived from a study by Tamin NSI (2020) which was a 5-year evaluation of opportunistic CRC  
24  
25 131 screening (and the use of stool-based tests) in community health clinics across Malaysia.<sup>5</sup> It was  
26  
27 132 assumed that 0.482% of the eligible population would avail of CRC screening when they  
28  
29 133 attended local health clinics for other conditions; and 9.21% of this proportion of tested patients  
30  
31 134 would receive a positive result. Only 55.9% of patients in the study by Tamin availed of a  
32  
33 135 colonoscopy after a positive iFOBT. CRC detection after colonoscopy investigation was 4.04%.  
34  
35  
36 136

37  
38  
39 137 **In the novel CRC screening programme**, all assumptions were derived from the CRC-SIM  
40  
41 138 research project. It was assumed that 50.51% of the eligible population would be contactable  
42  
43 139 and meet all inclusion criteria to participate in the home-based screening programme; 52.27%  
44  
45 140 of people who were eligible would agree to participate; 41.63% would perform the iFOBT and  
46  
47 141 send a photo of a completed test to the programme officers; 18.01% of people who would be  
48  
49 142 tested would receive a positive result; 41.07% would avail of colonoscopy after a positive  
50  
51 143 iFOBT result; and CRC detection after colonoscopy investigation would be 4.35%.  
52  
53  
54 144

55  
56  
57  
58  
59  
60

1  
2  
3 145 Table 1 summarises details about the input assumptions that were used to estimate the number  
4  
5 146 of individuals at each stage of the respective pathway: the opportunistic screening pathway and  
6  
7 147 the CRC screening programme pathway.  
8  
9

10 148

11  
12 149 **Table 1: Input assumptions used to estimate the population at each stage of the patient**  
13  
14  
15 150 **pathways**

| Stage in pathway                                                                                           | Opportunistic screening scenario<br>(Current practice) |                    | Population-based CRC programme screening scenario<br>(Proposed practice) |                    |
|------------------------------------------------------------------------------------------------------------|--------------------------------------------------------|--------------------|--------------------------------------------------------------------------|--------------------|
|                                                                                                            | Assumption*                                            | No. of individuals | Assumption**                                                             | No. of individuals |
| Total population (all ages)                                                                                | NA                                                     | 32,676,786         | NA                                                                       | 32,676,786         |
| Target population (aged 50-75)                                                                             | 19.06%                                                 | 6,228,195          | 19.06%                                                                   | 6,228,195          |
| Eligible population (met all inclusion criteria)                                                           | 100%                                                   | 6,228,195          | 50.51%                                                                   | 3,146,020          |
| Availed of/agreed to take CRC screening                                                                    | 0.482%                                                 | 30,020             | 52.27%                                                                   | 1,644,561          |
| Needed 1 <sup>st</sup> reminder to return the iFOBT result (among those agreed to participate)             | NA                                                     | NA                 | 78.71%                                                                   | 1,294,514          |
| Needed 2 <sup>nd</sup> reminder to return the iFOBT result (among those received 1 <sup>st</sup> reminder) | NA                                                     | NA                 | 88.10%                                                                   | 1,140,405          |
| Returned iFOBT result (among those agreed to participate)                                                  | 100%                                                   | 30,020             | 41.63%                                                                   | 684,683            |
| Received iFOBT positive result                                                                             | 9.21%                                                  | 2,765              | 18.01%                                                                   | 123,287            |
| Availed of colonoscopy after positive iFOBT                                                                | 55.9%                                                  | 1,546              | 41.07%                                                                   | 50,636             |
| CRC detection after colonoscopy investigation                                                              | 4.04%                                                  | 62                 | 4.35%                                                                    | 2,202              |

51 *CRC: Colorectal cancer; iFOBT: Immunochemical faecal occult blood test; NA: Not applicable; No: Number*

52 \* *The assumptions were derived from a study of Tamin NSI (2020) which was a 5-year evaluation of using stool-based test for opportunistic CRC screening in primary health institutions across Malaysia <sup>5</sup>.*

53  
54  
55 \*\* *The assumptions were derived from the Colorectal Cancer Screening Intervention for Malaysia (or CRC-SIM research project) in Segamat District, conducted by Queen's University Belfast, Monash University, and Southeast Asia Community Observatory (SEACO) in 2021.*

58 151

1  
2  
3 152 **Cost input and data sources**  
4

5 153 In the opportunistic screening scenario, the total cost comprised the cost of:  
6

7 154 (i) performing screening (e.g., asking for symptoms, family history, and collecting the sample)  
8

9 155 (ii) processing stool specimens  
10

11 156 (iii) interpreting test results and  
12

13 157 (iv) conveying a definitive diagnosis to patients (include explaining treatment plan or referral  
14

15 158 arrangements)  
16

17 159  
18

19 160 In the CRC programme screening scenario, the total cost comprised the costs of:  
20

21 161 (i) contacting potential participants  
22

23 162 (ii) delivering iFOBT test kits (including cost of the test, postage, print materials, and sending  
24

25 163 video instruction)  
26

27 164 (iii) sending a reminder to participants (up to 2 times, by text message and phone call)  
28

29 165 (iv) interpreting and conveying results to participants and  
30

31 166 (v) following-up patients with positive iFOBT but did not take colonoscopy in order to  
32

33 167 encourage them to avail of the colonoscopy  
34

35 168  
36

37 169 These costs were calculated by multiplying the time allocated for the completion of each task  
38

39 170 with the salary cost of the person who undertakes each task plus cost of consumables. Table 2  
40

41 171 shows the unit cost for each cost element, related assumptions, and data sources.  
42

43 172  
44

45 173  
46  
47  
48  
49  
50  
51  
52  
53  
54  
55  
56  
57  
58  
59  
60

174 **Table 2: Resources and unit costs**

Currency: Malaysian ringgit (RM)

| Cost element                                                                                         | Unit cost<br>(Per screen)<br>RM (I\$) | Assumptions                                                 | Source |
|------------------------------------------------------------------------------------------------------|---------------------------------------|-------------------------------------------------------------|--------|
| <b><i>Current practice (opportunistic screening)</i></b>                                             |                                       |                                                             |        |
| Performing screening (asking for symptoms, family history, referral) and taking sample               | 5.58                                  | 20 min x salary RM2947/month                                | 1      |
| Processing stool specimens                                                                           | 1.70                                  | 10 min x salary RM1797/month                                | 2      |
| Interpreting the test results                                                                        | 2.79                                  | 10 min x salary RM2947/month                                | 1      |
| Conveying a definitive diagnosis to patients (along with explaining treatment plan or referral etc.) | 8.37                                  | 30 min x salary RM2947/month                                | 1      |
| <b><i>Proposed practice (Population-based CRC screening programme)</i></b>                           |                                       |                                                             |        |
| Contact eligible individuals - agreed to participate                                                 | 0.98                                  | 7.1 min x (salary RM1440/month + mobile package RM20/month) | 3      |
| Contact eligible individuals - rejected/excluded to participate                                      | 0.47                                  | 3.4 min x (same as above)                                   | 3      |
| iFOBT rapid test kit                                                                                 | 6.90                                  |                                                             | 3      |
| Print materials (instruction leaflet, explanatory statement)                                         | 1.10                                  | 90 cents for colour print + 20 cent for black & white print | 3      |
| Postage (stamps, etc.)                                                                               | 5.35                                  |                                                             | 3      |
| Sending video through WhatsApp                                                                       | 0.41                                  | 3 min x (salary RM1440/month + mobile package RM20/month)   | 3      |
| Sending reminder text message                                                                        | 0.41                                  | 3 min x (same as above)                                     | 3      |
| Reminder call                                                                                        | 0.28                                  | 2 min x (same as above)                                     | 3      |
| Interpreting the test kit result                                                                     | 1.70                                  | 10 min x salary RM1797/month                                | 3      |
| Sending text message to inform patient of negative result                                            | 0.45                                  | 2 min x (salary RM2350/month + mobile package RM20/month)   | 3      |
| Calling patient to inform him/her of positive result                                                 | 0.67                                  | 3 min x (same as above)                                     | 3      |
| Preparing and sending referral letter to patient/clinic                                              | 1.12                                  | 5 min x (same as above)                                     | 3      |
| Follow up effort                                                                                     | 6.73                                  | 30 min x (same as above)                                    | 3      |
| Developing communication materials, <b>one-off cost</b>                                              | 6,063                                 | Communication materials do not change in 5 years            | 3      |

Currency: Malaysian ringgit (RM)

| Cost element                                                                                                                                                                                                                      | Unit cost<br>(Per screen)<br>RM (I\$) | Assumptions                                                                                                                                                                                                                                            | Source |
|-----------------------------------------------------------------------------------------------------------------------------------------------------------------------------------------------------------------------------------|---------------------------------------|--------------------------------------------------------------------------------------------------------------------------------------------------------------------------------------------------------------------------------------------------------|--------|
| Training for data collectors*, <b>one-off cost</b><br><i>* Data collectors are those employed by the programme to (i) contact potential participants, (ii) deliver iFOBT test kits, and (iii) send a reminder to participants</i> | 109,703                               | + 1 day training (virtual using Zoom)<br>+ 1 trainer for maximum 25 trainees<br>+ 1 data collector* is needed for every target population of 400<br>+ Cost=1-day-salary of trainer/trainees x number of trainer/trainees<br>+ No retraining in 5 years | 3      |
| <b>Same in both scenarios/practices</b>                                                                                                                                                                                           |                                       |                                                                                                                                                                                                                                                        |        |
| Colonoscopy (including polyps removal and/or biopsy if needed)                                                                                                                                                                    | 200                                   |                                                                                                                                                                                                                                                        |        |
| Consumables – stool container, gloves, mask, plastic waste bag and disposal of materials from the test                                                                                                                            | 10.80                                 | RM8636.7/800 sets                                                                                                                                                                                                                                      | 3      |

*iFOBT: Immunochemical faecal occult blood test; RM: Malaysian ringgit*

Source:

1. Public Services Commission of Malaysia. Medical Officer Grade UD41. Accessed at <https://www.spa.gov.my/spa/laman-utama/gaji-syarat-lantikan-deskripsi-tugas/ijazah-sarjana-phd/pegawai-perubatan-gred-ud41>
2. Public Services Commission of Malaysia. Medical laboratory technologist Grade U29. Accessed at [https://www.interactive.jpa.gov.my/ezskim/klasifikasi/perbikalanskim.asp?id\\_skim=3LU03](https://www.interactive.jpa.gov.my/ezskim/klasifikasi/perbikalanskim.asp?id_skim=3LU03)
3. Colorectal Cancer Screening Intervention for Malaysia (or CRC-SIM research project) in Segamat District, conducted by Queen's University Belfast, Monash University, and Southeast Asia Community Observatory (SEACO) in 2021

175

176 In the current practice of opportunistic screening, doctors were consulted about the estimated  
177 time to perform each stage in the pathway. The monthly salary of a general doctor and a medical  
178 laboratory technologist was based on the rate published by the Public Services Commission of  
179 Malaysia.<sup>13 14</sup> These rates were RM2,947 (~I\$2,045) and RM1,797 (~I\$1,247), respectively.

180 In the novel CRC screening programme, the time to perform each stage in the pathway, salary  
181 of personnel, and costs of material resources (e.g., rapid kit test, consumables, postage, printing  
182 materials) were based on the time and expenditure observed in the CRC-SIM research project.  
183 All costs were calculated per screen except the cost of training and the cost of developing  
184 communication materials which were one-off costs based on the assumption that  
185 communication materials would not change, and no re-training would be needed within 5 years.

1  
2  
3 186 It was assumed (based on the experience of operating the screening programme during the  
4  
5 187 CRC-SIM project) that one data collector (i.e., those employed by the programme to (i) contact  
6  
7 188 potential participants, (ii) deliver iFOBT test kits, and (iii) send a reminder to participants)  
8  
9  
10 189 would be needed for every 400 people in the target population. Training would last one day  
11  
12 190 and would be delivered virtually; thus, the cost of training equalled (1-day-salary of trainer x  
13  
14 191 number of trainer) + (1-day-salary of trainees x number of trainees/data collectors).  
15  
16  
17 192

### 19 193 **Perspective and time horizon**

21 194 The BIA was conducted from the viewpoint of the federal government which finances  
22  
23 195 Malaysia's public health system.<sup>15</sup> Only those costs and resource requirements relevant to the  
24  
25 196 budget holder were included in the analysis. For example, the out-of-pocket expenditure  
26  
27 197 incurred by patients were excluded.  
28  
29  
30 198

31  
32  
33 199 The analysis estimated the annual financial impact over a period of five years as recommended  
34  
35 200 in the guidelines.<sup>9</sup> <sup>16</sup> Costs were not discounted given that the BIA methodology reports the  
36  
37 201 costs for each year in which they occur rather than a net present value.<sup>9</sup>  
38  
39  
40 202

### 41 203 **Budget impact analyses**

#### 42 204 *Computing framework and base-case analysis*

43  
44  
45 205 The BIA used a cost calculator programmed in Microsoft Excel, following the costing template<sup>1</sup>  
46  
47 206 produced by the National Institute for Health and Care Excellence in the UK (NICE). The template  
48  
49 207 was modified to fit the programme under assessment. The cost calculator approach is  
50  
51 208 recommended by guidelines as it is easy for stakeholders to understand and replicate the results.<sup>9</sup>  
52  
53  
54  
55  
56  
57

---

58  
59 <sup>1</sup> The template can be freely downloaded at <https://www.nice.org.uk/Media/Default/About/what-we-do/our-programmes/evidence-standards-framework/budget-impact-template.xlsx>  
60

1  
2  
3 209 First, the number of individuals who completed each stage was estimated (Table 1). The  
4  
5 210 resources that were used at each stage of the respective pathways (in opportunistic screening  
6  
7 211 and the novel CRC screening programme) were listed along with their unit costs (i.e., cost of  
8  
9 212 each resource per person) (Table 2). Unit costs were multiplied by number of users to give the  
10  
11 213 total cost of resources for each scenario. The net budget impact was calculated as the difference  
12  
13 214 in cost between opportunistic screening and the CRC screening programme. Visual depiction  
14  
15 215 of the cost calculator is shown in Supplementary Material, Figure S1.  
16  
17  
18  
19  
20

21  
22  
23

### 217 *Uncertainty and scenario analyses*

24 218 The input assumptions (that were used to estimate the number of individuals at each stage of  
25  
26 219 the respective pathway) and the cost inputs were varied, and then the impact of these changes  
27  
28 220 in relation to the results was analysed to investigate the sensitivity of the budget impact results  
29  
30 221 to variations in individual input. As recommended by Gray et al. (2011), the range of variation  
31  
32 222 regarding parameters for which data sources about dispersion were unavailable were  $\pm 20\%$  of  
33  
34 223 the base case.<sup>17</sup>  
35  
36  
37  
38  
39

40  
41

### 42 **Patient and public involvement**

43 226 It was not appropriate or possible to involve patients or the public in the design, or conduct, or  
44  
45 227 reporting, or dissemination plans of our research as this type of study is a secondary analysis  
46  
47 228 of data from a payer perspective (Ministry of Health Malaysia).  
48  
49  
50  
51  
52  
53  
54  
55  
56  
57  
58  
59  
60

229



1  
2  
3 230 **RESULTS**  
4  
5

6 231 **Base-case analysis**  
7

8 232 The total annual cost of the current practice of opportunistic screening is RM1,584,321  
9  
10 233 (~I\$1,099,460), of which 80% (RM1,274,690 ~ I\$884,587) was for providing opportunistic  
11  
12 234 CRC to adults who availed of the service. Costs of providing colonoscopy (including polyps  
13  
14 235 removal and/or biopsy if needed) after receipt of a positive iFOBT and conveying definitive  
15  
16 236 diagnosis to patients (along with explaining treatment plan or referral etc.) after the outcome  
17  
18 237 of the colonoscopy were RM309,108 (~I\$214,509) and RM523 (~I\$363), respectively.  
19  
20  
21  
22  
23

24 239 The total annual cost over a 5-year period of the proposed practice (i.e., CRC screening  
25  
26 240 programme) is shown in Table 3. It was assumed that the number of people who would agree  
27  
28 241 to participate in the programme would increase by 5% each year (in consideration of health  
29  
30 242 promotion activities as well as information flows including word of mouth between  
31  
32 243 participants). Therefore, the financial impact would also increase accordingly.  
33  
34  
35  
36  
37  
38  
39  
40  
41  
42  
43  
44  
45  
46  
47  
48  
49  
50  
51  
52  
53  
54  
55  
56  
57  
58  
59  
60

246 **Table 3: Annual cost of proposed practice (i.e., CRC screening programme)**

*Currency: Malaysian ringgit (RM) and International Dollar (I\$)*

| <b>Proposed practice</b>                                                                                                      | <b>Year 1</b><br>RM (I\$)          | <b>Year 2</b><br>RM (I\$)          | <b>Year 3</b><br>RM (I\$)          | <b>Year 4</b><br>RM (I\$)          | <b>Year 5</b><br>RM (I\$)           |
|-------------------------------------------------------------------------------------------------------------------------------|------------------------------------|------------------------------------|------------------------------------|------------------------------------|-------------------------------------|
| Contacting adults who are eligible for CRC screening programme (i.e., aged 50-75) and screen for eligibility of participating | 2,320,148<br>(1,610,096)           | 2,320,148<br>(1,610,096)           | 2,320,148<br>(1,610,096)           | 2,320,148<br>(1,610,096)           | 2,320,148<br>(1,610,096)            |
| Providing iFOBT test to adults who agreed to participate in CRC screening programme after being invited                       | 93,654,886<br>(64,992,981)         | 102,612,907<br>(71,209,512)        | 111,570,928<br>(77,426,043)        | 120,528,949<br>(83,642,574)        | 129,486,970<br>(89,859,105)         |
| Providing 1 <sup>st</sup> reminder to participants                                                                            | 536,929<br>(372,609)               | 588,286<br>(408,248)               | 639,643<br>(443,888)               | 690,999<br>(479,527)               | 742,356<br>(515,167)                |
| Providing 2 <sup>nd</sup> reminder to participants                                                                            | 315,339<br>(218,833)               | 345,501<br>(239,765)               | 375,663<br>(260,696)               | 405,825<br>(281,627)               | 435,987<br>(302,559)                |
| Interpreting returned iFOBT samples                                                                                           | 1,165,129<br>(808,556)             | 1,276,572<br>(885,893)             | 1,388,016<br>(963,231)             | 1,499,460<br>(1,040,569)           | 1,610,903<br>(1,117,906)            |
| Conveying result through message to participants with iFOBT negative result                                                   | 251,990<br>(174,872)               | 276,093<br>(191,598)               | 300,196<br>(208,324)               | 324,298<br>(225,050)               | 348,401<br>(241,777)                |
| Preparing and sending referral letter and calling participants with iFOBT POSITIVE result                                     | 221,356<br>(153,613)               | 242,529<br>(168,306)               | 263,701<br>(182,999)               | 284,874<br>(197,692)               | 306,046<br>(212,384)                |
| Following up participants who DID NOT take colonoscopy after positive iFOBT                                                   | 489,158<br>(339,457)               | 535,945<br>(371,926)               | 582,733<br>(404,394)               | 629,520<br>(436,863)               | 676,308<br>(469,332)                |
| Providing colonoscopy (including polyps removal and/or biopsy if needed) to participants with positive iFOBT                  | 10,127,147<br>(7,027,861)          | 11,095,801<br>(7,700,070)          | 12,064,455<br>(8,372,280)          | 13,033,109<br>(9,044,489)          | 14,001,764<br>(9,716,700)           |
| Conveying definitive diagnosis to patients (along with explaining treatment plan or referral etc.) after the colonoscopy      | 18,432<br>(12,791)                 | 20,195<br>(14,015)                 | 21,958<br>(15,238)                 | 23,721<br>(16,461)                 | 25,484<br>(17,685)                  |
| Capital costs (Developing communication materials + Training for data collectors)                                             | 115,766<br>(80,337)                | 115,766<br>(80,337)                | 115,766<br>(80,337)                | 115,766<br>(80,337)                | 115,766<br>(80,337)                 |
| <b>Total cost of proposed practice</b>                                                                                        | <b>109,216,279</b><br>(75,792,005) | <b>119,429,743</b><br>(82,879,766) | <b>129,643,206</b><br>(89,967,527) | <b>139,856,670</b><br>(97,055,288) | <b>150,070,133</b><br>(104,143,049) |

*CRC: Colorectal cancer; iFOBT: Immunochemical faecal occult blood test*

1  
2  
3 248 Similar to opportunistic screening, the cost to provide iFOBT to the eligible population who availed  
4  
5 249 of the service accounted for 86% of the total cost of the proposed CRC screening programme. The  
6  
7 250 second most costly component was the provision of colonoscopy (including polyps removal and/or  
8  
9 251 biopsy if needed) to patients with an iFOBT positive result, at 9% of the total cost. The remaining  
10  
11 252 nine cost components such as contacting potential participants, reminding participants to send  
12  
13 253 photograph of iFOBT result, conveying diagnosis to participants and the follow-up effort added  
14  
15 254 only up to 5% of the total cost.  
16  
17  
18  
19  
20

21 256 The net budget impact in the 1<sup>st</sup> year of implementing CRC screening programme would be  
22  
23 257 RM107,631,959 (~I\$74,692,546 which equalled the total cost of future practice minus the total  
24  
25 258 cost of current practice). The impact increases each year as the number of people who agree to  
26  
27 259 participate in the programme increase, reaching RM117,845,422 (~I\$81,780,307) in year 2,  
28  
29 260 RM128,058,885 (~I\$88,868,067) in year 3, RM138,272,349 (~I\$ 95,955,829) in year 4, and  
30  
31 261 RM148,485,812 (~I\$103,043,589) in year 5.  
32  
33  
34  
35  
36

37 262  
38 263 The net budget impact of providing and delivering the CRC screening programme over the 5-year  
39  
40 264 timeframe for each state in Malaysia (calculated according to the population size of each state) can  
41  
42 265 be accessed in Supplementary Material, Table S1. These estimates aid service planning decisions  
43  
44 266 if the novel pilot programme is implemented in one or more of these states before being scaled up  
45  
46 267 into nationwide programme.  
47  
48  
49  
50

## 51 269 **Uncertainty and scenario analyses**

52  
53 270 The tornado diagram in Figure 3 shows the change to net budget impact when assumptions and  
54  
55 271 cost inputs were varied. It presents the results of multiple univariate sensitive analyses on key  
56  
57 272 inputs that exert the most influence on the net budget impact. These inputs include the probability  
58  
59  
60

1  
2  
3 273 of (i) making successful contact with adults about the CRC screening programme, (ii) adults  
4  
5 274 agreeing to participate, (iii) adults being eligible to participate in the programme, and (iv) the  
6  
7  
8 275 cost of consumables that are required to take a stool sample. The first three inputs influence the  
9  
10 276 number of individuals who are present at each stage of the patient pathway.

11  
12 277 (Figure 3 is about here)

13  
14 278 The net budget impact would increase from RM107 million to RM130 million (~I\$74-90  
15  
16 279 million) if there was a 20% increase in (i) the probability of adults who were contactable (from  
17  
18 280 a contact list of people aged 50-75 years old) or (ii) the probability of adults agreeing to  
19  
20 281 participate in the CRC screening programme or (iii) the probability of adults being eligible for  
21  
22 282 the programme (i.e., aged 50-75 years old; having no symptoms of CRC, a smartphone, and  
23  
24 283 WhatsApp; resident within programme area; and did not have colonoscopy this year). In other  
25  
26 284 words, a 20% increase in each one of these factors would require an additional RM23 million  
27  
28 285 (~I\$16 million) to be budgeted for the programme. Likewise, a 20% increase in the cost of the  
29  
30 286 consumables that are required for taking stool samples would mean that the programme would  
31  
32 287 cost RM15 million (~I\$10 million) more than the originally calculated total cost.  
33  
34  
35  
36  
37  
38  
39  
40

## 41 289 **DISCUSSION**

42  
43  
44 290 The result of this analysis provides information to guide public health service planners and  
45  
46 291 commissioners in their decisions about an alternative CRC screening strategy i.e., a population-  
47  
48 292 based CRC screening programme using home-based iFOBT compared to current opportunistic  
49  
50 293 screening. It concluded that the net budget impact in the 1<sup>st</sup> year of implementing a CRC  
51  
52 294 screening programme of this kind would be RM107,631,959 (~I\$74,692,546). The impact  
53  
54 295 would increase by year due to increase in uptake and would reach RM148,485,812  
55  
56 296 (~I\$103,043,589) in the 5<sup>th</sup> year of implementation. This analytical approach and the results of  
57  
58 297 this analysis are presented as aids to better decision making by MoHs and stakeholders in  
59  
60

1  
2  
3 298 lower-middle-income countries (LMICs) about health programme planning and in this  
4  
5 299 particular illustrative case to the MoHM regarding the degree to which the proposed CRC  
6  
7 300 screening programme is affordable.  
8  
9

10 301  
11  
12 302 The total budget that was allocated to the MoHM in 2022 was RM32.4 billion (~I\$22.5  
13  
14 303 million).<sup>18</sup> Spending on prevention and public health services in 2009 was reported to be  
15  
16 304 RM1.6 billion (~I\$1.1 million).<sup>15</sup> More recent data and information about the size of the budget  
17  
18 305 that is allocated to cancer screening is not available. As such, it is estimated that the net budget  
19  
20 306 impact of implementing a CRC screening programme would account for between 7-10% of the  
21  
22 307 total budget for prevention and public health services. This sum is a considerable amount of  
23  
24 308 money relative to the budget allocation for prevention programmes/interventions, a budget that  
25  
26 309 has to be spread across several health conditions or domains.  
27  
28  
29  
30

31 310  
32  
33 311 The key factor in the implementation of a population-based screening programme/service or the  
34  
35 312 factor that has biggest impact on the budget is the size of the population who use the service. The  
36  
37 313 degree of accuracy regarding population size estimates is related closely to the cost estimates in  
38  
39 314 the budget. It is important for service planners to keep this point in mind and to take into account  
40  
41 315 an increase in uptake and the impact of such an increase. Therefore, in the case of the CRC  
42  
43 316 programme presented here, we assumed a 5% increase annually in uptake and calculated the net  
44  
45 317 budget impact. The net budget impact can be recalculated according to the actual change in uptake  
46  
47 318 after the programme is implemented.  
48  
49  
50

51 319  
52  
53 320 Budget impact analysis is an economic assessment that is used to estimate the changes in  
54  
55 321 expenditure of a specific budget holder if a new health technology/programme is implemented.<sup>9</sup>  
56  
57 322 As such, BIA complements other health economic evaluation methods such as cost-  
58  
59  
60

1  
2  
3 323 effectiveness analysis (CEA) to provide a comprehensive economic assessment of a health care  
4  
5 324 intervention to decision makers.<sup>9</sup> A BIA aids decision making by health service planners and  
6  
7 325 commissioners about whether an intervention or programme is affordable within given budget  
8  
9 326 constraints while a CEA informs decisions about whether an intervention is good value for  
10  
11 327 money.<sup>9 19</sup> BIA and its pragmatic approach is an ideal method when a situation calls for an  
12  
13 328 evaluation of ‘affordability’ which is of central importance in LMICs and, arguably, is the key  
14  
15 329 concern of whoever is in charge of managing a health care budget.<sup>20 21</sup>

16  
17  
18  
19 330

20  
21 331 It could well be that savings in earlier treatment would counterbalance the additional budget  
22  
23 332 impact. However, a BIA is not intended to provide answers to questions about whether or not,  
24  
25 333 in this context, the screening programme is good value for money as it does not take into  
26  
27 334 account the potential improvements in outcomes (e.g., increase quality-related life years) and  
28  
29 335 savings from lower treatment costs for CRC diagnosed at earlier stages. The conduct of other  
30  
31 336 types of economic evaluations such as a cost-effectiveness analysis would be required to  
32  
33 337 provide a complete and comprehensive set of evidence for decision makers.  
34  
35  
36

37 338

38  
39  
40 339 Finally, the conduct of BIA in this paper has some limitations. First, assumptions and cost  
41  
42 340 inputs for the CRC screening programme were based on the costs and rates that were observed  
43  
44 341 in the CRC-SIM research project. The project was conducted in only one district (Segamat);  
45  
46 342 and the distribution of three main ethnic groups (i.e., Malay, Chinese, Indian) in the project  
47  
48 343 differed from the proportions that have been reported nation-wide (72%:24%:3% vs  
49  
50 344 62%:21%:6%, respectively). Therefore, it is important to be mindful of the possibility that the  
51  
52 345 assumptions and inputs (based on the project) may not be representative for, or read across to,  
53  
54 346 the whole population of Malaysia. Likewise, it is important to bear in mind that our findings  
55  
56 347 do not include the perspective of other payers and may not generalise to other settings. The  
57  
58  
59  
60

348 results are related directly to the context of the Malaysian health system and the epidemiology  
 349 of CRC in the country though they are illustrative of the positive contribution of the BIA  
 350 methodology and approach.

## 351 **CONCLUSIONS**

352 This study employed a BIA methodology to analyse the costs of a novel CRC screening  
 353 programme using home-based iFOBT and mHealth versus the current opportunistic screening.  
 354 The findings estimated the net budget impact of implementing a population-based national  
 355 CRC screening programme in Malaysia. The modelling estimations are important  
 356 considerations for health authorities when they are required to decide the affordability of  
 357 implementing a programme and to aid budgetary planning as well as decision making,  
 358 generally, about implementation. Our study illustrates the use and value of the BIA approach  
 359 in LMICs and resource-constrained settings.

## 360 **Abbreviations**

|         |                                                                     |
|---------|---------------------------------------------------------------------|
| BIA     | Budget impact analysis                                              |
| CEA     | Cost-effectiveness analysis                                         |
| CRC     | Colorectal cancer                                                   |
| CRC-SIM | Colorectal Cancer Screening Intervention for Malaysia               |
| iFOBT   | Immunochemical faecal occult blood test                             |
| I\$     | International Dollar                                                |
| ISPOR   | The Professional Society for Health Economics and Outcomes Research |
| MoHM    | Ministry of Health of Malaysia                                      |
| NICE    | National Institute for Health and Care Excellence                   |
| RM      | Malaysian ringgit                                                   |



SEACO Southeast Asia Community Observatory

UK The United Kingdom

## 361 **DECLARATIONS**

362 **Research ethics approval.** Not applicable (This study does not involve human participants).

363 **Funding.** This research was supported by the Medical Research Council (UK) Global  
364 Challenges Research Fund (MR/S014349/1) and the National Medical Research Register  
365 Malaysia (NMRR ID-21-02045-O7G). The funder of the study had no role in study design,  
366 data collection, data analysis, data interpretation, or writing of the report.

367 **Competing interests.** The authors have no conflicts of interest to declare that are relevant to  
368 the content of this article.

369 **Availability of data and material.** All data generated or analysed during this study are  
370 included in this published article.

371 **Authors' contributions.** TTN: Methodology, Formal Analysis, Writing – Original draft, Writing –  
372 Review & Editing. KG, MRS, and DS: Data Curation, Investigation, Writing – Review & Editing. ST:  
373 Resources, Writing – Review & Editing. TTS, and MD: Conceptualization, Funding acquisition,  
374 Writing – Review & Editing, Supervision. CON: Methodology, Formal Analysis, Writing – Review &  
375 Editing, Supervision.

## 376 **REFERENCE**

- 377 1. Ferlay J, Ervik M, Lam F, et al. Global Cancer Observatory: Cancer Today. Lyon, France:  
378 International Agency for Research on Cancer, 2020.
- 379 2. Ministry of Health Malaysia. Malaysian National Cancer Registry Report 2012-2016:  
380 Ministry of Health Malaysia, 2020.
- 381 3. Magaji BA, Moy FM, Roslani AC, et al. Survival rates and predictors of survival among  
382 colorectal cancer patients in a Malaysian tertiary hospital. *BMC Cancer*  
383 2017;17(1):339. doi: 10.1186/s12885-017-3336-z
- 384 4. Rawla P, Sunkara T, Barsouk A. Epidemiology of colorectal cancer: incidence, mortality,  
385 survival, and risk factors. *Prz Gastroenterol* 2019;14(2):89-103. doi:  
386 10.5114/pg.2018.81072 [published Online First: 2019/01/06]



- 1  
2  
3 387 5. Tamin NSI, Razalli KA, Sallahuddin SN, et al. A 5-year evaluation of using stool-based test  
4 388 for opportunistic colorectal cancer screening in primary health institutions across  
5 389 Malaysia. *Cancer epidemiology* 2020;69:101829. doi: 10.1016/j.canep.2020.101829  
6 390 [published Online First: 2020/10/01]
- 8 391 6. Ministry of Health Malaysia. Clinical Practice Guidelines – Management of Colorectal  
9 392 Carcinoma. Putrajaya: Malaysia Health Technology Assessment Section (MaHTAS),  
10 393 2017:80.
- 12 394 7. Issa IA, Nouredine M. Colorectal cancer screening: An updated review of the available  
13 395 options. *World journal of gastroenterology* 2017;23(28):5086-96. doi:  
14 396 10.3748/wjg.v23.i28.5086 [published Online First: 2017/08/16]
- 16 397 8. Mauskopf JA, Sullivan SD, Annemans L, et al. Principles of good practice for budget impact  
17 398 analysis: report of the ISPOR Task Force on good research practices--budget impact  
18 399 analysis. *Value Health* 2007;10(5):336-47. doi: 10.1111/j.1524-4733.2007.00187.x  
19 400 [published Online First: 2007/09/25]
- 21 401 9. Sullivan SD, Mauskopf JA, Augustovski F, et al. Budget impact analysis-principles of good  
22 402 practice: report of the ISPOR 2012 Budget Impact Analysis Good Practice II Task  
23 403 Force. *Value Health* 2014;17(1):5-14. doi: 10.1016/j.jval.2013.08.2291 [published  
24 404 Online First: 2014/01/21]
- 26 405 10. Ngan TT, Donnelly M, O'Neill C. Budget impact analysis of a population-based screening  
27 406 programme for colorectal cancer in Malaysia: technical report of a modelling study.  
28 407 July 1 ed. Belfast: Centre for Public Health, Queen's University Belfast, 2022:32.
- 29 408 11. World Population Review. Malaysia Population Pyramid 2022: World Population Review.
- 31 409 12. Department Statistics of Malaysia. Demographic Statistics Factsheet. Malaysia:  
32 410 Department Statistics of Malaysia, 2021.
- 33 411 13. Public Services Commission of Malaysia. Medical Officer Grade UD41: Public Services  
34 412 Commission of Malaysia.
- 36 413 14. Public Services Commission of Malaysia. Medical laboratory technologist Grade U29:  
37 414 Public Services Commission of Malaysia.
- 39 415 15. Jaafar S, Noh KM, Muttalib KA, et al. Malaysia Health System Review. In: Healy J, ed.  
40 416 Health Systems in Transition: Asia Pacific Observatory on Health Systems and  
41 417 Policies, 2013.
- 42 418 16. Health Information and Quality Authority. Guidelines for the budget impact analysis of  
43 419 health technologies in Ireland, 2018:50.
- 45 420 17. M.Gray A, Clarke PM, Wolstenholme JL, et al. Applied Methods of Cost-effectiveness  
46 421 Analysis in Health Care. New York: Oxford University Press 2011.
- 48 422 18. Ministry of Finance Malaysia. Budget 2022: RM32.4 billion allocation for MOH. 2021.  
49 423 [https://www.mof.gov.my/portal/en/news/press-citations/budget-2022-rm32-4-billion-](https://www.mof.gov.my/portal/en/news/press-citations/budget-2022-rm32-4-billion-allocation-for-moh)  
50 424 [allocation-for-moh](https://www.mof.gov.my/portal/en/news/press-citations/budget-2022-rm32-4-billion-allocation-for-moh).
- 51 425 19. Leelahavarong P. Budget Impact Analysis. *J Med Assoc Thai* 2014;97(Suppl. 5):S65-S71.
- 53 426 20. Orlewska E, Gulácsi L. Budget-Impact Analyses: A Critical Review of Published Studies.  
54 427 *PharmacoEconomics* 2009;27(10):807-27. doi: 10.2165/11313770-000000000-00000
- 56 428 21. Garattini L, van de Vooren K. Budget impact analysis in economic evaluation: a proposal  
57 429 for a clearer definition. *The European Journal of Health Economics* 2011;12(6):499.  
58 430 doi: 10.1007/s10198-011-0348-5  
59 431

1  
2  
3 432 **Figure Legends and Tables**  
4

5 433 Table 1 Input assumptions used to estimate the population at each stage of the patient pathways  
6

7 434 Table 2 Resources and unit costs  
8

9 435 Table 3 Annual cost of proposed practice (i.e., CRC screening programme)  
10

11 436 Figure 1 Patient pathways in ‘usual care’ practice - opportunistic screening for CRC  
12

13 437 Figure 2 Patient pathway in population-based CRC screening programme  
14

15 438 Figure 3 Results of multiple univariate sensitive analyses showing key factors that exert most  
16  
17 influence the net budget impact  
18  
19  
20

21 440  
22

23 441 **Supplementary material**  
24

25 442 Figure S1 Visual depiction of the budget impact cost calculator  
26  
27

28 443 Table S1 Net budget impact of CRC screening programme over 5-year timeframe, by state  
29  
30  
31  
32  
33  
34  
35  
36  
37  
38  
39  
40  
41  
42  
43  
44  
45  
46  
47  
48  
49  
50  
51  
52  
53  
54  
55  
56  
57  
58  
59  
60

Figure 1: Patient pathway in 'usual care' practice - opportunistic screening for CRC

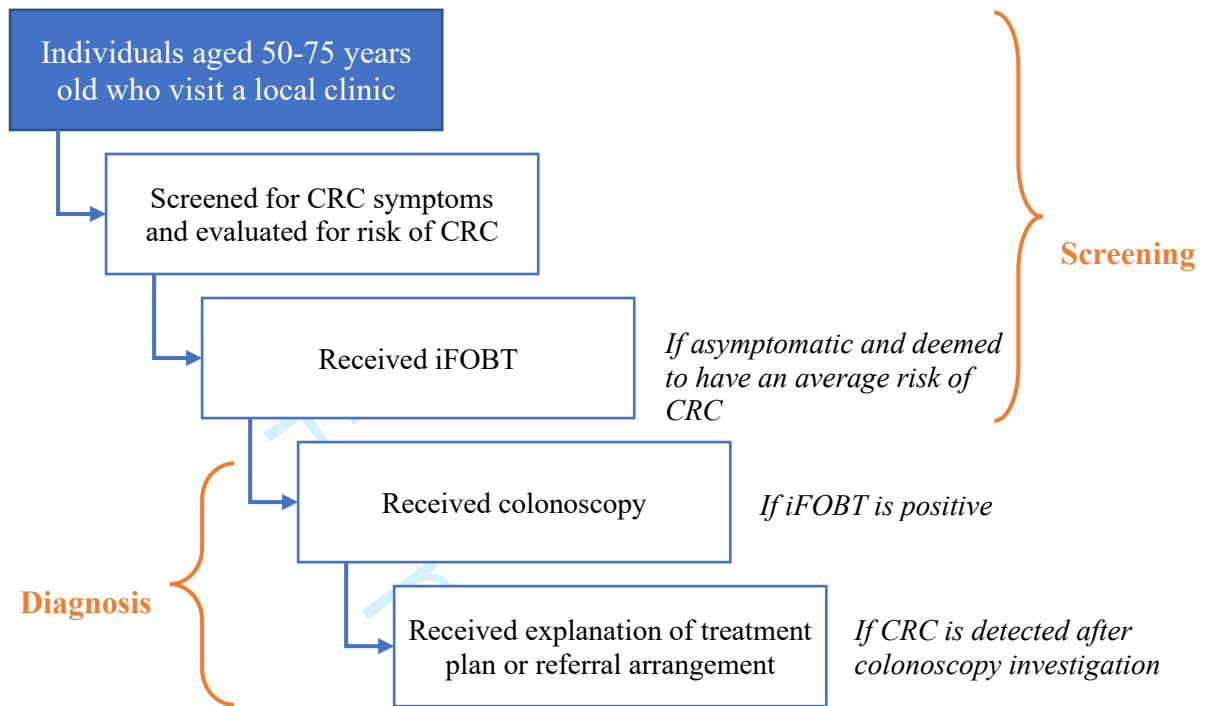

**Figure 2: Patient pathway in population-based CRC screening programme**

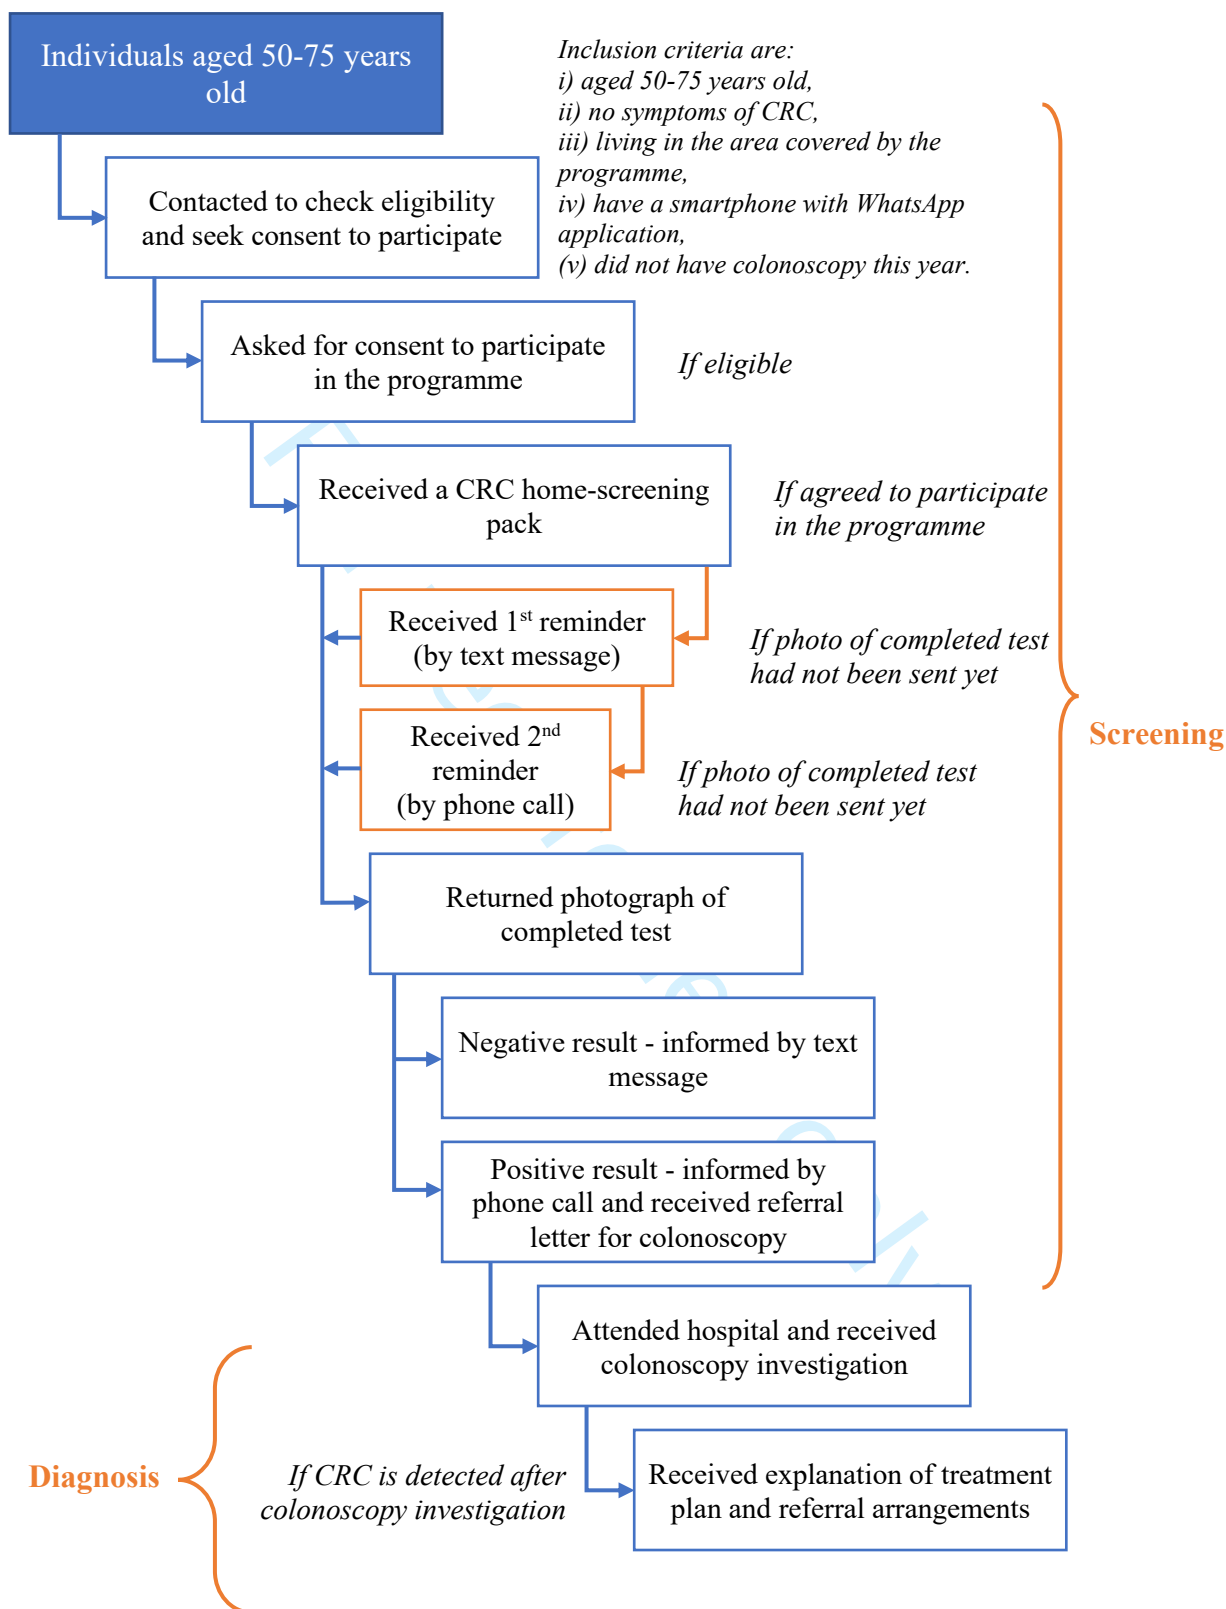

**Figure 3: Results of multiple univariate sensitive analyses showing key factors that exert most influence the net budget impact**

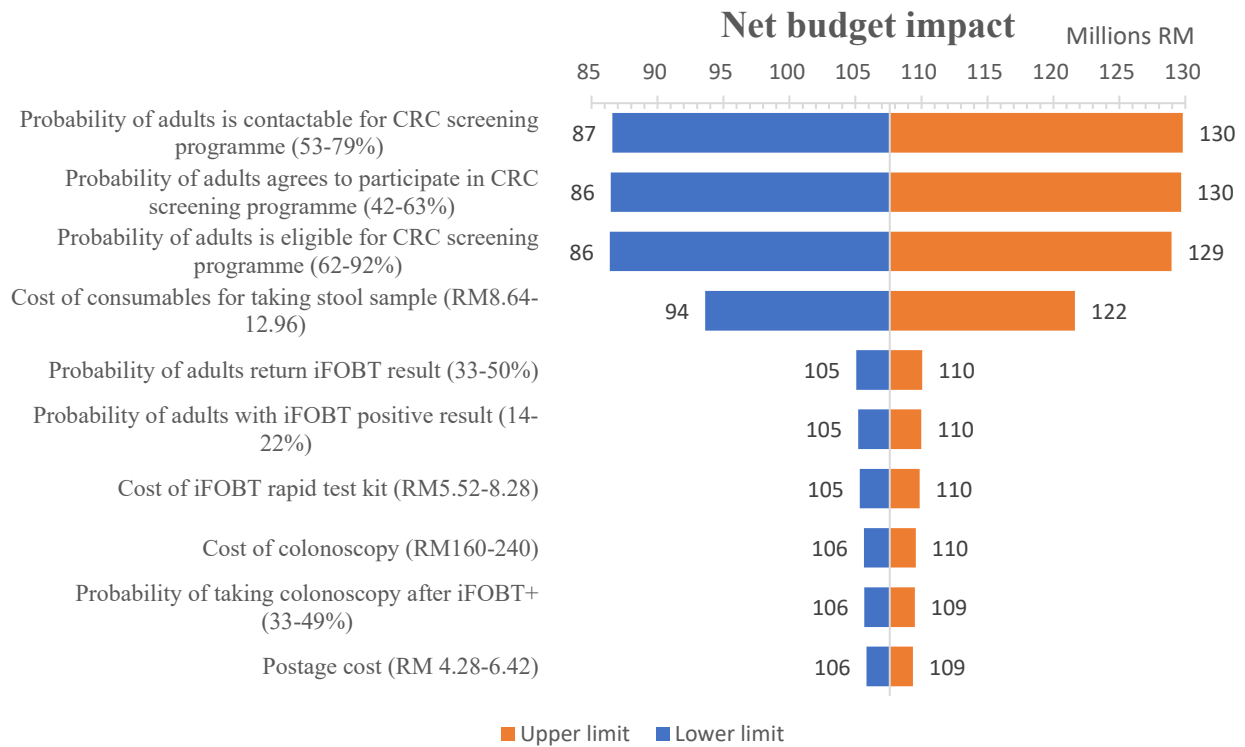

Supplementary material

Figure S1: Visual depiction of the budget impact cost calculator

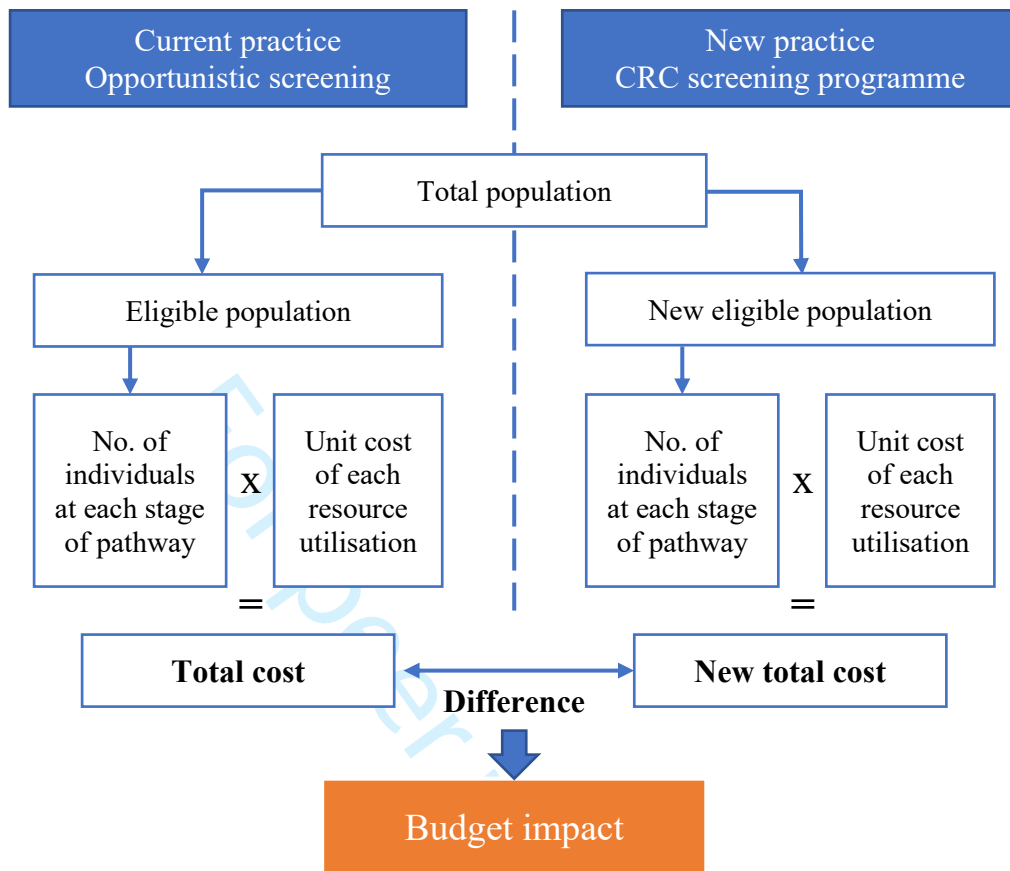

## Supplementary material

**Table S1: Net budget impact of CRC screening programme over 5-year timeframe, by state**

Currency: Malaysian ringgit

| State                    | Population        | Year 1             | Year 2             | Year 3             | Year 4             | Year 5             |
|--------------------------|-------------------|--------------------|--------------------|--------------------|--------------------|--------------------|
| <b>Johor</b>             | 3,822,800         | 12,597,041         | 13,791,897         | 14,986,752         | 16,181,607         | 17,376,462         |
| <b>Kedah</b>             | 2,206,200         | 7,272,541          | 7,962,112          | 8,651,682          | 9,341,252          | 10,030,823         |
| <b>Kelantan</b>          | 1,884,300         | 6,212,311          | 6,801,268          | 7,390,225          | 7,979,183          | 8,568,140          |
| <b>Melaka</b>            | 934,700           | 3,084,637          | 3,376,787          | 3,668,937          | 3,961,087          | 4,253,238          |
| <b>Negeri Sembilan</b>   | 1,141,000         | 3,764,122          | 4,120,753          | 4,477,384          | 4,834,016          | 5,190,647          |
| <b>Pahang</b>            | 1,702,900         | 5,614,833          | 6,147,092          | 6,679,351          | 7,211,609          | 7,743,868          |
| <b>Perak</b>             | 2,569,300         | 8,468,450          | 9,271,511          | 10,074,572         | 10,877,633         | 11,680,693         |
| <b>Pulau Pinang</b>      | 1,767,100         | 5,826,301          | 6,378,626          | 6,930,951          | 7,483,276          | 8,035,601          |
| <b>Sabah</b>             | 3,919,600         | 12,915,864         | 14,140,975         | 15,366,086         | 16,591,197         | 17,816,308         |
| <b>Sarawak</b>           | 2,829,400         | 9,325,144          | 10,209,501         | 11,093,859         | 11,978,217         | 12,862,575         |
| <b>Terengganu</b>        | 1,245,300         | 4,107,648          | 4,496,879          | 4,886,111          | 5,275,342          | 5,664,573          |
| <b>Perlis</b>            | 253,500           | 841,028            | 920,262            | 999,496            | 1,078,730          | 1,157,964          |
| <b>W.P. Kuala Lumpur</b> | 1,790,100         | 5,902,043          | 6,461,557          | 7,021,071          | 7,580,585          | 8,140,099          |
| <b>W.P. Labuan</b>       | 99,000            | 332,138            | 363,081            | 394,024            | 424,968            | 455,911            |
| <b>W.P. Putrajaya</b>    | 97,100            | 325,886            | 356,236            | 386,585            | 416,935            | 447,284            |
| <b>Nation-wide</b>       | <b>32,676,786</b> | <b>107,631,959</b> | <b>117,845,422</b> | <b>128,058,885</b> | <b>138,272,349</b> | <b>148,485,812</b> |

CRC: Colorectal cancer | W.P.: The Federal Territories (Malay: Wilayah Persekutuan)

Readers can convert from Malaysian Ringgit to their currency of interest (e.g., International Dollar, US Dollar, British Pound, Euro etc.) using the free web-based tool ‘CCEMG – EPPI-Centre Cost Converter’ (<https://eppi.ioe.ac.uk/costconversion/default.aspx>). This tool help adjusting estimates of cost expressed in one currency and price year to a specific target currency and price year.

ISPOR—The Professional Society for Health Economics and Outcomes Research

## Budget Impact Analysis—Principles of Good Practice: Report of the ISPOR 2012 Budget Impact Analysis Good Practice II Task Force

Citation: Sullivan SD, Mauskopf JA, Augustovski F, Jaime Caro J, Lee KM, Minchin M, Orlewska E, Penna P, Rodriguez Barrios JM, Shau WY. Budget impact analysis-principles of good practice: report of the ISPOR 2012 Budget Impact Analysis Good Practice II Task Force. Value Health. 2014 Jan-Feb;17(1):5-14. doi: <https://doi.org/10.1016/j.jval.2013.08.2291>

### Recommendations for Reporting Format

| Section/topic                                 | Guidance for reporting                                                                                                                                                                                                 | Reported in section                                                                          |
|-----------------------------------------------|------------------------------------------------------------------------------------------------------------------------------------------------------------------------------------------------------------------------|----------------------------------------------------------------------------------------------|
| <b>Introduction</b>                           |                                                                                                                                                                                                                        |                                                                                              |
| Objectives                                    | The objective of the BIA should be clearly stated and tied to the study perspectives                                                                                                                                   | Introduction                                                                                 |
| Epidemiology and management of health problem | Present information about the prevalence and incidence of the particular disease, disease severity, disease progression, undiagnosed or undertreated cases, and risk factors pertinent to estimating the budget impact | Introduction                                                                                 |
| Clinical impact                               | Consist of a brief description of the eligible population and existing management options and their efficacy and safety that are relevant to the design of the study of the BIA                                        | Introduction                                                                                 |
| Economic impact                               | Include a brief description of previous BIAs in the condition of interest for another intervention and condition-specific treatment patterns and cost-of-care studies                                                  | Not applicable (No previous BIA)                                                             |
| <b>Study Design and Methods</b>               |                                                                                                                                                                                                                        |                                                                                              |
| Patient population                            | Specify the eligible population for the new intervention                                                                                                                                                               | Methods<br>Sub-section: Eligible population and input assumptions<br>Table 1                 |
| Intervention mix                              | Contain a detailed description of the use and characteristics of each intervention in the current intervention mix and in the expected intervention mix after the introduction of the new intervention                 | Methods<br>Sub-section: Health service under assessment and its comparator<br>Figure 1 and 2 |
| Time horizon                                  | Should be presented and the choice(s) justified                                                                                                                                                                        | Methods<br>Sub-section: Perspective and time horizon                                         |
| Perspective                                   | Identify the BIAs' perspective(s), the cost categories included, and the intended audience                                                                                                                             | Methods<br>Perspective and time horizon                                                      |



## ISPOR—The Professional Society for Health Economics and Outcomes Research

| Section/topic                           | Guidance for reporting                                                                                                                                                                                                                                                                                                                                                                                          | Reported in section                                                                             |
|-----------------------------------------|-----------------------------------------------------------------------------------------------------------------------------------------------------------------------------------------------------------------------------------------------------------------------------------------------------------------------------------------------------------------------------------------------------------------|-------------------------------------------------------------------------------------------------|
| Analytic framework description          | Complete description of the structure of the BIA cost calculator or condition-specific cohort or individual simulation model                                                                                                                                                                                                                                                                                    | Methods<br>Sub-section: Eligible population and input assumptions                               |
| Input data                              | Input values used for the reported analyses, including alternative scenarios, should be presented                                                                                                                                                                                                                                                                                                               | Methods<br>Sub-section: Cost input and data sources<br>Table 2                                  |
| Data sources                            | The sources of data inputs should be described in detail                                                                                                                                                                                                                                                                                                                                                        | Methods<br>Sub-section: Cost input and data sources<br>Table 2                                  |
| Data collection                         | The methods and processes for any primary data collection and data abstraction tasks not reported elsewhere should be described and explained.                                                                                                                                                                                                                                                                  | Not applicable (secondary data)                                                                 |
| Analyses                                | A description of the calculations used to complete the BIA should be provided. The choice of all the scenarios presented in the results should be documented and justified.                                                                                                                                                                                                                                     | Methods<br>Sub-section: Computing framework and base-case analysis under budget impact analyses |
| Uncertainty                             | Uncertainty analysis methods should be described and justified                                                                                                                                                                                                                                                                                                                                                  | Methods<br>Sub-sections:<br>Uncertainty and scenario analyses under budget impact analyses      |
| <b>Results</b>                          | The budget impact should be presented for each budget period over the time horizon. Both budget period resource use and costs should be presented. The estimates of resource use should be listed in a table that shows the change in use for each time period reported in the BIA<br><br>The results of the uncertainty analyses and scenarios analyzed should be described and presented in figures or tables | Results<br>Table 3<br><br>Results<br>Figure 2                                                   |
| <b>Conclusions and Limitations</b>      | State the main conclusions on the basis of the results of the BIA.<br>Report the main limitations regarding key issues such as design aspects including off-label use and adherence assumptions and the completeness and quality of data inputs and sources.                                                                                                                                                    | Discussion<br><br>Conclusion                                                                    |
| <b>Inclusion of Graphics and Tables</b> |                                                                                                                                                                                                                                                                                                                                                                                                                 |                                                                                                 |
| Figure of the analytical framework      | Flow diagrams or other visual depictions of the cost calculator or condition-specific cohort or individual simulation model are recommended to be included with the analytical framework description.                                                                                                                                                                                                           | Supplementary material<br>Figure S1                                                             |

## ISPOR—The Professional Society for Health Economics and Outcomes Research

| Section/topic                                    | Guidance for reporting                                                                                                                                                                                                          | Reported in section |
|--------------------------------------------------|---------------------------------------------------------------------------------------------------------------------------------------------------------------------------------------------------------------------------------|---------------------|
| Table of assumptions                             | All the major assumptions should be listed in a tabular form                                                                                                                                                                    | Table 1             |
| Tables of inputs                                 | All the input parameter values and their data sources and derivations should be presented in a tabular form                                                                                                                     | Table 2             |
| Tables of outputs                                | All outputs should be presented in a tabular and/or graphical Form                                                                                                                                                              | Table 3             |
| Schematic representation of uncertainty analyses | Diagrams such as Tornado diagrams should be included along with the text on the results of the scenario analyses                                                                                                                | Figure 3            |
| Appendices and References                        | The appendices may cover literature search strategies, evidence summaries, intermediate results (e.g., of individual Delphi panel rounds), and the names and addresses of participating experts and investigators, for example. | Reference           |

# BMJ Open

## A budget impact analysis of a home-based colorectal cancer screening programme in Malaysia

|                                 |                                                                                                                                                                                                                                                                                                                                                                                                                                                                                                                                                                                                                                                                                                                                                                                                                                            |
|---------------------------------|--------------------------------------------------------------------------------------------------------------------------------------------------------------------------------------------------------------------------------------------------------------------------------------------------------------------------------------------------------------------------------------------------------------------------------------------------------------------------------------------------------------------------------------------------------------------------------------------------------------------------------------------------------------------------------------------------------------------------------------------------------------------------------------------------------------------------------------------|
| Journal:                        | <i>BMJ Open</i>                                                                                                                                                                                                                                                                                                                                                                                                                                                                                                                                                                                                                                                                                                                                                                                                                            |
| Manuscript ID                   | bmjopen-2022-066925.R1                                                                                                                                                                                                                                                                                                                                                                                                                                                                                                                                                                                                                                                                                                                                                                                                                     |
| Article Type:                   | Original research                                                                                                                                                                                                                                                                                                                                                                                                                                                                                                                                                                                                                                                                                                                                                                                                                          |
| Date Submitted by the Author:   | 21-Dec-2022                                                                                                                                                                                                                                                                                                                                                                                                                                                                                                                                                                                                                                                                                                                                                                                                                                |
| Complete List of Authors:       | Ngan, Tran; Queen's University Belfast, Centre for Public Health<br>Ramanathan, Kogila; Monash University Malaysia, Global Public Health, Jeffrey Cheah School of Medicine and Health Sciences; Monash University Malaysia, South East Asia Community Observatory<br>Saleh, Muhamad; Monash University Malaysia, South East Asia Community Observatory<br>Schliemann, Desiree ; Queen's University Belfast, Centre for Public Health<br>Ibrahim Tamin, Nor Saleha ; Ministry of Health Malaysia<br>Su, Tin ; Monash University Malaysia, Global Public Health, Jeffrey Cheah School of Medicine and Health Sciences; Monash University Malaysia, South East Asia Community Observatory<br>Donnelly, Michael; Queen's University Belfast, Centre for Public Health<br>O'Neill, Ciaran; Queen's University Belfast, Centre for Public Health |
| <b>Primary Subject Heading</b>: | Health economics                                                                                                                                                                                                                                                                                                                                                                                                                                                                                                                                                                                                                                                                                                                                                                                                                           |
| Secondary Subject Heading:      | Global health, Public health, Oncology                                                                                                                                                                                                                                                                                                                                                                                                                                                                                                                                                                                                                                                                                                                                                                                                     |
| Keywords:                       | Health policy < HEALTH SERVICES ADMINISTRATION & MANAGEMENT, ONCOLOGY, HEALTH ECONOMICS, PUBLIC HEALTH                                                                                                                                                                                                                                                                                                                                                                                                                                                                                                                                                                                                                                                                                                                                     |
|                                 |                                                                                                                                                                                                                                                                                                                                                                                                                                                                                                                                                                                                                                                                                                                                                                                                                                            |

SCHOLARONE™  
Manuscripts



I, the Submitting Author has the right to grant and does grant on behalf of all authors of the Work (as defined in the below author licence), an exclusive licence and/or a non-exclusive licence for contributions from authors who are: i) UK Crown employees; ii) where BMJ has agreed a CC-BY licence shall apply, and/or iii) in accordance with the terms applicable for US Federal Government officers or employees acting as part of their official duties; on a worldwide, perpetual, irrevocable, royalty-free basis to BMJ Publishing Group Ltd ("BMJ") its licensees and where the relevant Journal is co-owned by BMJ to the co-owners of the Journal, to publish the Work in this journal and any other BMJ products and to exploit all rights, as set out in our [licence](#).

The Submitting Author accepts and understands that any supply made under these terms is made by BMJ to the Submitting Author unless you are acting as an employee on behalf of your employer or a postgraduate student of an affiliated institution which is paying any applicable article publishing charge ("APC") for Open Access articles. Where the Submitting Author wishes to make the Work available on an Open Access basis (and intends to pay the relevant APC), the terms of reuse of such Open Access shall be governed by a Creative Commons licence – details of these licences and which [Creative Commons](#) licence will apply to this Work are set out in our licence referred to above.

Other than as permitted in any relevant BMJ Author's Self Archiving Policies, I confirm this Work has not been accepted for publication elsewhere, is not being considered for publication elsewhere and does not duplicate material already published. I confirm all authors consent to publication of this Work and authorise the granting of this licence.

1  
2  
3 **A budget impact analysis of a home-based colorectal cancer screening**  
4 **programme in Malaysia**  
5  
6  
7

8  
9 Tran Thu Ngan<sup>1\*</sup>, Kogila Ramanathan<sup>2,3</sup>, Muhamad Raziq Bin Mohd Saleh<sup>3</sup>, Désirée  
10 Schliemann<sup>1</sup>, Nor Saleha Binti Ibrahim Tamin<sup>4</sup>, Tin Tin Su<sup>2,3</sup>, Michael Donnelly<sup>1</sup>, Ciaran  
11 O'Neill<sup>1</sup>  
12  
13

14  
15  
16 <sup>1</sup> *Centre for Public Health, Queen's University Belfast, Belfast, UK*

17  
18 <sup>2</sup> *Global Public Health, Jeffrey Cheah School of Medicine and Health Sciences, Monash*  
19 *University Malaysia, Selangor, Malaysia*  
20

21  
22 <sup>3</sup> *South East Asia Community Observatory (SEACO), Jeffrey Cheah School of Medicine and*  
23 *Health Sciences, Monash University Malaysia*  
24

25  
26 <sup>4</sup> *Ministry of Health Malaysia, Putrajaya, Malaysia*  
27  
28

29  
30  
31  
32 \* Correspondence to:

33  
34 Tran Thu Ngan, PhD

35  
36 Postal address: Centre for Public Health, Queen's University Belfast, Belfast, United Kingdom

37  
38 Email: [n.t.tran@qub.ac.uk](mailto:n.t.tran@qub.ac.uk)  
39  
40  
41  
42

43  
44 ORCID of the authors

45  
46 Tran Thu Ngan : 0000-0003-2771-9878

47  
48 Désirée Schliemann : 0000-0002-8746-3002

49  
50 Ciaran O'Neill : 0000-0001-7668-3934  
51  
52  
53  
54  
55  
56  
57  
58  
59  
60

# 1 A budget impact analysis of a home-based colorectal cancer screening 2 programme in Malaysia

## 3 Abstract

4 **Objectives:** The 2020-2022 research project ‘Colorectal Cancer Screening Intervention for  
5 Malaysia’ (CRC-SIM) evaluated the implementation of a home-based CRC screening pilot in  
6 Segamat District. This budget impact analysis (BIA) assessed the expected changes in health  
7 expenditure of the Malaysian Ministry of Health budget in the scenario where the pilot  
8 programme was implemented nationwide versus current opportunistic screening.

9 **Design:** Budget impact analysis. Assumptions and costs in the opportunistic and novel CRC  
10 screening scenarios were derived from a previous evaluation of opportunistic CRC screening in  
11 community health clinics across Malaysia and the CRC-SIM research project, respectively.

12 **Setting:** National level (with supplement analysis for district level). The BIA was conducted  
13 from the viewpoint of the federal government and estimated the annual financial impact over  
14 a period of five years.

15 **Results:** The total annual cost of the current practice of opportunistic screening was  
16 RM1,584,321 (~I\$1,099,460; RM=Ringgit Malaysia; I\$=International dollar) of which 80%  
17 (RM1,274,690 or ~I\$884,587) was expended on the provision of opportunistic CRC to adults  
18 who availed of the service. Regarding the implementation of national CRC screening  
19 programme, the net budget impact in the 1<sup>st</sup> year was estimated to be RM107,631,959  
20 (~I\$74,692,546) and to reach RM148,485,812 (~I\$103,043,589) in the 5<sup>th</sup> year based on an  
21 assumed increased uptake of 5% annually. The costs were calculated to be sensitive to the  
22 probability of adults who were contactable, eligible, and agreeable to participating in the  
23 programme.

24 **Conclusions:** Results from the BIA aids decision making by health services planners and  
25 commissioners in Malaysia about whether a population-based national CRC screening  
26 programme is affordable within given budget constraint. The study also illustrates the use and  
27 value of the BIA approach in LMICs and resource-constrained settings.

28  
29 **Keywords:** Colorectal cancer screening, budget impact analysis, home-based testing, global  
30 health, Malaysia

### Strengths and limitations of this study

- The budget impact analysis (BIA) was used to evaluate the ‘affordability’ of colorectal cancer (CRC) screening programme in Malaysia within given budget constraint.
- Assumptions and cost inputs for modelling the budget impact were based on the actual costs and rates observed in Malaysia.
- The total cost of resources (=unit costs \* number of users) for opportunistic screening and the CRC screening programme were compared to calculate the net budget impact.
- The BIA was conducted from the viewpoint of the federal government and only included costs and resource requirements relevant to this particular budget holder.
- The BIA could not and was not intended to provide answers to questions about whether or not the screening programme is good value for money (which can be answered by a cost-effectiveness analysis).

## INTRODUCTION

Colorectal cancer (CRC) has the second highest incidence and mortality rate among all types of cancer in both sexes in Malaysia [1]. The age standardised incidence rate in 2012-2016 was 14.8 per 100,000 males and 11.1 per 100,000 females which appears to be stable compared to 2007-2011 [2]. In contrast, the proportion of CRC patients who are diagnosed at a late stage (i.e., stage III or IV) is increasing. Report from Ministry of Health Malaysia (MoHM) showed that the proportion of males with late stage CRC increased from 65.9% during 2007-2011 to 72.4% during 2012-2016; and from 65.2% to 73.1% for females [2]. The report did not give an explanation about this increasing trend though [2]. Late stage diagnosis negatively impacts survival rate; for example, the 5-year survival rates for cases diagnosed at stage I, II, III, and IV in 2002-2004 in Kuala Lumpur were 78.6%, 52.9%, 44.3%, and 9.3%, respectively [3]. Improved survival can be achieved by early detection through screening and the removal of premalignant polyps [4]. However, Malaysia currently does not have a population-based national CRC screening programme.

1  
2  
3 47 The Ministry of Health of Malaysia (MoHM) adopted the use of immunochemical faecal occult  
4  
5 48 blood test (iFOBT) for opportunistic CRC screening at public health clinics since 2014 [5].  
6  
7 49 MoHM guidelines recommend screening for asymptomatic individuals aged 50-75 years old  
8  
9 50 with average risk of CRC [6]. The uptake (number of patients screened/total eligible  
10  
11 51 population) of this opportunistic screening tends to be very low. The annual average uptake  
12  
13 52 during 2014-2018 was 0.5% while the 5-year cumulative uptake was 2.29% due to low  
14  
15 53 awareness about CRC in general and CRC tests in particular, fear of the result, concern about  
16  
17 54 the cost, and absence of a doctor's recommendation [5, 7]. Home-based iFOBT has been  
18  
19 55 implemented in many high-income countries (HICs) to improve the accessibility and uptake of  
20  
21 56 CRC screening [8]. In this context, the Southeast Asia Community Observatory (SEACO) at  
22  
23 57 Monash University Malaysia and Queen's University Belfast (Northern Ireland) collaborated  
24  
25 58 to conduct the research project, 'Colorectal Cancer Screening Intervention for Malaysia'  
26  
27 59 (CRC-SIM) in 2020-2022. This project evaluated the implementation of a home-based CRC  
28  
29 60 screening pilot in Segamat District. The uptake of the novel screening programme was 22%.  
30  
31 61 The significantly higher uptake indicates the potential population wide impact if this screening  
32  
33 62 approach (i.e., using home-based iFOBT and self-reporting test results) was scaled up.  
34  
35 63 However, in order to aid public health decision making, there is a need to model a scaled-up  
36  
37 64 version of the research-tested screening programme and, more specifically, gather insights  
38  
39 65 about the total costs of programme implementation and how it might impact the MoHM budget.  
40  
41 66 Therefore, this budget impact analysis (BIA) assessed the expected changes in the health  
42  
43 67 expenditure of MoHM budget as a result of implementing a population-based national CRC  
44  
45 68 screening programme versus current opportunistic screening (or 'usual care'). It assessed the  
46  
47 69 affordability of the screening programme given potential budget constraints.  
48  
49  
50  
51  
52  
53  
54  
55  
56  
57  
58  
59  
60



## 70 **METHODS**

71 The conduct of this BIA and presentation of this paper followed the guidelines developed by  
72 the International Society for Pharmacoeconomics and Outcomes Research (ISPOR) Task Force  
73 [9, 10]. All costs are presented in local currency -the Malaysian Ringgit (RM)- and  
74 International Dollar (I\$). RM was converted to I\$ using purchasing power parity (PPP)  
75 conversion factors instead of market exchange rates. The PPP conversion rate of 1.441 was  
76 obtained from the IMF World Economic Outlook Database [11].

### 78 **Health service under assessment and its comparator**

79 The specific health service that was the focus of the BIA was a population-based screening  
80 programme for colorectal cancer using a self-rapid response iFOBT. The comparator was  
81 current or 'usual care' - opportunistic screening.

82  
83 The BIA is predicated on the opportunistic screening programme being replaced by the new  
84 population-based screening programme (i.e., the two programmes would not be run in  
85 conjunction or in other words, the two scenarios in assessment are mutually exclusive). In each  
86 scenario, the patient pathway from the point when patients were invited for screening to receipt  
87 of a definitive diagnosis were identified and described. The screening procedure ends at the  
88 point of a patient receiving their iFOBT result with encouragement to attend hospital for a  
89 colonoscopy (if iFOBT is positive). It is important to note that the BIA included costs of  
90 screening and diagnosis (e.g., colonoscopy, biopsy) but not treatment. The BIA also did not  
91 address issues with respect to equity of access and uptake of services in either screening  
92 scenarios.

93

1  
2  
3 94 The patient pathways for the 'usual care' practice and the novel CRC screening programme are  
4  
5 95 presented in Figure 1 and 2, respectively. In opportunistic screening practice, it is recommended  
6  
7  
8 96 or expected that individuals who are aged 50-75 years will be screened for CRC symptoms  
9  
10 97 when they attend their local health clinic (for any health condition or problem). If they are  
11  
12 98 asymptomatic and have an average risk of having CRC (based on family history), they are  
13  
14 99 offered an iFOBT, followed by a colonoscopy if the iFOBT test was positive. If CRC is  
15  
16  
17 100 detected following a colonoscopy, the result is conveyed to a patient along with an explanation  
18  
19 101 of the treatment plan or referral arrangement.

20  
21  
22 102 (Figure 1 is about here)

23  
24 103 Details of the home-based screening intervention in CRC-SIM were published elsewhere [12].  
25  
26 104 Briefly, in the novel CRC screening programme, individuals aged 50-75 years were contacted,  
27  
28 105 checked for eligibility, and invited to participate. A home-screening 'pack' was posted to  
29  
30 106 eligible participants followed by two reminders. The test was performed at home by  
31  
32  
33 107 participants who took a photograph of the completed test and texted it to trained medical  
34  
35 108 professionals who interpreted the photograph. Participants with positive iFOBT were referred  
36  
37 109 for a colonoscopy at hospital.

38  
39  
40 110 (Figure 2 is about here)

41  
42 111 There were two main differences between these patient pathways. Firstly, individuals within  
43  
44 112 the target age group for screening were contacted directly and invited to participate in the novel  
45  
46 113 CRC screening programme while in the situation of 'usual care', CRC screening was offered  
47  
48 114 (if screening guideline recommendations were followed) only when members of the target  
49  
50 115 group visited their clinic for some other health condition or problem. Secondly, the iFOBT was  
51  
52 116 performed by doctors at health clinics in the 'usual care' pathway while in the novel CRC  
53  
54 117 screening programme, participants self-tested in their home. Home-based testing generated  
55  
56 118 additional stages in the pathways in relation to sending a test, reminding participants, taking a  
57  
58  
59  
60

1  
2  
3 119 photo of a completed test, and sending it to programme officers and vice versa. The remaining  
4  
5 120 stages of each pathway (e.g., being screened for eligibility, receiving a colonoscopy, and  
6  
7  
8 121 receiving a treatment plan) were the same across the two scenarios.  
9

10 122

### 12 123 **Eligible population and input assumptions**

14 124 The target population for current opportunistic screening in Malaysia is individuals aged 50-  
15  
16  
17 125 75 years, regardless of sex. Due to the nature of home-based screening, the target population  
18  
19 126 for the CRC screening programme was required to meet some additional inclusion criteria as  
20  
21  
22 127 presented in Figure 2. The number of individuals who presented and completed each stage was  
23  
24 128 estimated using input assumptions.  
25

26 129

28 130 Data about the population of Malaysia by age was taken from government reports (i.e.,  
29  
30  
31 131 Department of Statistics, Malaysia) and from World Population Review [13, 14]. The total  
32  
33 132 population was reported to be 32,676,786 in 2021, of which, 19% or 6,228,195 were aged 50-  
34  
35 133 75 years old [13, 14].  
36

37 134

40 135 **In the ‘usual care’ – opportunistic screening pathway or scenario**, all assumptions were  
41  
42 136 derived from a study by Tamin NSI (2020) which was a 5-year evaluation of opportunistic CRC  
43  
44 137 screening (and the use of stool-based tests) in community health clinics across Malaysia [5]. It  
45  
46  
47 138 was assumed that 0.482% of the eligible population would avail of CRC screening when they  
48  
49 139 attended local health clinics for other conditions; and 9.21% of this proportion of tested patients  
50  
51 140 would receive a positive result. Only 55.9% of patients in the study by Tamin availed of a  
52  
53 141 colonoscopy after a positive iFOBT. CRC detection after colonoscopy investigation was 4.04%.  
54

55  
56 142  
57  
58  
59  
60

1  
2  
3 143 **In the novel CRC screening programme**, all assumptions were derived from the CRC-SIM  
4  
5 144 research project. It was assumed that 50.51% of the eligible population would be contactable  
6  
7  
8 145 and meet all inclusion criteria to participate in the home-based screening programme; 52.27%  
9  
10 146 of people who were eligible would agree to participate; 41.63% would perform the iFOBT and  
11  
12 147 send a photo of a completed test to the programme officers; 18.01% of people who would be  
13  
14  
15 148 tested would receive a positive result; 41.07% would avail of colonoscopy after a positive  
16  
17 149 iFOBT result; and CRC detection after colonoscopy investigation would be 4.35%.

150

151 Table 1 summarises details about the input assumptions that were used to estimate the number  
152 of individuals at each stage of the respective pathway: the opportunistic screening pathway and  
153 the CRC screening programme pathway.

154

155 **Table 1: Input assumptions used to estimate the population at each stage of the patient**  
156 **pathways**

| Stage in pathway                                                                                           | Opportunistic screening scenario<br>(Current practice) |                    | Population-based CRC programme screening scenario<br>(Proposed practice) |                    |
|------------------------------------------------------------------------------------------------------------|--------------------------------------------------------|--------------------|--------------------------------------------------------------------------|--------------------|
|                                                                                                            | Assumption*                                            | No. of individuals | Assumption**                                                             | No. of individuals |
| Total population (all ages)                                                                                | NA                                                     | 32,676,786         | NA                                                                       | 32,676,786         |
| Target population (aged 50-75)                                                                             | 19.06%                                                 | 6,228,195          | 19.06%                                                                   | 6,228,195          |
| Eligible population (met all inclusion criteria)                                                           | 100%                                                   | 6,228,195          | 50.51%                                                                   | 3,146,020          |
| Availed of/agreed to take CRC screening                                                                    | 0.482%                                                 | 30,020             | 52.27%                                                                   | 1,644,561          |
| Needed 1 <sup>st</sup> reminder to return the iFOBT result (among those agreed to participate)             | NA                                                     | NA                 | 78.71%                                                                   | 1,294,514          |
| Needed 2 <sup>nd</sup> reminder to return the iFOBT result (among those received 1 <sup>st</sup> reminder) | NA                                                     | NA                 | 88.10%                                                                   | 1,140,405          |

|                                                           |       |        |        |         |
|-----------------------------------------------------------|-------|--------|--------|---------|
| Returned iFOBT result (among those agreed to participate) | 100%  | 30,020 | 41.63% | 684,683 |
| Received iFOBT positive result                            | 9.21% | 2,765  | 18.01% | 123,287 |
| Availed of colonoscopy after positive iFOBT               | 55.9% | 1,546  | 41.07% | 50,636  |
| CRC detection after colonoscopy investigation             | 4.04% | 62     | 4.35%  | 2,202   |

*CRC: Colorectal cancer; iFOBT: Immunochemical faecal occult blood test; NA: Not applicable; No: Number*  
*\* The assumptions were derived from a study of Tamin NSI (2020) which was a 5-year evaluation of using stool-based test for opportunistic CRC screening in primary health institutions across Malaysia [5].*

*\*\* The assumptions were derived from the Colorectal Cancer Screening Intervention for Malaysia (or CRC-SIM research project) in Segamat District, conducted by Queen's University Belfast, Monash University, and Southeast Asia Community Observatory (SEACO) in 2021.*

157

## 158 **Cost input and data sources**

159 In the opportunistic screening scenario, the total cost comprised the cost of:

160 (i) performing screening (e.g., asking for symptoms, family history, and collecting the sample)

161 (ii) processing stool specimens

162 (iii) interpreting test results and

163 (iv) conveying a definitive diagnosis to patients (include explaining treatment plan or referral  
 164 arrangements)

165

166 In the CRC programme screening scenario, the total cost comprised the costs of:

167 (i) contacting potential participants

168 (ii) delivering iFOBT test kits (including cost of the test, postage, print materials, and sending  
 169 video instruction)

170 (iii) sending a reminder to participants (up to 2 times, by text message and phone call)

171 (iv) interpreting and conveying results to participants and

172 (v) following-up patients with positive iFOBT but did not take colonoscopy in order to  
 173 encourage them to avail of the colonoscopy

174

175 These costs were calculated by multiplying the time allocated for the completion of each task  
 176 with the salary cost of the person who undertakes each task plus cost of consumables. Table 2  
 177 shows the unit cost for each cost element, related assumptions, and data sources.

178

179 **Table 2: Resources and unit costs**

*Currency: Malaysian ringgit (RM)*

| Cost element                                                                                         | Unit cost<br>(Per screen)<br>RM (I\$) | Assumptions                                                 | Source |
|------------------------------------------------------------------------------------------------------|---------------------------------------|-------------------------------------------------------------|--------|
| <b><i>Current practice (opportunistic screening)</i></b>                                             |                                       |                                                             |        |
| Performing screening (asking for symptoms, family history, referral) and taking sample               | 5.58                                  | 20 min x salary RM2947/month                                | 1      |
| Processing stool specimens                                                                           | 1.70                                  | 10 min x salary RM1797/month                                | 2      |
| Interpreting the test results                                                                        | 2.79                                  | 10 min x salary RM2947/month                                | 1      |
| Conveying a definitive diagnosis to patients (along with explaining treatment plan or referral etc.) | 8.37                                  | 30 min x salary RM2947/month                                | 1      |
| <b><i>Proposed practice (Population-based CRC screening programme)</i></b>                           |                                       |                                                             |        |
| Contact eligible individuals - agreed to participate                                                 | 0.98                                  | 7.1 min x (salary RM1440/month + mobile package RM20/month) | 3      |
| Contact eligible individuals - rejected/excluded to participate                                      | 0.47                                  | 3.4 min x (same as above)                                   | 3      |
| iFOBT rapid test kit                                                                                 | 6.90                                  |                                                             | 3      |
| Print materials (instruction leaflet, explanatory statement)                                         | 1.10                                  | 90 cents for colour print + 20 cent for black & white print | 3      |
| Postage (stamps, etc.)                                                                               | 5.35                                  |                                                             | 3      |
| Sending video through WhatsApp                                                                       | 0.41                                  | 3 min x (salary RM1440/month + mobile package RM20/month)   | 3      |
| Sending reminder text message                                                                        | 0.41                                  | 3 min x (same as above)                                     | 3      |
| Reminder call                                                                                        | 0.28                                  | 2 min x (same as above)                                     | 3      |
| Interpreting the test kit result                                                                     | 1.70                                  | 10 min x salary RM1797/month                                | 3      |
| Sending text message to inform patient of negative result                                            | 0.45                                  | 2 min x (salary RM2350/month + mobile package RM20/month)   | 3      |
| Calling patient to inform him/her of positive result                                                 | 0.67                                  | 3 min x (same as above)                                     | 3      |

Currency: Malaysian ringgit (RM)

| Cost element                                                                                                                                                                | Unit cost<br>(Per screen)<br>RM (I\$) | Assumptions                                                                                                                                                                                                                                            | Source |
|-----------------------------------------------------------------------------------------------------------------------------------------------------------------------------|---------------------------------------|--------------------------------------------------------------------------------------------------------------------------------------------------------------------------------------------------------------------------------------------------------|--------|
| Preparing and sending referral letter to patient/clinic                                                                                                                     | 1.12                                  | 5 min x (same as above)                                                                                                                                                                                                                                | 3      |
| Follow up effort                                                                                                                                                            | 6.73                                  | 30 min x (same as above)                                                                                                                                                                                                                               | 3      |
| Developing communication materials, <b>one-off cost</b>                                                                                                                     | 6,063                                 | Communication materials do not change in 5 years                                                                                                                                                                                                       | 3      |
| Training for data collectors*, <b>one-off cost</b>                                                                                                                          | 109,703                               | + 1 day training (virtual using Zoom)<br>+ 1 trainer for maximum 25 trainees<br>+ 1 data collector* is needed for every target population of 400<br>+ Cost=1-day-salary of trainer/trainees x number of trainer/trainees<br>+ No retraining in 5 years | 3      |
| <i>* Data collectors are those employed by the programme to (i) contact potential participants, (ii) deliver iFOBT test kits, and (iii) send a reminder to participants</i> |                                       |                                                                                                                                                                                                                                                        |        |
| <b>Same in both scenarios/practices</b>                                                                                                                                     |                                       |                                                                                                                                                                                                                                                        |        |
| Colonoscopy (including polyps removal and/or biopsy if needed)                                                                                                              | 200                                   |                                                                                                                                                                                                                                                        |        |
| Consumables – stool container, gloves, mask, plastic waste bag and disposal of materials from the test                                                                      | 10.80                                 | RM8636.7/800 sets                                                                                                                                                                                                                                      | 3      |

iFOBT: Immunochemical faecal occult blood test; RM: Malaysian ringgit

Source:

1. Public Services Commission of Malaysia. Medical Officer Grade UD41. Accessed at <https://www.spa.gov.my/spa/laman-utama/gaji-syarat-lantikan-deskripsi-tugas/ijazah-sarjana-phd/pegawai-perubatan-gred-ud41>
2. Public Services Commission of Malaysia. Medical laboratory technologist Grade U29. Accessed at [https://www.interactive.jpa.gov.my/ezskim/klasifikasi/perbekalanskim.asp?id\\_skim=3LU03](https://www.interactive.jpa.gov.my/ezskim/klasifikasi/perbekalanskim.asp?id_skim=3LU03)
3. Colorectal Cancer Screening Intervention for Malaysia (or CRC-SIM research project) in Segamat District, conducted by Queen's University Belfast, Monash University, and Southeast Asia Community Observatory (SEACO) in 2021

180

181 In the current practice of opportunistic screening, doctors were consulted about the estimated

182 time to perform each stage in the pathway. The monthly salary of a general doctor and a medical

183 laboratory technologist was based on the rate published by the Public Services Commission of

184 Malaysia [15, 16]. These rates were RM2,947 (~I\$2,045) and RM1,797 (~I\$1,247), respectively.

185 In the novel CRC screening programme, the time to perform each stage in the pathway, salary

186 of personnel, and costs of material resources (e.g., rapid kit test, consumables, postage, printing

187 materials) were based on the time and expenditure observed in the CRC-SIM research project.

10

1  
2  
3 188 All costs were calculated per screen except the cost of training and the cost of developing  
4  
5 189 communication materials which were one-off costs based on the assumption that  
6  
7 190 communication materials would not change, and no re-training would be needed within 5 years.  
8  
9  
10 191 It was assumed (based on the experience of operating the screening programme during the  
11  
12 192 CRC-SIM project) that one data collector (i.e., those employed by the programme to (i) contact  
13  
14 193 potential participants, (ii) deliver iFOBT test kits, and (iii) send a reminder to participants)  
15  
16 194 would be needed for every 400 people in the target population. Training would last one day  
17  
18 195 and would be delivered virtually; thus, the cost of training equalled (1-day-salary of trainer x  
19  
20 196 number of trainer) + (1-day-salary of trainees x number of trainees/data collectors).  
21  
22  
23  
24  
25

197

### 198 **Perspective and time horizon**

26  
27  
28 199 The BIA was conducted from the viewpoint of the federal government which finances  
29  
30 200 Malaysia's public health system [17]. Only those costs and resource requirements relevant to  
31  
32 201 the budget holder were included in the analysis. For example, the out-of-pocket expenditure  
33  
34 202 incurred by patients were excluded.  
35  
36  
37

203

38  
39  
40 204 The analysis estimated the annual financial impact over a period of five years as recommended  
41  
42 205 in the guidelines [10, 18]. Costs were not discounted given that the BIA methodology reports  
43  
44 206 the costs for each year in which they occur rather than a net present value [10].  
45  
46

207

208



1  
2  
3 209 **Budget impact analyses**  
4

5 210 *Computing framework and base-case analysis*  
6

7  
8 211 The BIA used a cost calculator programmed in Microsoft Excel, following the costing  
9  
10 212 template<sup>1</sup> produced by the National Institute for Health and Care Excellence in the UK (NICE).  
11  
12 213 The template was modified to fit the programme under assessment. The cost calculator  
13  
14 214 approach is recommended by guidelines as it is easy for stakeholders to understand and  
15  
16 215 replicate the results [10].  
17  
18

19 216  
20  
21 217 First, the number of individuals who completed each stage was estimated (Table 1). The  
22  
23 218 resources that were used at each stage of the respective pathways (in opportunistic screening  
24  
25 219 and the novel CRC screening programme) were listed along with their unit costs (i.e., cost of  
26  
27 220 each resource per person) (Table 2). Unit costs were multiplied by number of users to give the  
28  
29 221 total cost of resources for each scenario. The net budget impact was calculated as the difference  
30  
31 222 in cost between opportunistic screening and the CRC screening programme. Visual depiction  
32  
33 223 of the cost calculator is shown in Supplementary Material, Figure S1.  
34  
35  
36  
37  
38  
39

40 225 *Uncertainty and scenario analyses*  
41

42 226 The input assumptions (that were used to estimate the number of individuals at each stage of  
43  
44 227 the respective pathway) and the cost inputs were varied, and then the impact of these changes  
45  
46 228 in relation to the results was analysed to investigate the sensitivity of the budget impact results  
47  
48 229 to variations in individual input. As recommended by Gray et al. (2011), the range of variation  
49  
50 230 regarding parameters for which data sources about dispersion were unavailable were  $\pm 20\%$  of  
51  
52 231 the base case [19].  
53  
54  
55  
56  
57

---

58  
59 <sup>1</sup> The template can be freely downloaded at <https://www.nice.org.uk/Media/Default/About/what-we-do/our-programmes/evidence-standards-framework/budget-impact-template.xlsx>  
60

## 232 **Patient and public involvement**

233 It was not appropriate or possible to involve patients or the public in the design, or conduct, or  
234 reporting, or dissemination plans of our research as this type of study is a secondary analysis  
235 of data from a payer perspective (Ministry of Health Malaysia).

236

## 237 **RESULTS**

### 238 **Base-case analysis**

239 The total annual cost of the current practice of opportunistic screening is RM1,584,321  
240 (~I\$1,099,460), of which 80% (RM1,274,690 ~ I\$884,587) was for providing opportunistic  
241 CRC to adults who availed of the service. Costs of providing colonoscopy (including polyps  
242 removal and/or biopsy if needed) after receipt of a positive iFOBT and conveying definitive  
243 diagnosis to patients (along with explaining treatment plan or referral etc.) after the outcome  
244 of the colonoscopy were RM309,108 (~I\$214,509) and RM523 (~I\$363), respectively.

245

246 The total annual cost over a 5-year period of the proposed practice (i.e., CRC screening  
247 programme) is shown in Table 3. It was assumed that the number of people who would agree  
248 to participate in the programme would increase by 5% each year (in consideration of health  
249 promotion activities as well as information flows including word of mouth between  
250 participants). Therefore, the financial impact would also increase accordingly.

251

252

253 **Table 3: Annual cost of proposed practice (i.e., CRC screening programme)**

*Currency: Malaysian ringgit (RM) and International Dollar (I\$)*

| <b>Proposed practice</b>                                                                                                      | <b>Year 1</b><br>RM (I\$)          | <b>Year 2</b><br>RM (I\$)          | <b>Year 3</b><br>RM (I\$)          | <b>Year 4</b><br>RM (I\$)          | <b>Year 5</b><br>RM (I\$)           |
|-------------------------------------------------------------------------------------------------------------------------------|------------------------------------|------------------------------------|------------------------------------|------------------------------------|-------------------------------------|
| Contacting adults who are eligible for CRC screening programme (i.e., aged 50-75) and screen for eligibility of participating | 2,320,148<br>(1,610,096)           | 2,320,148<br>(1,610,096)           | 2,320,148<br>(1,610,096)           | 2,320,148<br>(1,610,096)           | 2,320,148<br>(1,610,096)            |
| Providing iFOBT test to adults who agreed to participate in CRC screening programme after being invited                       | 93,654,886<br>(64,992,981)         | 102,612,907<br>(71,209,512)        | 111,570,928<br>(77,426,043)        | 120,528,949<br>(83,642,574)        | 129,486,970<br>(89,859,105)         |
| Providing 1 <sup>st</sup> reminder to participants                                                                            | 536,929<br>(372,609)               | 588,286<br>(408,248)               | 639,643<br>(443,888)               | 690,999<br>(479,527)               | 742,356<br>(515,167)                |
| Providing 2 <sup>nd</sup> reminder to participants                                                                            | 315,339<br>(218,833)               | 345,501<br>(239,765)               | 375,663<br>(260,696)               | 405,825<br>(281,627)               | 435,987<br>(302,559)                |
| Interpreting returned iFOBT samples                                                                                           | 1,165,129<br>(808,556)             | 1,276,572<br>(885,893)             | 1,388,016<br>(963,231)             | 1,499,460<br>(1,040,569)           | 1,610,903<br>(1,117,906)            |
| Conveying result through message to participants with iFOBT negative result                                                   | 251,990<br>(174,872)               | 276,093<br>(191,598)               | 300,196<br>(208,324)               | 324,298<br>(225,050)               | 348,401<br>(241,777)                |
| Preparing and sending referral letter and calling participants with iFOBT POSITIVE result                                     | 221,356<br>(153,613)               | 242,529<br>(168,306)               | 263,701<br>(182,999)               | 284,874<br>(197,692)               | 306,046<br>(212,384)                |
| Following up participants who DID NOT take colonoscopy after positive iFOBT                                                   | 489,158<br>(339,457)               | 535,945<br>(371,926)               | 582,733<br>(404,394)               | 629,520<br>(436,863)               | 676,308<br>(469,332)                |
| Providing colonoscopy (including polyps removal and/or biopsy if needed) to participants with positive iFOBT                  | 10,127,147<br>(7,027,861)          | 11,095,801<br>(7,700,070)          | 12,064,455<br>(8,372,280)          | 13,033,109<br>(9,044,489)          | 14,001,764<br>(9,716,700)           |
| Conveying definitive diagnosis to patients (along with explaining treatment plan or referral etc.) after the colonoscopy      | 18,432<br>(12,791)                 | 20,195<br>(14,015)                 | 21,958<br>(15,238)                 | 23,721<br>(16,461)                 | 25,484<br>(17,685)                  |
| Capital costs (Developing communication materials + Training for data collectors)                                             | 115,766<br>(80,337)                | 115,766<br>(80,337)                | 115,766<br>(80,337)                | 115,766<br>(80,337)                | 115,766<br>(80,337)                 |
| <b>Total cost of proposed practice</b>                                                                                        | <b>109,216,279</b><br>(75,792,005) | <b>119,429,743</b><br>(82,879,766) | <b>129,643,206</b><br>(89,967,527) | <b>139,856,670</b><br>(97,055,288) | <b>150,070,133</b><br>(104,143,049) |

*CRC: Colorectal cancer; iFOBT: Immunochemical faecal occult blood test*

254

1  
2  
3 255 Similar to opportunistic screening, the cost to provide iFOBT to the eligible population who availed  
4  
5 256 of the service accounted for 86% of the total cost of the proposed CRC screening programme. The  
6  
7 257 second most costly component was the provision of colonoscopy (including polyps removal and/or  
8  
9 258 biopsy if needed) to patients with an iFOBT positive result, at 9% of the total cost. The remaining  
10  
11 259 nine cost components such as contacting potential participants, reminding participants to send  
12  
13 260 photograph of iFOBT result, conveying diagnosis to participants and the follow-up effort added  
14  
15 261 only up to 5% of the total cost.  
16  
17  
18  
19  
20

21 263 The net budget impact in the 1<sup>st</sup> year of implementing CRC screening programme would be  
22  
23 264 RM107,631,959 (~I\$74,692,546 which equalled the total cost of future practice minus the total  
24  
25 265 cost of current practice). The impact increases each year as the number of people who agree to  
26  
27 266 participate in the programme increase, reaching RM117,845,422 (~I\$81,780,307) in year 2,  
28  
29 267 RM128,058,885 (~I\$88,868,067) in year 3, RM138,272,349 (~I\$ 95,955,829) in year 4, and  
30  
31 268 RM148,485,812 (~I\$103,043,589) in year 5.  
32  
33  
34  
35  
36

37 270 The net budget impact of providing and delivering the CRC screening programme over the 5-year  
38  
39 271 timeframe for each state in Malaysia (calculated according to the population size of each state) can  
40  
41 272 be accessed in Supplementary Material, Table S1. These estimates aid service planning decisions  
42  
43 273 if the novel pilot programme is implemented in one or more of these states before being scaled up  
44  
45 274 into nationwide programme.  
46  
47  
48

49 275

## 51 276 **Uncertainty and scenario analyses**

52  
53 277 The tornado diagram in Figure 3 shows the change to net budget impact when assumptions and  
54  
55 278 cost inputs were varied. It presents the results of multiple univariate sensitive analyses on key  
56  
57 279 inputs that exert the most influence on the net budget impact (See Table S2, Supplementary  
58  
59  
60

1  
2  
3 280 Material for results of multiple univariate sensitive analysis on all inputs). These inputs include  
4  
5 281 the probability of (i) making successful contact with adults about the CRC screening programme,  
6  
7 282 (ii) adults agreeing to participate, (iii) adults being eligible to participate in the programme, and  
8  
9 283 (iv) the cost of consumables that are required to take a stool sample. The first three inputs  
10  
11  
12 284 influence the number of individuals who are present at each stage of the patient pathway.

13  
14  
15 285 (Figure 3 is about here)

16  
17 286 The net budget impact would increase from RM107 million to RM130 million (~I\$74-90  
18  
19 287 million) if there was a 20% increase in (i) the probability of adults who were contactable (from  
20  
21 288 a contact list of people aged 50-75 years old) or (ii) the probability of adults agreeing to  
22  
23 289 participate in the CRC screening programme or (iii) the probability of adults being eligible for  
24  
25 290 the programme (i.e., aged 50-75 years old; having no symptoms of CRC, a smartphone, and  
26  
27 291 WhatsApp; resident within programme area; and did not have colonoscopy this year). In other  
28  
29 292 words, a 20% increase in each one of these factors would require an additional RM23 million  
30  
31 293 (~I\$16 million) to be budgeted for the programme. Likewise, a 20% increase in the cost of the  
32  
33 294 consumables that are required for taking stool samples would mean that the programme would  
34  
35 295 cost RM15 million (~I\$10 million) more than the originally calculated total cost.  
36  
37  
38  
39

40 296

## 41 42 43 297 **DICUSSION**

44  
45  
46 298 The result of this analysis provides information to guide public health service planners and  
47  
48 299 commissioners in their decisions about an alternative CRC screening strategy i.e., a population-  
49  
50 300 based CRC screening programme using home-based iFOBT compared to current opportunistic  
51  
52 301 screening. It concluded that the net budget impact in the 1<sup>st</sup> year of implementing a CRC  
53  
54 302 screening programme of this kind would be RM107,631,959 (~I\$74,692,546). The impact  
55  
56 303 would increase by year due to increase in uptake and would reach RM148,485,812  
57  
58 304 (~I\$103,043,589) in the 5<sup>th</sup> year of implementation. This analytical approach and the results of  
59  
60

1  
2  
3 305 this analysis are presented as aids to better decision making by MoHs and stakeholders in  
4  
5 306 lower-middle-income countries (LMICs) about health programme planning and in this  
6  
7 307 particular illustrative case to the MoHM regarding the degree to which the proposed CRC  
8  
9 308 screening programme is affordable.

10  
11 309  
12  
13  
14 310 The total budget that was allocated to the MoHM in 2022 was RM32.4 billion (~I\$22.5 million)  
15  
16 311 [20]. Spending on prevention and public health services in 2009 was reported to be RM1.6  
17  
18 312 billion (~I\$1.1 million) [17]. More recent data and information about the size of the budget that  
19  
20 313 is allocated to cancer screening is not available. As such, it is estimated that the net budget  
21  
22 314 impact of implementing a CRC screening programme would account for between 7-10% of the  
23  
24 315 total budget for prevention and public health services. This represents a significant proportion  
25  
26 316 of the overall budget allocated for prevention programmes/interventions.

27  
28 317  
29  
30  
31 318 The key factor in the implementation of a population-based screening programme/service or the  
32  
33 319 factor that has biggest impact on the budget is the size of the population who use the service. The  
34  
35 320 degree of accuracy regarding population size estimates is related closely to the cost estimates in  
36  
37 321 the budget. It is important for service planners to keep this point in mind and to take into account  
38  
39 322 an increase in uptake and the impact of such an increase. Therefore, in the case of the CRC  
40  
41 323 programme presented here, we assumed a 5% increase annually in uptake and calculated the net  
42  
43 324 budget impact. The net budget impact can be recalculated according to the actual change in uptake  
44  
45 325 after the programme is implemented.

46  
47 326  
48  
49  
50  
51 327 Budget impact analysis is an economic assessment that is used to estimate the changes in  
52  
53 328 expenditure of a specific budget holder if a new health technology/programme is implemented  
54  
55 329 [10]. As such, BIA complements other health economic evaluation methods such as cost-

1  
2  
3 330 effectiveness analysis (CEA) to provide a comprehensive economic assessment of a health care  
4  
5 331 intervention to decision makers [10]. A BIA aids decision making by health service planners  
6  
7 332 and commissioners about whether an intervention or programme is affordable within given  
8  
9 333 budget constraints while a CEA informs decisions about whether an intervention is good value  
10  
11 334 for money [10, 21]. BIA and its pragmatic approach is an ideal method when a situation calls  
12  
13 335 for an evaluation of 'affordability' which is of central importance in LMICs and, arguably, is  
14  
15 336 the key concern of whoever is in charge of managing a health care budget [22, 23].  
16  
17  
18  
19  
20

21 338 It could well be that savings in earlier treatment would counterbalance the additional budget  
22  
23 339 impact. However, a BIA is not intended to provide answers to questions about whether or not,  
24  
25 340 in this context, the screening programme is good value for money as it does not take into  
26  
27 341 account the potential improvements in outcomes (e.g., increase quality-related life years) and  
28  
29 342 savings from lower treatment costs for CRC diagnosed at earlier stages. The conduct of other  
30  
31 343 types of economic evaluations such as a cost-effectiveness analysis would be required to  
32  
33 344 provide a complete and comprehensive set of evidence for decision makers.  
34  
35  
36  
37  
38  
39

40 346 Finally, the conduct of BIA in this paper has some limitations. First, assumptions and cost  
41  
42 347 inputs for the CRC screening programme were based on the costs and rates that were observed  
43  
44 348 in the CRC-SIM research project. The project was conducted in only one district (Segamat);  
45  
46 349 and the distribution of three main ethnic groups (i.e., Malay, Chinese, Indian) in the project  
47  
48 350 differed from the proportions that have been reported nation-wide (72%:24%:3% vs  
49  
50 351 62%:21%:6%, respectively). Therefore, it is important to be mindful of the possibility that the  
51  
52 352 assumptions and inputs (based on the project) may not be representative for, or read across to,  
53  
54 353 the whole population of Malaysia. Likewise, it is important to bear in mind that our findings  
55  
56 354 do not include the perspective of other payers and may not generalise to other settings. The  
57  
58  
59  
60



1  
2  
3 355 results are related directly to the context of the Malaysian health system and the epidemiology  
4  
5 356 of CRC in the country though they are illustrative of the positive contribution of the BIA  
6  
7  
8 357 methodology and approach.  
9

## 10 11 358 **CONCLUSIONS**

12  
13  
14 359 This study employed a BIA methodology to analyse the costs of a novel CRC screening  
15  
16 360 programme using home-based iFOBT and mHealth versus the current opportunistic screening.  
17  
18 361 The findings estimated the net budget impact of implementing a population-based national  
19  
20 362 CRC screening programme in Malaysia. The modelling estimations are important  
21  
22 363 considerations for health authorities when they are required to decide the affordability of  
23  
24 364 implementing a programme and to aid budgetary planning as well as decision making,  
25  
26 365 generally, about implementation. Our study illustrates the use and value of the BIA approach  
27  
28  
29 366 in LMICs and resource-constrained settings.  
30  
31

## 32 33 367 **Abbreviations**

|    |         |                                                                     |
|----|---------|---------------------------------------------------------------------|
| 34 | BIA     | Budget impact analysis                                              |
| 35 |         |                                                                     |
| 36 | CEA     | Cost-effectiveness analysis                                         |
| 37 |         |                                                                     |
| 38 | CRC     | Colorectal cancer                                                   |
| 39 |         |                                                                     |
| 40 | CRC-SIM | Colorectal Cancer Screening Intervention for Malaysia               |
| 41 |         |                                                                     |
| 42 | iFOBT   | Immunochemical faecal occult blood test                             |
| 43 |         |                                                                     |
| 44 | I\$     | International Dollar                                                |
| 45 |         |                                                                     |
| 46 | ISPOR   | The Professional Society for Health Economics and Outcomes Research |
| 47 |         |                                                                     |
| 48 | MoHM    | Ministry of Health of Malaysia                                      |
| 49 |         |                                                                     |
| 50 | NICE    | National Institute for Health and Care Excellence                   |
| 51 |         |                                                                     |
| 52 | RM      | Malaysian ringgit                                                   |
| 53 |         |                                                                     |
| 54 |         |                                                                     |
| 55 |         |                                                                     |
| 56 |         |                                                                     |
| 57 |         |                                                                     |
| 58 |         |                                                                     |
| 59 |         |                                                                     |
| 60 |         |                                                                     |



SEACO Southeast Asia Community Observatory

UK The United Kingdom

## 368 **DECLARATIONS**

369 **Research ethics approval.** Not applicable (This study does not involve human participants).

370 **Funding.** This research was supported by the Medical Research Council (UK) Global  
371 Challenges Research Fund (MR/S014349/1) and the National Medical Research Register  
372 Malaysia (NMRR ID-21-02045-O7G). The funder of the study had no role in study design,  
373 data collection, data analysis, data interpretation, or writing of the report.

374 **Competing interests.** The authors have no conflicts of interest to declare that are relevant to  
375 the content of this article.

376 **Availability of data and material.** All data generated or analysed during this study are  
377 included in this published article.

378 **Authors' contributions.** TTN: Methodology, Formal Analysis, Writing – Original draft, Writing –  
379 Review & Editing. KR, MRS, and DS: Data Curation, Investigation, Writing – Review & Editing. ST:  
380 Resources, Writing – Review & Editing. TTS, and MD: Conceptualization, Funding acquisition,  
381 Writing – Review & Editing, Supervision. CON: Methodology, Formal Analysis, Writing – Review &  
382 Editing, Supervision.

## 383 **REFERENCE**

- 384 1. Global Cancer Observatory: Cancer Today [Internet]. International Agency for  
385 Research on Cancer. 2020 [cited 12 April 2021]. Available from: <http://gco.iarc.fr/today>.
- 386 2. Malaysian National Cancer Registry Report 2012-2016 [Internet]. Ministry of Health  
387 Malaysia. 2020 [cited April 12, 2022].
- 388 3. Veettil SK, Lim KG, Chaiyakunapruk N, Ching SM, Abu Hassan MR. Colorectal  
389 cancer in Malaysia: Its burden and implications for a multiethnic country. *Asian Journal of*  
390 *Surgery*. 2017;40(6):481-9.
- 391 4. Rawla P, Sunkara T, Barsouk A. Epidemiology of colorectal cancer: incidence,  
392 mortality, survival, and risk factors. *Prz Gastroenterol*. 2019;14(2):89-103.
- 393 5. Tamin NSI, Razalli KA, Sallahuddin SN, Chan HK, Hassan MRA. A 5-year evaluation  
394 of using stool-based test for opportunistic colorectal cancer screening in primary health  
395 institutions across Malaysia. *Cancer epidemiology*. 2020;69:101829.

- 1  
2  
3 396 6. Ministry of Health Malaysia. Clinical Practice Guidelines – Management of Colorectal  
4 397 Carcinoma. Putrajaya: Malaysia Health Technology Assessment Section (MaHTAS); 2017.
- 5 398 7. Schliemann D, Ramanathan K, Ibrahim Tamin NSB, Neill C, Cardwell CR, Ismail R,  
6 399 et al. Implementation of a colorectal cancer screening intervention in Malaysia (CRC-SIM) in  
7 400 the context of a pandemic: study protocol. *BMJ Open*. 2022;12(9):e058420.
- 8 401 8. Issa IA, Nouredine M. Colorectal cancer screening: An updated review of the  
9 402 available options. *World journal of gastroenterology*. 2017;23(28):5086-96.
- 10 403 9. Mauskopf JA, Sullivan SD, Annemans L, Caro J, Mullins CD, Nuijten M, et al.  
11 404 Principles of good practice for budget impact analysis: report of the ISPOR Task Force on good  
12 405 research practices--budget impact analysis. *Value Health*. 2007;10(5):336-47.
- 13 406 10. Sullivan SD, Mauskopf JA, Augustovski F, Jaime Caro J, Lee KM, Minchin M, et al.  
14 407 Budget impact analysis-principles of good practice: report of the ISPOR 2012 Budget Impact  
15 408 Analysis Good Practice II Task Force. *Value Health*. 2014;17(1):5-14.
- 16 409 11. World Economic Outlook Databases [Internet]. 2022 [cited April 13]. Available from:  
17 410 [https://www.imf.org/en/Publications/SPROLLS/world-economic-outlook-](https://www.imf.org/en/Publications/SPROLLS/world-economic-outlook-databases#sort=%40imfdate%20descending)  
18 411 [databases#sort=%40imfdate%20descending](https://www.imf.org/en/Publications/SPROLLS/world-economic-outlook-databases#sort=%40imfdate%20descending).
- 19 412 12. Budget impact analysis of a population-based screening programme for colorectal  
20 413 cancer in Malaysia: technical report of a modelling study [Internet]. Centre for Public Health,  
21 414 Queen's University Belfast. 2022 [cited July 1]. Available from:  
22 415 [https://pure.qub.ac.uk/en/publications/budget-impact-analysis-of-a-population-based-](https://pure.qub.ac.uk/en/publications/budget-impact-analysis-of-a-population-based-screening-programme-)  
23 416 [screening-programme-](https://pure.qub.ac.uk/en/publications/budget-impact-analysis-of-a-population-based-screening-programme-).
- 24 417 13. Malaysia Population Pyramid 2022 [Internet]. *World Population Review*. [cited Jan 21,  
25 418 2022]. Available from: <https://worldpopulationreview.com/countries/malaysia-population>.
- 26 419 14. Demographic Statistics Factsheet [Internet]. Department Statistics of Malaysia. 2021  
27 420 [cited Jan 21, 2022]. Available from:  
28 421 [https://www.dosm.gov.my/v1/index.php?r=column/cthemByCat&cat=430&bul\\_id=N05ydDR](https://www.dosm.gov.my/v1/index.php?r=column/cthemByCat&cat=430&bul_id=N05ydDR)  
29 422 [XR1BJWVITdDY4TldHd253dz09&menu\\_id=L0pheU43NWJwRWVVSZklWdzQ4TlhUUT09](https://www.dosm.gov.my/v1/index.php?r=column/cthemByCat&cat=430&bul_id=N05ydDR).
- 30 423 15. Medical Officer Grade UD41 [Internet]. Public Services Commission of Malaysia.  
31 424 [cited January 27, 2022]. Available from: [https://www.spa.gov.my/spa/laman-utama/gaji-](https://www.spa.gov.my/spa/laman-utama/gaji-syarat-lantikan-deskripsi-tugas/ijazah-sarjana-phd/pegawai-perubatan-gred-ud41)  
32 425 [syarat-lantikan-deskripsi-tugas/ijazah-sarjana-phd/pegawai-perubatan-gred-ud41](https://www.spa.gov.my/spa/laman-utama/gaji-syarat-lantikan-deskripsi-tugas/ijazah-sarjana-phd/pegawai-perubatan-gred-ud41).
- 33 426 16. Medical laboratory technologist Grade U29 [Internet]. Public Services Commission of  
34 427 Malaysia. [cited January 27, 2022]. Available from:  
35 428 [https://www.interactive.jpa.gov.my/ezskim/klasifikasi/perbekalanskim.asp?id\\_skim=3LU03](https://www.interactive.jpa.gov.my/ezskim/klasifikasi/perbekalanskim.asp?id_skim=3LU03).
- 36 429 17. Jaafar S, Noh KM, Muttalib KA, Othman NH, Healy J. Malaysia Health System  
37 430 Review. Asia Pacific Observatory on Health Systems and Policies; 2013.
- 38 431 18. Health Information and Quality Authority. Guidelines for the budget impact analysis of  
39 432 health technologies in Ireland. 2018.
- 40 433 19. M.Gray A, Clarke PM, Wolstenholme JL, Wordsworth S. Applied Methods of Cost-  
41 434 effectiveness Analysis in Health Care. Gray AM, Briggs A, editors. New York: Oxford  
42 435 University Press; 2011.
- 43 436 20. Ministry of Finance Malaysia. Budget 2022: RM32.4 billion allocation for MOH.  
44 437 Official Portal of Ministry of Finance Malaysia. 2021 [cited 2022 April 13]. Available from:  
45 438 [https://www.mof.gov.my/portal/en/news/press-citations/budget-2022-rm32-4-billion-](https://www.mof.gov.my/portal/en/news/press-citations/budget-2022-rm32-4-billion-allocation-for-moh)  
46 439 [allocation-for-moh](https://www.mof.gov.my/portal/en/news/press-citations/budget-2022-rm32-4-billion-allocation-for-moh).
- 47 440 21. Leelahavarong P. Budget Impact Analysis. *J Med Assoc Thai*. 2014;97(Suppl. 5):S65-  
48 441 S71.
- 49 442 22. Orlewska E, Gulácsi L. Budget-Impact Analyses: A Critical Review of Published  
50 443 Studies. *PharmacoEconomics*. 2009;27(10):807-27.
- 51 444 23. Garattini L, van de Vooren K. Budget impact analysis in economic evaluation: a  
52 445 proposal for a clearer definition. *The European Journal of Health Economics*. 2011;12(6):499.

1  
2  
3 446 **Figure Legends and Tables**  
4

5  
6 447 Table 1 Input assumptions used to estimate the population at each stage of the patient pathways  
7

8 448 Table 2 Resources and unit costs  
9

10 449 Table 3 Annual cost of proposed practice (i.e., CRC screening programme)  
11  
12

13 450

14  
15 451 Figure 1 Patient pathways in 'usual care' practice - opportunistic screening for CRC  
16

17 452 Figure 2 Patient pathway in population-based CRC screening programme  
18

19 453 Figure 3 Results of multiple univariate sensitive analyses showing key factors that exert most  
20

21 influence the net budget impact  
22  
23

24 455

25  
26 456 **Supplementary material**  
27

28 457 Figure S1 Visual depiction of the budget impact cost calculator  
29

30 458 Table S1 Net budget impact of CRC screening programme over 5-year timeframe, by state  
31  
32

33 459 Table S2 Sensitivity of the total budget impact of CRC screening programme to changes in  
34

35 each variable individually  
36  
37  
38  
39  
40  
41  
42  
43  
44  
45  
46  
47  
48  
49  
50  
51  
52  
53  
54  
55  
56  
57  
58  
59  
60

**Figure 1: Patient pathway in 'usual care' practice - opportunistic screening for CRC**



**Figure 2: Patient pathway in population-based CRC screening programme**

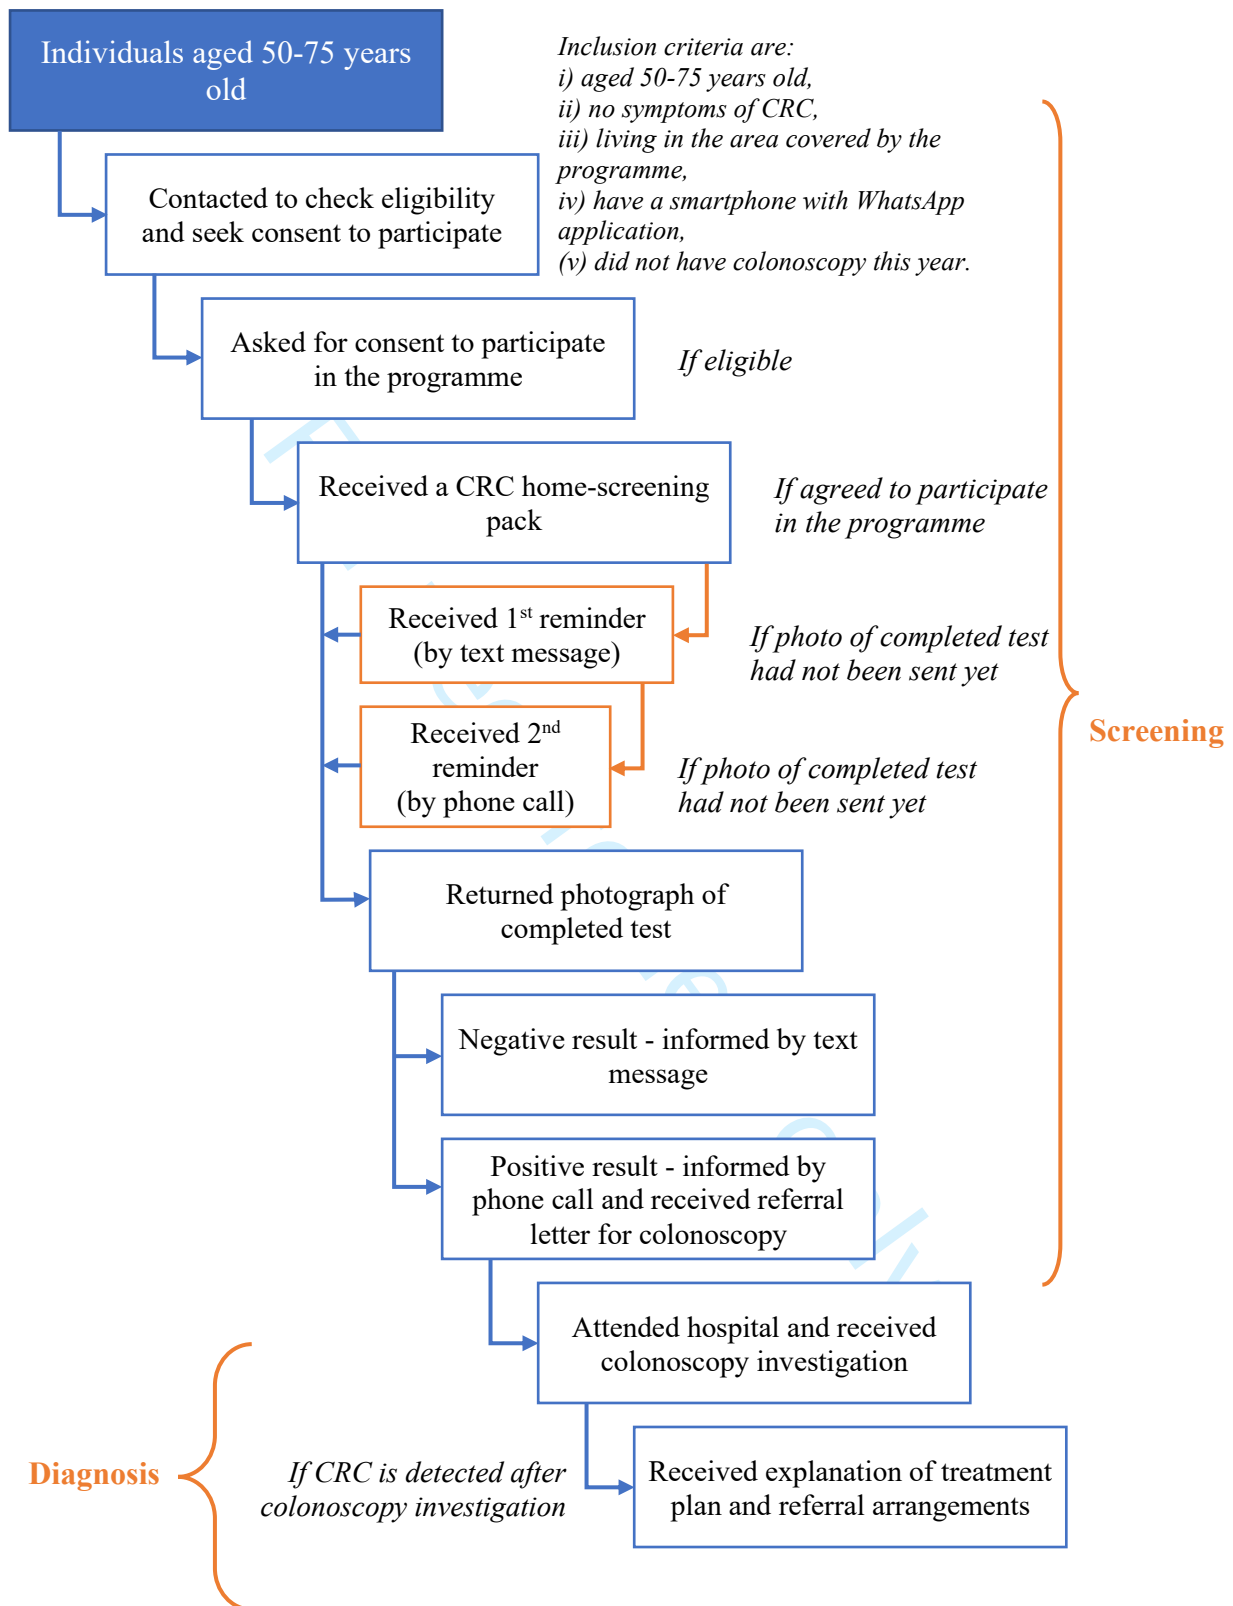

**Figure 3: Results of multiple univariate sensitive analyses showing key factors that exert most influence the net budget impact**

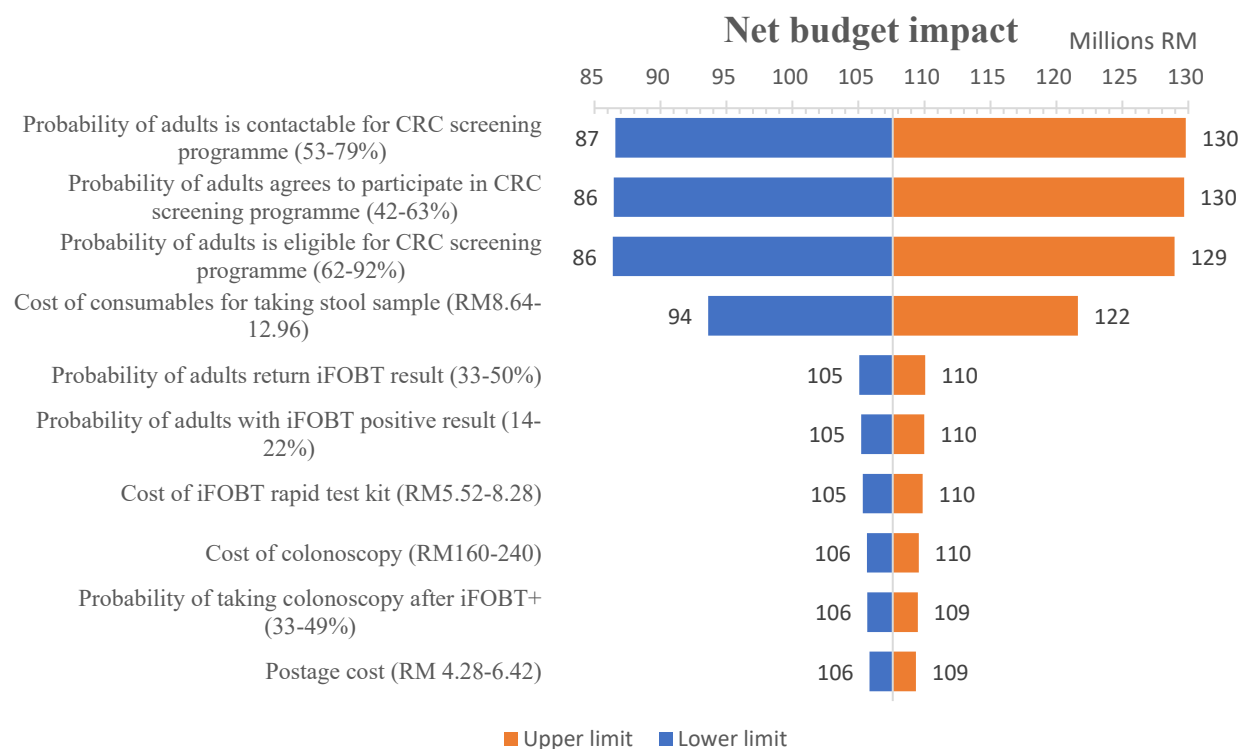

Review only

Supplementary material

Figure S1: Visual depiction of the budget impact cost calculator

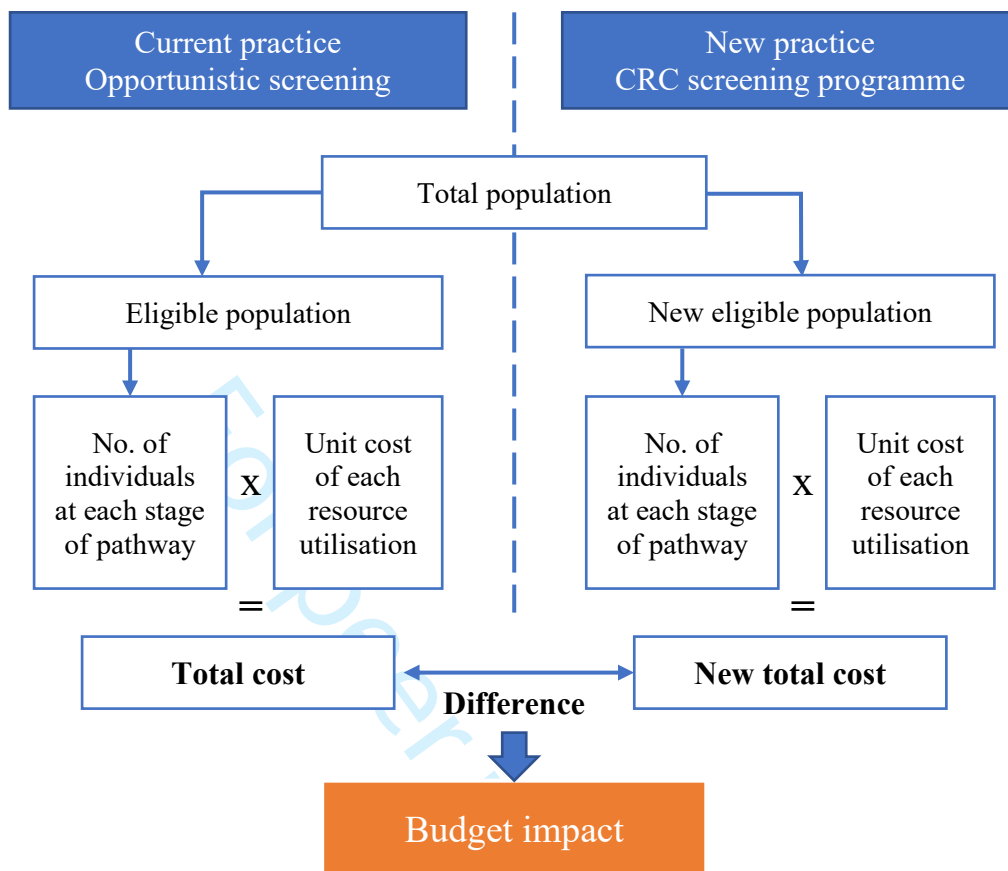

## Supplementary material

**Table S1: Net budget impact of CRC screening programme over 5-year timeframe, by state**

Currency: Malaysian ringgit

| State                    | Population        | Year 1             | Year 2             | Year 3             | Year 4             | Year 5             |
|--------------------------|-------------------|--------------------|--------------------|--------------------|--------------------|--------------------|
| <b>Johor</b>             | 3,822,800         | 12,597,041         | 13,791,897         | 14,986,752         | 16,181,607         | 17,376,462         |
| <b>Kedah</b>             | 2,206,200         | 7,272,541          | 7,962,112          | 8,651,682          | 9,341,252          | 10,030,823         |
| <b>Kelantan</b>          | 1,884,300         | 6,212,311          | 6,801,268          | 7,390,225          | 7,979,183          | 8,568,140          |
| <b>Melaka</b>            | 934,700           | 3,084,637          | 3,376,787          | 3,668,937          | 3,961,087          | 4,253,238          |
| <b>Negeri Sembilan</b>   | 1,141,000         | 3,764,122          | 4,120,753          | 4,477,384          | 4,834,016          | 5,190,647          |
| <b>Pahang</b>            | 1,702,900         | 5,614,833          | 6,147,092          | 6,679,351          | 7,211,609          | 7,743,868          |
| <b>Perak</b>             | 2,569,300         | 8,468,450          | 9,271,511          | 10,074,572         | 10,877,633         | 11,680,693         |
| <b>Pulau Pinang</b>      | 1,767,100         | 5,826,301          | 6,378,626          | 6,930,951          | 7,483,276          | 8,035,601          |
| <b>Sabah</b>             | 3,919,600         | 12,915,864         | 14,140,975         | 15,366,086         | 16,591,197         | 17,816,308         |
| <b>Sarawak</b>           | 2,829,400         | 9,325,144          | 10,209,501         | 11,093,859         | 11,978,217         | 12,862,575         |
| <b>Terengganu</b>        | 1,245,300         | 4,107,648          | 4,496,879          | 4,886,111          | 5,275,342          | 5,664,573          |
| <b>Perlis</b>            | 253,500           | 841,028            | 920,262            | 999,496            | 1,078,730          | 1,157,964          |
| <b>W.P. Kuala Lumpur</b> | 1,790,100         | 5,902,043          | 6,461,557          | 7,021,071          | 7,580,585          | 8,140,099          |
| <b>W.P. Labuan</b>       | 99,000            | 332,138            | 363,081            | 394,024            | 424,968            | 455,911            |
| <b>W.P. Putrajaya</b>    | 97,100            | 325,886            | 356,236            | 386,585            | 416,935            | 447,284            |
| <b>Nation-wide</b>       | <b>32,676,786</b> | <b>107,631,959</b> | <b>117,845,422</b> | <b>128,058,885</b> | <b>138,272,349</b> | <b>148,485,812</b> |

CRC: Colorectal cancer | W.P.: The Federal Territories (Malay: Wilayah Persekutuan)

Readers can convert from Malaysian Ringgit to their currency of interest (e.g., International Dollar, US Dollar, British Pound, Euro etc.) using the free web-based tool ‘CCEMG – EPPI-Centre Cost Converter’ (<https://eppi.ioe.ac.uk/costconversion/default.aspx>). This tool help adjusting estimates of cost expressed in one currency and price year to a specific target currency and price year.



## Supplementary material

**Table S2: Sensitivity of the total budget impact of CRC screening programme to changes in each variable individually**

Baseline budget impact=RM107,631,959

**Unit: Thousand Ringgit Malaysia**

|                                                                                                         | <b>Baseline value</b> | <b>Min value (-20% from baseline)</b> | <b>Max value (+20% from baseline)</b> | <b>Min budget impact</b> | <b>Max budget impact</b> | <b>Change</b> |
|---------------------------------------------------------------------------------------------------------|-----------------------|---------------------------------------|---------------------------------------|--------------------------|--------------------------|---------------|
| Probability of adults is contactable for CRC screening programme                                        | 66%                   | 53%                                   | 79%                                   | 86,574                   | 129,818                  | 43,244        |
| Probability of adults is included (eligible for CRC screening programme)                                | 77%                   | 62%                                   | 92%                                   | 86,386                   | 128,950                  | 42,564        |
| Probability of adults agree to participate in CRC screening programme after being invited               | 52%                   | 42%                                   | 63%                                   | 86,454                   | 129,675                  | 43,221        |
| Probability of adults needing 1st reminder                                                              | 79%                   | 63%                                   | 94%                                   | 107,430                  | 107,766                  | 336           |
| Probability of adults needing 2nd reminder                                                              | 88%                   | 70%                                   | 100%                                  | 107,535                  | 107,643                  | 108           |
| Probability of adults return iFOBT result                                                               | 42%                   | 33%                                   | 50%                                   | 105,062                  | 110,060                  | 4,998         |
| Probability of adults with iFOBT positive result                                                        | 18%                   | 14%                                   | 22%                                   | 105,204                  | 109,988                  | 4,784         |
| Probability of adults taking colonoscopy after positive iFOBT                                           | 41%                   | 33%                                   | 49%                                   | 105,673                  | 109,493                  | 3,820         |
| Probability of adults with CRC detection after getting colonoscopy                                      | 4%                    | 3%                                    | 5%                                    | 107,594                  | 107,603                  | 9             |
| Cost to perform the screening (asking for symptoms, family history, referral)                           | 5.58                  | 4.47                                  | 6.70                                  | 107,633                  | 107,567                  | -66           |
| Cost of stool specimen processing                                                                       | 1.70                  | 1.36                                  | 2.04                                  | 107,610                  | 107,590                  | -20           |
| Interpretation of results                                                                               | 2.79                  | 2.23                                  | 3.35                                  | 107,617                  | 107,583                  | -34           |
| Cost to convey definitive diagnosis to patients (along with explaining treatment plan or referral etc.) | 8.37                  | 6.70                                  | 10.05                                 | 107,597                  | 107,604                  | 7             |
| Contact eligible individuals - agreed to participate                                                    | 0.98                  | 0.79                                  | 1.18                                  | 107,285                  | 107,926                  | 641           |
| Contact eligible individuals - rejected/excluded to participate                                         | 0.47                  | 0.38                                  | 0.56                                  | 107,465                  | 107,735                  | 270           |
| iFOBT rapid test kit (only the rapid test kit itself)                                                   | 6.90                  | 5.52                                  | 8.28                                  | 105,331                  | 109,870                  | 4,539         |
| Print materials (instruction leaflet, explanatory statement)                                            | 1.10                  | 0.88                                  | 1.32                                  | 107,238                  | 107,962                  | 724           |
| Postage (stamp etc.)                                                                                    | 5.35                  | 4.28                                  | 6.42                                  | 105,840                  | 109,360                  | 3,520         |
| Sending video through Whatapp                                                                           | 0.41                  | 0.33                                  | 0.50                                  | 107,461                  | 107,740                  | 279           |
| Sending reminder text message                                                                           | 0.41                  | 0.33                                  | 0.50                                  | 107,490                  | 107,710                  | 220           |
| Reminder call                                                                                           | 0.28                  | 0.22                                  | 0.33                                  | 107,536                  | 107,661                  | 125           |
| Interpret the test kit result                                                                           | 1.70                  | 1.36                                  | 2.04                                  | 107,366                  | 107,832                  | 466           |

Supplementary material

*Unit: Thousand Ringgit Malaysia*

|                                                                                                        | <b>Baseline value</b> | <b>Min value (-20% from baseline)</b> | <b>Max value (+20% from baseline)</b> | <b>Min budget impact</b> | <b>Max budget impact</b> | <b>Change</b> |
|--------------------------------------------------------------------------------------------------------|-----------------------|---------------------------------------|---------------------------------------|--------------------------|--------------------------|---------------|
| Sending text message informing negative result                                                         | 0.45                  | 0.36                                  | 0.54                                  | 107,550                  | 107,651                  | 101           |
| Call to inform positive result                                                                         | 0.41                  | 0.33                                  | 0.50                                  | 107,590                  | 107,611                  | 21            |
| Prepare and send referral letter                                                                       | 1.12                  | 0.90                                  | 1.35                                  | 107,573                  | 107,628                  | 55            |
| Follow up effort                                                                                       | 6.73                  | 5.39                                  | 8.08                                  | 107,503                  | 107,698                  | 195           |
| Colonoscopy                                                                                            | 200                   | 160                                   | 240                                   | 105,638                  | 109,564                  | 3,926         |
| Consumables – stool container, gloves, mask, plastic waste bag and disposal of materials from the test | 10.80                 | 8.64                                  | 12.96                                 | 93,612                   | 121,641                  | 28,029        |

1 ISPOR—The Professional Society for Health Economics and Outcomes Research

2  
3 **Budget Impact Analysis—Principles of Good Practice: Report of the ISPOR**  
4 **2012 Budget Impact Analysis Good Practice II Task Force**  
5

6  
7 Citation: Sullivan SD, Mauskopf JA, Augustovski F, Jaime Caro J, Lee KM, Minchin M, Orlewska E, Penna  
8 P, Rodriguez Barrios JM, Shau WY. Budget impact analysis-principles of good practice: report of the  
9 ISPOR 2012 Budget Impact Analysis Good Practice II Task Force. Value Health. 2014 Jan-Feb;17(1):5-  
10 14. doi: <https://doi.org/10.1016/j.jval.2013.08.2291>  
11  
12

13 **Recommendations for Reporting Format**  
14

| Section/topic                                 | Guidance for reporting                                                                                                                                                                                                 | Reported in section                                                                          |
|-----------------------------------------------|------------------------------------------------------------------------------------------------------------------------------------------------------------------------------------------------------------------------|----------------------------------------------------------------------------------------------|
| <b>Introduction</b>                           |                                                                                                                                                                                                                        |                                                                                              |
| Objectives                                    | The objective of the BIA should be clearly stated and tied to the study perspectives                                                                                                                                   | Introduction                                                                                 |
| Epidemiology and management of health problem | Present information about the prevalence and incidence of the particular disease, disease severity, disease progression, undiagnosed or undertreated cases, and risk factors pertinent to estimating the budget impact | Introduction                                                                                 |
| Clinical impact                               | Consist of a brief description of the eligible population and existing management options and their efficacy and safety that are relevant to the design of the study of the BIA                                        | Introduction                                                                                 |
| Economic impact                               | Include a brief description of previous BIAs in the condition of interest for another intervention and condition-specific treatment patterns and cost-of-care studies                                                  | Not applicable (No previous BIA)                                                             |
| <b>Study Design and Methods</b>               |                                                                                                                                                                                                                        |                                                                                              |
| Patient population                            | Specify the eligible population for the new intervention                                                                                                                                                               | Methods<br>Sub-section: Eligible population and input assumptions<br>Table 1                 |
| Intervention mix                              | Contain a detailed description of the use and characteristics of each intervention in the current intervention mix and in the expected intervention mix after the introduction of the new intervention                 | Methods<br>Sub-section: Health service under assessment and its comparator<br>Figure 1 and 2 |
| Time horizon                                  | Should be presented and the choice(s) justified                                                                                                                                                                        | Methods<br>Sub-section: Perspective and time horizon                                         |
| Perspective                                   | Identify the BIAs' perspective(s), the cost categories included, and the intended audience                                                                                                                             | Methods<br>Perspective and time horizon                                                      |

## ISPOR—The Professional Society for Health Economics and Outcomes Research

| Section/topic                           | Guidance for reporting                                                                                                                                                                                                                                                                                                                                                                                          | Reported in section                                                                             |
|-----------------------------------------|-----------------------------------------------------------------------------------------------------------------------------------------------------------------------------------------------------------------------------------------------------------------------------------------------------------------------------------------------------------------------------------------------------------------|-------------------------------------------------------------------------------------------------|
| Analytic framework description          | Complete description of the structure of the BIA cost calculator or condition-specific cohort or individual simulation model                                                                                                                                                                                                                                                                                    | Methods<br>Sub-section: Eligible population and input assumptions                               |
| Input data                              | Input values used for the reported analyses, including alternative scenarios, should be presented                                                                                                                                                                                                                                                                                                               | Methods<br>Sub-section: Cost input and data sources<br>Table 2                                  |
| Data sources                            | The sources of data inputs should be described in detail                                                                                                                                                                                                                                                                                                                                                        | Methods<br>Sub-section: Cost input and data sources<br>Table 2                                  |
| Data collection                         | The methods and processes for any primary data collection and data abstraction tasks not reported elsewhere should be described and explained.                                                                                                                                                                                                                                                                  | Not applicable (secondary data)                                                                 |
| Analyses                                | A description of the calculations used to complete the BIA should be provided. The choice of all the scenarios presented in the results should be documented and justified.                                                                                                                                                                                                                                     | Methods<br>Sub-section: Computing framework and base-case analysis under budget impact analyses |
| Uncertainty                             | Uncertainty analysis methods should be described and justified                                                                                                                                                                                                                                                                                                                                                  | Methods<br>Sub-sections:<br>Uncertainty and scenario analyses under budget impact analyses      |
| <b>Results</b>                          | The budget impact should be presented for each budget period over the time horizon. Both budget period resource use and costs should be presented. The estimates of resource use should be listed in a table that shows the change in use for each time period reported in the BIA<br><br>The results of the uncertainty analyses and scenarios analyzed should be described and presented in figures or tables | Results<br>Table 3<br><br>Results<br>Figure 2                                                   |
| <b>Conclusions and Limitations</b>      | State the main conclusions on the basis of the results of the BIA.<br>Report the main limitations regarding key issues such as design aspects including off-label use and adherence assumptions and the completeness and quality of data inputs and sources.                                                                                                                                                    | Discussion<br><br>Conclusion                                                                    |
| <b>Inclusion of Graphics and Tables</b> |                                                                                                                                                                                                                                                                                                                                                                                                                 |                                                                                                 |
| Figure of the analytical framework      | Flow diagrams or other visual depictions of the cost calculator or condition-specific cohort or individual simulation model are recommended to be included with the analytical framework description.                                                                                                                                                                                                           | Supplementary material<br>Figure S1                                                             |

## ISPOR—The Professional Society for Health Economics and Outcomes Research

| Section/topic                                    | Guidance for reporting                                                                                                                                                                                                          | Reported in section |
|--------------------------------------------------|---------------------------------------------------------------------------------------------------------------------------------------------------------------------------------------------------------------------------------|---------------------|
| Table of assumptions                             | All the major assumptions should be listed in a tabular form                                                                                                                                                                    | Table 1             |
| Tables of inputs                                 | All the input parameter values and their data sources and derivations should be presented in a tabular form                                                                                                                     | Table 2             |
| Tables of outputs                                | All outputs should be presented in a tabular and/or graphical Form                                                                                                                                                              | Table 3             |
| Schematic representation of uncertainty analyses | Diagrams such as Tornado diagrams should be included along with the text on the results of the scenario analyses                                                                                                                | Figure 3            |
| Appendices and References                        | The appendices may cover literature search strategies, evidence summaries, intermediate results (e.g., of individual Delphi panel rounds), and the names and addresses of participating experts and investigators, for example. | Reference           |

## CHEERS 2022 Checklist

| Topic                                | No. | Item                                                                                                                            | Location where item is reported      |
|--------------------------------------|-----|---------------------------------------------------------------------------------------------------------------------------------|--------------------------------------|
| <b>Title</b>                         |     |                                                                                                                                 |                                      |
|                                      | 1   | Identify the study as an economic evaluation and specify the interventions being compared.                                      | Title page, Page 1                   |
| <b>Abstract</b>                      |     |                                                                                                                                 |                                      |
|                                      | 2   | Provide a structured summary that highlights context, key methods, results, and alternative analyses.                           | Abstract, Page 1                     |
| <b>Introduction</b>                  |     |                                                                                                                                 |                                      |
| <b>Background and objectives</b>     | 3   | Give the context for the study, the study question, and its practical relevance for decision making in policy or practice.      | Introduction, Line 65-69             |
| <b>Methods</b>                       |     |                                                                                                                                 |                                      |
| <b>Health economic analysis plan</b> | 4   | Indicate whether a health economic analysis plan was developed and where available.                                             | Not applicable                       |
| <b>Study population</b>              | 5   | Describe characteristics of the study population (such as age range, demographics, socioeconomic, or clinical characteristics). | Methods, Line 123-152, Table 1       |
| <b>Setting and location</b>          | 6   | Provide relevant contextual information that may influence findings.                                                            | Methods, Line 79-92                  |
| <b>Comparators</b>                   | 7   | Describe the interventions or strategies being compared and why chosen.                                                         | Methods, Line 79-121, Figure 1 and 2 |
| <b>Perspective</b>                   | 8   | State the perspective(s) adopted by the study and why chosen.                                                                   | Methods, Line 199-202                |
| <b>Time horizon</b>                  | 9   | State the time horizon for the study and why appropriate.                                                                       | Methods, Line 204-205                |
| <b>Discount rate</b>                 | 10  | Report the discount rate(s) and reason chosen.                                                                                  | Methods, Line 205-206                |
| <b>Selection of outcomes</b>         | 11  | Describe what outcomes were used as the measure(s) of benefit(s) and harm(s).                                                   | Not applicable                       |

| Topic                                                                        | No. | Item                                                                                                                                                                          | Location where item is reported                           |
|------------------------------------------------------------------------------|-----|-------------------------------------------------------------------------------------------------------------------------------------------------------------------------------|-----------------------------------------------------------|
| <b>Measurement of outcomes</b>                                               | 12  | Describe how outcomes used to capture benefit(s) and harm(s) were measured.                                                                                                   | Not applicable                                            |
| <b>Valuation of outcomes</b>                                                 | 13  | Describe the population and methods used to measure and value outcomes.                                                                                                       | Not applicable                                            |
| <b>Measurement and valuation of resources and costs</b>                      | 14  | Describe how costs were valued.                                                                                                                                               | Methods, Line 159-196                                     |
| <b>Currency, price date, and conversion</b>                                  | 15  | Report the dates of the estimated resource quantities and unit costs, plus the currency and year of conversion.                                                               | Methods, Line 73-76                                       |
| <b>Rationale and description of model</b>                                    | 16  | If modelling is used, describe in detail and why used. Report if the model is publicly available and where it can be accessed.                                                | Not applicable                                            |
| <b>Analytics and assumptions</b>                                             | 17  | Describe any methods for analysing or statistically transforming data, any extrapolation methods, and approaches for validating any model used.                               | Methods, Line 211-221, Figure S1 (Supplementary Material) |
| <b>Characterising heterogeneity</b>                                          | 18  | Describe any methods used for estimating how the results of the study vary for subgroups.                                                                                     | Not applicable                                            |
| <b>Characterising distributional effects</b>                                 | 19  | Describe how impacts are distributed across different individuals or adjustments made to reflect priority populations.                                                        | Not applicable                                            |
| <b>Characterising uncertainty</b>                                            | 20  | Describe methods to characterise any sources of uncertainty in the analysis.                                                                                                  | Methods, Line 224-229, Figure S2 (Supplementary Material) |
| <b>Approach to engagement with patients and others affected by the study</b> | 21  | Describe any approaches to engage patients or service recipients, the general public, communities, or stakeholders (such as clinicians or payers) in the design of the study. | Methods, Line 233-235                                     |
| <b>Results</b>                                                               |     |                                                                                                                                                                               |                                                           |
| <b>Study parameters</b>                                                      | 22  | Report all analytic inputs (such as values, ranges, references) including uncertainty or distributional assumptions.                                                          | Table 1 and 2, Table S2 (Supplementary Material)          |
| <b>Summary of main results</b>                                               | 23  | Report the mean values for the main categories of costs and outcomes of interest and summarise them in the most appropriate overall measure.                                  | Results, Line 239-274, Table 3                            |

| Topic                                                                       | No. | Item                                                                                                                                                                     | Location where item is reported |
|-----------------------------------------------------------------------------|-----|--------------------------------------------------------------------------------------------------------------------------------------------------------------------------|---------------------------------|
| <b>Effect of uncertainty</b>                                                | 24  | Describe how uncertainty about analytic judgments, inputs, or projections affect findings. Report the effect of choice of discount rate and time horizon, if applicable. | Results, Line 277-295, Figure 3 |
| <b>Effect of engagement with patients and others affected by the study</b>  | 25  | Report on any difference patient/service recipient, general public, community, or stakeholder involvement made to the approach or findings of the study                  | Not applicable                  |
| <b>Discussion</b>                                                           |     |                                                                                                                                                                          |                                 |
| <b>Study findings, limitations, generalisability, and current knowledge</b> | 26  | Report key findings, limitations, ethical or equity considerations not captured, and how these could affect patients, policy, or practice.                               | Discussion                      |
| <b>Other relevant information</b>                                           |     |                                                                                                                                                                          |                                 |
| <b>Source of funding</b>                                                    | 27  | Describe how the study was funded and any role of the funder in the identification, design, conduct, and reporting of the analysis                                       | End of manuscript               |
| <b>Conflicts of interest</b>                                                | 28  | Report authors conflicts of interest according to journal or International Committee of Medical Journal Editors requirements.                                            | End of manuscript               |

From: Husereau D, Drummond M, Augustovski F, et al. Consolidated Health Economic Evaluation Reporting Standards 2022 (CHEERS 2022) Explanation and Elaboration: A Report of the ISPOR CHEERS II Good Practices Task Force. Value Health 2022;25. doi:10.1016/j.jval.2021.10.008



# BMJ Open

## A budget impact analysis of a home-based colorectal cancer screening programme in Malaysia

|                                 |                                                                                                                                                                                                                                                                                                                                                                                                                                                                                                                                                                                                                                                                                                                                                                                                                                            |
|---------------------------------|--------------------------------------------------------------------------------------------------------------------------------------------------------------------------------------------------------------------------------------------------------------------------------------------------------------------------------------------------------------------------------------------------------------------------------------------------------------------------------------------------------------------------------------------------------------------------------------------------------------------------------------------------------------------------------------------------------------------------------------------------------------------------------------------------------------------------------------------|
| Journal:                        | <i>BMJ Open</i>                                                                                                                                                                                                                                                                                                                                                                                                                                                                                                                                                                                                                                                                                                                                                                                                                            |
| Manuscript ID                   | bmjopen-2022-066925.R2                                                                                                                                                                                                                                                                                                                                                                                                                                                                                                                                                                                                                                                                                                                                                                                                                     |
| Article Type:                   | Original research                                                                                                                                                                                                                                                                                                                                                                                                                                                                                                                                                                                                                                                                                                                                                                                                                          |
| Date Submitted by the Author:   | 08-Feb-2023                                                                                                                                                                                                                                                                                                                                                                                                                                                                                                                                                                                                                                                                                                                                                                                                                                |
| Complete List of Authors:       | Ngan, Tran; Queen's University Belfast, Centre for Public Health<br>Ramanathan, Kogila; Monash University Malaysia, Global Public Health, Jeffrey Cheah School of Medicine and Health Sciences; Monash University Malaysia, South East Asia Community Observatory<br>Saleh, Muhamad; Monash University Malaysia, South East Asia Community Observatory<br>Schliemann, Desiree ; Queen's University Belfast, Centre for Public Health<br>Ibrahim Tamin, Nor Saleha ; Ministry of Health Malaysia<br>Su, Tin ; Monash University Malaysia, Global Public Health, Jeffrey Cheah School of Medicine and Health Sciences; Monash University Malaysia, South East Asia Community Observatory<br>Donnelly, Michael; Queen's University Belfast, Centre for Public Health<br>O'Neill, Ciaran; Queen's University Belfast, Centre for Public Health |
| <b>Primary Subject Heading</b>: | Health economics                                                                                                                                                                                                                                                                                                                                                                                                                                                                                                                                                                                                                                                                                                                                                                                                                           |
| Secondary Subject Heading:      | Global health, Public health, Oncology                                                                                                                                                                                                                                                                                                                                                                                                                                                                                                                                                                                                                                                                                                                                                                                                     |
| Keywords:                       | Health policy < HEALTH SERVICES ADMINISTRATION & MANAGEMENT, ONCOLOGY, HEALTH ECONOMICS, PUBLIC HEALTH                                                                                                                                                                                                                                                                                                                                                                                                                                                                                                                                                                                                                                                                                                                                     |
|                                 |                                                                                                                                                                                                                                                                                                                                                                                                                                                                                                                                                                                                                                                                                                                                                                                                                                            |

SCHOLARONE™  
Manuscripts



I, the Submitting Author has the right to grant and does grant on behalf of all authors of the Work (as defined in the below author licence), an exclusive licence and/or a non-exclusive licence for contributions from authors who are: i) UK Crown employees; ii) where BMJ has agreed a CC-BY licence shall apply, and/or iii) in accordance with the terms applicable for US Federal Government officers or employees acting as part of their official duties; on a worldwide, perpetual, irrevocable, royalty-free basis to BMJ Publishing Group Ltd ("BMJ") its licensees and where the relevant Journal is co-owned by BMJ to the co-owners of the Journal, to publish the Work in this journal and any other BMJ products and to exploit all rights, as set out in our [licence](#).

The Submitting Author accepts and understands that any supply made under these terms is made by BMJ to the Submitting Author unless you are acting as an employee on behalf of your employer or a postgraduate student of an affiliated institution which is paying any applicable article publishing charge ("APC") for Open Access articles. Where the Submitting Author wishes to make the Work available on an Open Access basis (and intends to pay the relevant APC), the terms of reuse of such Open Access shall be governed by a Creative Commons licence – details of these licences and which [Creative Commons](#) licence will apply to this Work are set out in our licence referred to above.

Other than as permitted in any relevant BMJ Author's Self Archiving Policies, I confirm this Work has not been accepted for publication elsewhere, is not being considered for publication elsewhere and does not duplicate material already published. I confirm all authors consent to publication of this Work and authorise the granting of this licence.

1  
2  
3 **A budget impact analysis of a home-based colorectal cancer screening**  
4 **programme in Malaysia**  
5  
6  
7

8  
9 Tran Thu Ngan<sup>1\*</sup>, Kogila Ramanathan<sup>2,3</sup>, Muhamad Raziq Bin Mohd Saleh<sup>3</sup>, Désirée  
10 Schliemann<sup>1</sup>, Nor Saleha Binti Ibrahim Tamin<sup>4</sup>, Tin Tin Su<sup>2,3</sup>, Michael Donnelly<sup>1</sup>, Ciaran  
11 O'Neill<sup>1</sup>  
12  
13

14  
15  
16 <sup>1</sup> *Centre for Public Health, Queen's University Belfast, Belfast, UK*

17  
18 <sup>2</sup> *Global Public Health, Jeffrey Cheah School of Medicine and Health Sciences, Monash*  
19 *University Malaysia, Selangor, Malaysia*  
20

21  
22 <sup>3</sup> *South East Asia Community Observatory (SEACO), Jeffrey Cheah School of Medicine and*  
23 *Health Sciences, Monash University Malaysia*  
24

25  
26 <sup>4</sup> *Ministry of Health Malaysia, Putrajaya, Malaysia*  
27  
28

29  
30  
31  
32 \* Correspondence to:

33  
34 Tran Thu Ngan, PhD

35  
36 Postal address: Centre for Public Health, Queen's University Belfast, Belfast, United Kingdom

37  
38 Email: [n.t.tran@qub.ac.uk](mailto:n.t.tran@qub.ac.uk)  
39  
40  
41  
42

43  
44 ORCID of the authors

45  
46 Tran Thu Ngan : 0000-0003-2771-9878

47  
48 Désirée Schliemann : 0000-0002-8746-3002

49  
50 Ciaran O'Neill : 0000-0001-7668-3934  
51  
52  
53  
54  
55  
56  
57  
58  
59  
60

# 1 A budget impact analysis of a home-based colorectal cancer screening 2 programme in Malaysia

## 3 Abstract

4 **Objectives:** The 2020-2022 research project ‘Colorectal Cancer Screening Intervention for  
5 Malaysia’ (CRC-SIM) evaluated the implementation of a home-based CRC screening pilot in  
6 Segamat District. This budget impact analysis (BIA) assessed the expected changes in health  
7 expenditure of the Malaysian Ministry of Health budget in the scenario where the pilot  
8 programme was implemented nationwide versus current opportunistic screening.

9 **Design:** Budget impact analysis. Assumptions and costs in the opportunistic and novel CRC  
10 screening scenarios were derived from a previous evaluation of opportunistic CRC screening in  
11 community health clinics across Malaysia and the CRC-SIM research project, respectively.

12 **Setting:** National level (with supplement analysis for district level). The BIA was conducted  
13 from the viewpoint of the federal government and estimated the annual financial impact over  
14 a period of five years.

15 **Results:** The total annual cost of the current practice of opportunistic screening was RM1,584,321  
16 (~I\$1,099,460; RM=Ringgit Malaysia; I\$=International dollar) of which 80% (RM1,274,690 or  
17 ~I\$884,587) was expended on the provision of opportunistic CRC to adults who availed of the  
18 service. Regarding the implementation of national CRC screening programme, the net budget  
19 impact in the 1<sup>st</sup> year was estimated to be RM107,631,959 (~I\$74,692,546) and to reach  
20 RM148,485,812 (~I\$103,043,589) in the 5<sup>th</sup> year based on an assumed increased uptake of 5%  
21 annually. The costs were calculated to be sensitive to the probability of adults who were  
22 contactable, eligible, and agreeable to participating in the programme.

23 **Conclusions:** Results from the BIA provided direct and explicit estimates of the budget  
24 changes to when implementing a population-based national CRC screening programme to aid  
25 decision making by health services planners and commissioners in Malaysia about whether  
26 such programme is affordable within given their budget constraint. The study also illustrates  
27 the use and value of the BIA approach in LMICs and resource-constrained settings.

28 **Keywords:** Colorectal cancer screening, budget impact analysis, home-based testing, global  
29 health, Malaysia

### Strengths and limitations of this study

- The budget impact analysis (BIA) was used to evaluate the ‘affordability’ of colorectal cancer (CRC) screening programme in Malaysia within given budget constraint.
- Assumptions and cost inputs for modelling the budget impact were based on the actual costs and rates observed in Malaysia.
- The total cost of resources (=unit costs \* number of users) for opportunistic screening and the CRC screening programme were compared to calculate the net budget impact.
- The BIA was conducted from the viewpoint of the federal government and only included costs and resource requirements relevant to this particular budget holder.
- The BIA could not and was not intended to provide answers to questions about whether or not the screening programme is good value for money (which can be answered by a cost-effectiveness analysis).

## INTRODUCTION

Colorectal cancer (CRC) has the second highest incidence and mortality rate among all types of cancer in both sexes in Malaysia [1]. The age standardised incidence rate in 2012-2016 was 14.8 per 100,000 males and 11.1 per 100,000 females which appears to be stable compared to 2007-2011 [2]. In contrast, the proportion of CRC patients who are diagnosed at a late stage (i.e., stage III or IV) is increasing. Report from Ministry of Health Malaysia (MoHM) showed that the proportion of males with late stage CRC increased from 65.9% during 2007-2011 to 72.4% during 2012-2016; and from 65.2% to 73.1% for females [2]. The report did not give an explanation about this increasing trend though [2]. Late stage diagnosis negatively impacts survival rate; for example, the 5-year survival rates for cases diagnosed at stage I, II, III, and IV in 2002-2004 in Kuala Lumpur were 78.6%, 52.9%, 44.3%, and 9.3%, respectively [3]. Improved survival can be achieved by early detection through screening and the removal of premalignant polyps [4]. However, Malaysia currently does not have a population-based national CRC screening programme.

1  
2  
3 46 The Ministry of Health of Malaysia (MoHM) adopted the use of immunochemical faecal occult  
4  
5 47 blood test (iFOBT) for opportunistic CRC screening at public health clinics since 2014 [5].  
6  
7 48 MoHM guidelines recommend screening for asymptomatic individuals aged 50-75 years old  
8  
9 49 with average risk of CRC [6]. The uptake (number of patients screened/total eligible  
10  
11 50 population) of this opportunistic screening tends to be very low. The annual average uptake  
12  
13 51 during 2014-2018 was 0.5% while the 5-year cumulative uptake was 2.29% due to low  
14  
15 52 awareness about CRC in general and CRC tests in particular, fear of the result, concern about  
16  
17 53 the cost, and absence of a doctor's recommendation [5, 7]. Home-based iFOBT has been  
18  
19 54 implemented in many high-income countries (HICs) to improve the accessibility and uptake of  
20  
21 55 CRC screening [8]. In this context, the Southeast Asia Community Observatory (SEACO) at  
22  
23 56 Monash University Malaysia and Queen's University Belfast (Northern Ireland) collaborated  
24  
25 57 to conduct the research project, 'Colorectal Cancer Screening Intervention for Malaysia'  
26  
27 58 (CRC-SIM) in 2020-2022. This project evaluated the implementation of a home-based CRC  
28  
29 59 screening pilot in Segamat District. The uptake of the novel screening programme was 22%.  
30  
31 60 The significantly higher uptake indicates the potential population wide impact if this screening  
32  
33 61 approach (i.e., using home-based iFOBT and self-reporting test results) was scaled up.  
34  
35 62 However, in order to aid public health decision making, there is a need to model a scaled-up  
36  
37 63 version of the research-tested screening programme and, more specifically, gather insights  
38  
39 64 about the total costs of programme implementation and how it might impact the MoHM budget.  
40  
41 65 In other words, there is a need for a budget impact analysis (BIA).  
42  
43 66  
44  
45  
46  
47  
48  
49  
50  
51 67 Budget impact analysis was first introduced in 1998 by Mauskopf [9, 10]. Since then, BIA is  
52  
53 68 gradually requested as a part of the health technology assessment (HTA) procedure by a few  
54  
55 69 countries around the world such as Australia, Canada, the United States (the US), England,  
56  
57 70 Ireland, Spain, Belgium, Poland, Israel, and Thailand [11]. Regarding BIA for colorectal cancer  
58  
59  
60

1  
2  
3 71 (CRC) screening, a recent systematic review found six studies conducted in the UK, US,  
4  
5 72 Belgium, and Australia [12]. We found two additional studies published in 2018 and 2019 from  
6  
7 73 Spain and Thailand, respectively [13, 14]. Although results from these studies are not  
8  
9 74 comparable as they were specific to each studied country, all studies were conducted to answer  
10  
11 75 the question ‘What is the budget impact of implementing a colorectal cancer  
12  
13 76 screening/prevention programme compared with current usual care’. It is also the research  
14  
15 77 question that the BIA in this study aims to answer. Specifically, the BIA assessed the expected  
16  
17 78 changes in the health expenditure of MoHM budget as a result of implementing a population-  
18  
19 79 based national CRC screening programme versus current opportunistic screening (or ‘usual  
20  
21 80 care’). It assessed the affordability of the screening programme given potential budget  
22  
23 81 constraints.  
24  
25  
26  
27  
28  
29  
30  
31

## 32 **METHODS**

33  
34 84 The conduct of this BIA and presentation of this paper followed the guidelines developed by  
35  
36 85 the International Society for Pharmacoeconomics and Outcomes Research (ISPOR) Task Force  
37  
38 86 [11, 15]. All costs are presented in local currency -the Malaysian Ringgit (RM)- and  
39  
40 87 International Dollar (I\$). RM was converted to I\$ using purchasing power parity (PPP)  
41  
42 88 conversion factors instead of market exchange rates. The PPP conversion rate of 1.441 was  
43  
44 89 obtained from the IMF World Economic Outlook Database [16].  
45  
46  
47  
48  
49  
50

### 51 **Health service under assessment and its comparator**

52  
53 92 The specific health service that was the focus of the BIA was a population-based screening  
54  
55 93 programme for colorectal cancer using a self-rapid response iFOBT. The comparator was  
56  
57 94 current or ‘usual care’ - opportunistic screening.  
58  
59  
60

1  
2  
3 96 The BIA is predicated on the opportunistic screening programme being replaced by the new  
4  
5 97 population-based screening programme (i.e., the two programmes would not be run in  
6  
7 98 conjunction or in other words, the two scenarios in assessment are mutually exclusive). In each  
9  
10 99 scenario, the patient pathway from the point when patients were invited for screening to receipt  
11  
12 100 of a definitive diagnosis were identified and described. The screening procedure ends at the point  
13  
14 101 of a patient receiving their iFOBT result with encouragement to attend hospital for a colonoscopy  
15  
16 102 (if iFOBT is positive). It is important to note that the BIA included costs of screening and  
17  
18 103 diagnosis (e.g., colonoscopy, biopsy) but not treatment. The BIA also did not address issues with  
19  
20 104 respect to equity of access and uptake of services in either screening scenarios.  
21  
22  
23  
24  
25

26 106 The patient pathways for the 'usual care' practice and the novel CRC screening programme are  
27  
28 107 presented in Figure 1 and 2, respectively. In opportunistic screening practice, it is recommended  
29  
30 108 or expected that individuals who are aged 50-75 years will be screened for CRC symptoms  
31  
32 109 when they attend their local health clinic (for any health condition or problem). If they are  
33  
34 110 asymptomatic and have an average risk of having CRC (based on family history), they are  
35  
36 111 offered an iFOBT, followed by a colonoscopy if the iFOBT test was positive. If CRC is  
37  
38 112 detected following a colonoscopy, the result is conveyed to a patient along with an explanation  
39  
40 113 of the treatment plan or referral arrangement.  
41  
42  
43

44 114 (Figure 1 is about here)

46 115 Details of the home-based screening intervention in CRC-SIM were published elsewhere [17].  
47  
48 116 Briefly, in the novel CRC screening programme, individuals aged 50-75 years were contacted,  
49  
50 117 checked for eligibility, and invited to participate. A home-screening 'pack' was posted to eligible  
51  
52 118 participants followed by two reminders. The test was performed at home by participants who took  
53  
54 119 a photograph of the completed test and texted it to trained medical professionals who interpreted  
55  
56 120 the photograph. Participants with positive iFOBT were referred for a colonoscopy at hospital.  
57  
58  
59  
60



1  
2  
3 121 (Figure 2 is about here)  
4

5 122 There were two main differences between these patient pathways. Firstly, individuals within  
6  
7 123 the target age group for screening were contacted directly and invited to participate in the novel  
8  
9 124 CRC screening programme while in the situation of 'usual care', CRC screening was offered  
10  
11 125 (if screening guideline recommendations were followed) only when members of the target  
12  
13 126 group visited their clinic for some other health condition or problem. Secondly, the iFOBT was  
14  
15 127 performed by doctors at health clinics in the 'usual care' pathway while in the novel CRC  
16  
17 128 screening programme, participants self-tested in their home. Home-based testing generated  
18  
19 129 additional stages in the pathways in relation to sending a test, reminding participants, taking a  
20  
21 130 photo of a completed test, and sending it to programme officers and vice versa. The remaining  
22  
23 131 stages of each pathway (e.g., being screened for eligibility, receiving a colonoscopy, and  
24  
25 132 receiving a treatment plan) were the same across the two scenarios.  
26  
27  
28  
29  
30

31 133

### 32 33 134 **Eligible population and input assumptions**

34  
35 135 The target population for current opportunistic screening in Malaysia is individuals aged 50-  
36  
37 136 75 years, regardless of sex. Due to the nature of home-based screening, the target population  
38  
39 137 for the CRC screening programme was required to meet some additional inclusion criteria as  
40  
41 138 presented in Figure 2. The number of individuals who presented and completed each stage was  
42  
43 139 estimated using input assumptions.  
44  
45  
46

47 140

48  
49 141 Data about the population of Malaysia by age was taken from government reports (i.e.,  
50  
51 142 Department of Statistics, Malaysia) and from World Population Review [18, 19]. The total  
52  
53 143 population was reported to be 32,676,786 in 2021, of which, 19% or 6,228,195 were aged 50-  
54  
55 144 75 years old [18, 19].  
56  
57

58 145  
59  
60

1  
2  
3 146 **In the ‘usual care’ – opportunistic screening pathway or scenario**, all assumptions were  
4  
5 147 derived from a study by Tamin NSI (2020) which was a 5-year evaluation of opportunistic CRC  
6  
7 148 screening (and the use of stool-based tests) in community health clinics across Malaysia [5]. It  
8  
9 149 was assumed that 0.482% of the eligible population would avail of CRC screening when they  
10  
11 150 attended local health clinics for other conditions; and 9.21% of this proportion of tested patients  
12  
13 151 would receive a positive result. Only 55.9% of patients in the study by Tamin availed of a  
14  
15 152 colonoscopy after a positive iFOBT. CRC detection after colonoscopy investigation was 4.04%.  
16  
17  
18  
19 153

20  
21 154 **In the novel CRC screening programme**, all assumptions were derived from the CRC-SIM  
22  
23 155 research project. It was assumed that 50.51% of the eligible population would be contactable  
24  
25 156 and meet all inclusion criteria to participate in the home-based screening programme; 52.27%  
26  
27 157 of people who were eligible would agree to participate; 41.63% would perform the iFOBT and  
28  
29 158 send a photo of a completed test to the programme officers; 18.01% of people who would be  
30  
31 159 tested would receive a positive result; 41.07% would avail of colonoscopy after a positive  
32  
33 160 iFOBT result; and CRC detection after colonoscopy investigation would be 4.35%.  
34  
35  
36  
37  
38 161

39  
40 162 Table 1 summarises details about the input assumptions that were used to estimate the number  
41  
42 163 of individuals at each stage of the respective pathway: the opportunistic screening pathway and  
43  
44 164 the CRC screening programme pathway.  
45  
46  
47  
48  
49  
50  
51  
52  
53  
54  
55  
56  
57  
58  
59  
60

168 **Table 1: Input assumptions used to estimate the population at each stage of the patient**  
 169 **pathways**

| Stage in pathway                                                                                           | Opportunistic screening scenario<br>(Current practice) |                    | Population-based CRC programme screening scenario<br>(Proposed practice) |                    |
|------------------------------------------------------------------------------------------------------------|--------------------------------------------------------|--------------------|--------------------------------------------------------------------------|--------------------|
|                                                                                                            | Assumption*                                            | No. of individuals | Assumption**                                                             | No. of individuals |
| Total population (all ages)                                                                                | NA                                                     | 32,676,786         | NA                                                                       | 32,676,786         |
| Target population (aged 50-75)                                                                             | 19.06%                                                 | 6,228,195          | 19.06%                                                                   | 6,228,195          |
| Eligible population (met all inclusion criteria)                                                           | 100%                                                   | 6,228,195          | 50.51%                                                                   | 3,146,020          |
| Availed of/agreed to take CRC screening                                                                    | 0.482%                                                 | 30,020             | 52.27%                                                                   | 1,644,561          |
| Needed 1 <sup>st</sup> reminder to return the iFOBT result (among those agreed to participate)             | NA                                                     | NA                 | 78.71%                                                                   | 1,294,514          |
| Needed 2 <sup>nd</sup> reminder to return the iFOBT result (among those received 1 <sup>st</sup> reminder) | NA                                                     | NA                 | 88.10%                                                                   | 1,140,405          |
| Returned iFOBT result (among those agreed to participate)                                                  | 100%                                                   | 30,020             | 41.63%                                                                   | 684,683            |
| Received iFOBT positive result                                                                             | 9.21%                                                  | 2,765              | 18.01%                                                                   | 123,287            |
| Availed of colonoscopy after positive iFOBT                                                                | 55.9%                                                  | 1,546              | 41.07%                                                                   | 50,636             |
| CRC detection after colonoscopy investigation                                                              | 4.04%                                                  | 62                 | 4.35%                                                                    | 2,202              |

CRC: Colorectal cancer; iFOBT: Immunochemical faecal occult blood test; NA: Not applicable; No: Number  
 \* The assumptions were derived from a study of Tamin NSI (2020) which was a 5-year evaluation of using stool-based test for opportunistic CRC screening in primary health institutions across Malaysia [5].

\*\* The assumptions were derived from the Colorectal Cancer Screening Intervention for Malaysia (or CRC-SIM research project) in Segamat District, conducted by Queen's University Belfast, Monash University, and Southeast Asia Community Observatory (SEACO) in 2021.

170

171

1  
2  
3 172 **Cost input and data sources**  
4

5 173 In the opportunistic screening scenario, the total cost comprised the cost of:  
6

7 174 (i) performing screening (e.g., asking for symptoms, family history, and collecting the sample)  
8

9 175 (ii) processing stool specimens  
10

11 176 (iii) interpreting test results and  
12

13 177 (iv) conveying a definitive diagnosis to patients (include explaining treatment plan or referral  
14

15 178 arrangements)  
16

17 179  
18

19 180 In the CRC programme screening scenario, the total cost comprised the costs of:  
20

21 181 (i) contacting potential participants  
22

23 182 (ii) delivering iFOBT test kits (including cost of the test, postage, print materials, and sending  
24

25 183 video instruction)  
26

27 184 (iii) sending a reminder to participants (up to 2 times, by text message and phone call)  
28

29 185 (iv) interpreting and conveying results to participants and  
30

31 186 (v) following-up patients with positive iFOBT but did not take colonoscopy in order to  
32

33 187 encourage them to avail of the colonoscopy  
34

35 188  
36

37 189 These costs were calculated by multiplying the time allocated for the completion of each task  
38

39 190 with the salary cost of the person who undertakes each task plus cost of consumables. Table 2  
40

41 191 shows the unit cost for each cost element, related assumptions, and data sources.  
42

43 192  
44

45 193  
46  
47  
48  
49  
50  
51  
52  
53  
54  
55  
56  
57  
58  
59  
60

194 **Table 2: Resources and unit costs**

Currency: Malaysian ringgit (RM)

| Cost element                                                                                         | Unit cost<br>(Per screen)<br>RM (I\$) | Assumptions                                                 | Source |
|------------------------------------------------------------------------------------------------------|---------------------------------------|-------------------------------------------------------------|--------|
| <b><i>Current practice (opportunistic screening)</i></b>                                             |                                       |                                                             |        |
| Performing screening (asking for symptoms, family history, referral) and taking sample               | 5.58                                  | 20 min x salary RM2947/month                                | 1      |
| Processing stool specimens                                                                           | 1.70                                  | 10 min x salary RM1797/month                                | 2      |
| Interpreting the test results                                                                        | 2.79                                  | 10 min x salary RM2947/month                                | 1      |
| Conveying a definitive diagnosis to patients (along with explaining treatment plan or referral etc.) | 8.37                                  | 30 min x salary RM2947/month                                | 1      |
| <b><i>Proposed practice (Population-based CRC screening programme)</i></b>                           |                                       |                                                             |        |
| Contact eligible individuals - agreed to participate                                                 | 0.98                                  | 7.1 min x (salary RM1440/month + mobile package RM20/month) | 3      |
| Contact eligible individuals - rejected/excluded to participate                                      | 0.47                                  | 3.4 min x (same as above)                                   | 3      |
| iFOBT rapid test kit                                                                                 | 6.90                                  |                                                             | 3      |
| Print materials (instruction leaflet, explanatory statement)                                         | 1.10                                  | 90 cents for colour print + 20 cent for black & white print | 3      |
| Postage (stamps, etc.)                                                                               | 5.35                                  |                                                             | 3      |
| Sending video through WhatsApp                                                                       | 0.41                                  | 3 min x (salary RM1440/month + mobile package RM20/month)   | 3      |
| Sending reminder text message                                                                        | 0.41                                  | 3 min x (same as above)                                     | 3      |
| Reminder call                                                                                        | 0.28                                  | 2 min x (same as above)                                     | 3      |
| Interpreting the test kit result                                                                     | 1.70                                  | 10 min x salary RM1797/month                                | 3      |
| Sending text message to inform patient of negative result                                            | 0.45                                  | 2 min x (salary RM2350/month + mobile package RM20/month)   | 3      |
| Calling patient to inform him/her of positive result                                                 | 0.67                                  | 3 min x (same as above)                                     | 3      |
| Preparing and sending referral letter to patient/clinic                                              | 1.12                                  | 5 min x (same as above)                                     | 3      |
| Follow up effort                                                                                     | 6.73                                  | 30 min x (same as above)                                    | 3      |
| Developing communication materials, <b>one-off cost</b>                                              | 6,063                                 | Communication materials do not change in 5 years            | 3      |

Currency: Malaysian ringgit (RM)

| Cost element                                                                                                                                                                                                               | Unit cost<br>(Per screen)<br>RM (I\$) | Assumptions                                                                                                                                                                                                                                            | Source |
|----------------------------------------------------------------------------------------------------------------------------------------------------------------------------------------------------------------------------|---------------------------------------|--------------------------------------------------------------------------------------------------------------------------------------------------------------------------------------------------------------------------------------------------------|--------|
| Training for data collectors*, <b>one-off cost</b><br>* Data collectors are those employed by the programme to (i) contact potential participants, (ii) deliver iFOBT test kits, and (iii) send a reminder to participants | 109,703                               | + 1 day training (virtual using Zoom)<br>+ 1 trainer for maximum 25 trainees<br>+ 1 data collector* is needed for every target population of 400<br>+ Cost=1-day-salary of trainer/trainees x number of trainer/trainees<br>+ No retraining in 5 years | 3      |
| <b>Same in both scenarios/practices</b>                                                                                                                                                                                    |                                       |                                                                                                                                                                                                                                                        |        |
| Colonoscopy (including polyps removal and/or biopsy if needed)                                                                                                                                                             | 200                                   |                                                                                                                                                                                                                                                        |        |
| Consumables – stool container, gloves, mask, plastic waste bag and disposal of materials from the test                                                                                                                     | 10.80                                 | RM8636.7/800 sets                                                                                                                                                                                                                                      | 3      |

iFOBT: Immunochemical faecal occult blood test; RM: Malaysian ringgit

Source:

1. Public Services Commission of Malaysia. Medical Officer Grade UD41. Accessed at <https://www.spa.gov.my/spa/laman-utama/gaji-syarat-lantikan-deskripsi-tugas/ijazah-sarjana-phd/pegawai-perubatan-gred-ud41>
2. Public Services Commission of Malaysia. Medical laboratory technologist Grade U29. Accessed at [https://www.interactive.jpa.gov.my/ezskim/klasifikasi/perbikalanskim.asp?id\\_skim=3LU03](https://www.interactive.jpa.gov.my/ezskim/klasifikasi/perbikalanskim.asp?id_skim=3LU03)
3. Colorectal Cancer Screening Intervention for Malaysia (or CRC-SIM research project) in Segamat District, conducted by Queen's University Belfast, Monash University, and Southeast Asia Community Observatory (SEACO) in 2021

195

196 In the current practice of opportunistic screening, doctors were consulted about the estimated

197 time to perform each stage in the pathway. The monthly salary of a general doctor and a medical

198 laboratory technologist was based on the rate published by the Public Services Commission of

199 Malaysia [20, 21]. These rates were RM2,947 (~I\$2,045) and RM1,797 (~I\$1,247), respectively.

200 In the novel CRC screening programme, the time to perform each stage in the pathway, salary

201 of personnel, and costs of material resources (e.g., rapid kit test, consumables, postage, printing

202 materials) were based on the time and expenditure observed in the CRC-SIM research project.

203 All costs were calculated per screen except the cost of training and the cost of developing

204 communication materials which were one-off costs based on the assumption that

205 communication materials would not change, and no re-training would be needed within 5 years.

1  
2  
3 206 It was assumed (based on the experience of operating the screening programme during the  
4  
5 207 CRC-SIM project) that one data collector (i.e., those employed by the programme to (i) contact  
6  
7 208 potential participants, (ii) deliver iFOBT test kits, and (iii) send a reminder to participants)  
8  
9 209 would be needed for every 400 people in the target population. Training would last one day  
10  
11 210 and would be delivered virtually; thus, the cost of training equalled (1-day-salary of trainer x  
12  
13 211 number of trainer) + (1-day-salary of trainees x number of trainees/data collectors).  
14  
15  
16  
17  
18

### 19 213 **Perspective and time horizon**

20  
21 214 The BIA was conducted from the viewpoint of the federal government which finances  
22  
23 215 Malaysia's public health system [22]. Only those costs and resource requirements relevant to  
24  
25 216 the budget holder were included in the analysis. For example, the out-of-pocket expenditure  
26  
27 217 incurred by patients were excluded.  
28  
29  
30  
31  
32

33 219 The analysis estimated the annual financial impact over a period of five years as recommended  
34  
35 220 in the guidelines [11, 23]. Costs were not discounted given that the BIA methodology reports  
36  
37 221 the costs for each year in which they occur rather than a net present value [11].  
38  
39  
40  
41

### 42 223 **Budget impact analyses**

#### 43 44 224 *Computing framework and base-case analysis*

45  
46 225 The BIA used a cost calculator programmed in Microsoft Excel, following the costing  
47  
48 226 template<sup>1</sup> produced by the National Institute for Health and Care Excellence in the UK (NICE).  
49  
50 227 The template was modified to fit the programme under assessment. The cost calculator  
51  
52  
53  
54  
55  
56  
57

---

58  
59  
60  
<sup>1</sup> The template can be freely downloaded at <https://www.nice.org.uk/Media/Default/About/what-we-do/our-programmes/evidence-standards-framework/budget-impact-template.xlsx>

228 approach is recommended by guidelines as it is easy for stakeholders to understand and  
229 replicate the results [11].

230

231 First, the number of individuals who completed each stage was estimated (Table 1). The  
232 resources that were used at each stage of the respective pathways (in opportunistic screening  
233 and the novel CRC screening programme) were listed along with their unit costs (i.e., cost of  
234 each resource per person) (Table 2). Unit costs were multiplied by number of users to give the  
235 total cost of resources for each scenario. The net budget impact was calculated as the difference  
236 in cost between opportunistic screening and the CRC screening programme. Visual depiction  
237 of the cost calculator is shown in Supplementary Material, Figure S1.

238

### 239 *Uncertainty and scenario analyses*

240 The input assumptions (that were used to estimate the number of individuals at each stage of  
241 the respective pathway) and the cost inputs were varied, and then the impact of these changes  
242 in relation to the results was analysed to investigate the sensitivity of the budget impact results  
243 to variations in individual input. As recommended by Gray et al. (2011), the range of variation  
244 regarding parameters for which data sources about dispersion were unavailable were  $\pm 20\%$  of  
245 the base case [24].

246

### 247 **Patient and public involvement**

248 It was not appropriate or possible to involve patients or the public in the design, or conduct, or  
249 reporting, or dissemination plans of our research as this type of study is a secondary analysis  
250 of data from a payer perspective (Ministry of Health Malaysia).

251



1  
2  
3 252 **RESULTS**  
4  
5

6 253 **Base-case analysis**  
7

8 254 The total annual cost of the current practice of opportunistic screening is RM1,584,321  
9  
10 255 (~I\$1,099,460), of which 80% (RM1,274,690 ~ I\$884,587) was for providing opportunistic  
11  
12 256 CRC to adults who availed of the service. Costs of providing colonoscopy (including polyps  
13  
14 257 removal and/or biopsy if needed) after receipt of a positive iFOBT and conveying definitive  
15  
16 258 diagnosis to patients (along with explaining treatment plan or referral etc.) after the outcome  
17  
18 259 of the colonoscopy were RM309,108 (~I\$214,509) and RM523 (~I\$363), respectively.  
19  
20  
21  
22  
23

24 261 The total annual cost over a 5-year period of the proposed practice (i.e., CRC screening  
25  
26 262 programme) is shown in Table 3. It was assumed that the number of people who would agree  
27  
28 263 to participate in the programme would increase by 5% each year (in consideration of health  
29  
30 264 promotion activities as well as information flows including word of mouth between  
31  
32 265 participants). Therefore, the financial impact would also increase accordingly.  
33  
34  
35  
36  
37  
38  
39  
40  
41  
42  
43  
44  
45  
46  
47  
48  
49  
50  
51  
52  
53  
54  
55  
56  
57  
58  
59  
60

268 **Table 3: Annual cost of proposed practice (i.e., CRC screening programme)**

*Currency: Malaysian ringgit (RM) and International Dollar (I\$)*

| <b>Proposed practice</b>                                                                                                      | <b>Year 1</b><br>RM (I\$)          | <b>Year 2</b><br>RM (I\$)          | <b>Year 3</b><br>RM (I\$)          | <b>Year 4</b><br>RM (I\$)          | <b>Year 5</b><br>RM (I\$)           |
|-------------------------------------------------------------------------------------------------------------------------------|------------------------------------|------------------------------------|------------------------------------|------------------------------------|-------------------------------------|
| Contacting adults who are eligible for CRC screening programme (i.e., aged 50-75) and screen for eligibility of participating | 2,320,148<br>(1,610,096)           | 2,320,148<br>(1,610,096)           | 2,320,148<br>(1,610,096)           | 2,320,148<br>(1,610,096)           | 2,320,148<br>(1,610,096)            |
| Providing iFOBT test to adults who agreed to participate in CRC screening programme after being invited                       | 93,654,886<br>(64,992,981)         | 102,612,907<br>(71,209,512)        | 111,570,928<br>(77,426,043)        | 120,528,949<br>(83,642,574)        | 129,486,970<br>(89,859,105)         |
| Providing 1 <sup>st</sup> reminder to participants                                                                            | 536,929<br>(372,609)               | 588,286<br>(408,248)               | 639,643<br>(443,888)               | 690,999<br>(479,527)               | 742,356<br>(515,167)                |
| Providing 2 <sup>nd</sup> reminder to participants                                                                            | 315,339<br>(218,833)               | 345,501<br>(239,765)               | 375,663<br>(260,696)               | 405,825<br>(281,627)               | 435,987<br>(302,559)                |
| Interpreting returned iFOBT samples                                                                                           | 1,165,129<br>(808,556)             | 1,276,572<br>(885,893)             | 1,388,016<br>(963,231)             | 1,499,460<br>(1,040,569)           | 1,610,903<br>(1,117,906)            |
| Conveying result through message to participants with iFOBT negative result                                                   | 251,990<br>(174,872)               | 276,093<br>(191,598)               | 300,196<br>(208,324)               | 324,298<br>(225,050)               | 348,401<br>(241,777)                |
| Preparing and sending referral letter and calling participants with iFOBT POSITIVE result                                     | 221,356<br>(153,613)               | 242,529<br>(168,306)               | 263,701<br>(182,999)               | 284,874<br>(197,692)               | 306,046<br>(212,384)                |
| Following up participants who DID NOT take colonoscopy after positive iFOBT                                                   | 489,158<br>(339,457)               | 535,945<br>(371,926)               | 582,733<br>(404,394)               | 629,520<br>(436,863)               | 676,308<br>(469,332)                |
| Providing colonoscopy (including polyps removal and/or biopsy if needed) to participants with positive iFOBT                  | 10,127,147<br>(7,027,861)          | 11,095,801<br>(7,700,070)          | 12,064,455<br>(8,372,280)          | 13,033,109<br>(9,044,489)          | 14,001,764<br>(9,716,700)           |
| Conveying definitive diagnosis to patients (along with explaining treatment plan or referral etc.) after the colonoscopy      | 18,432<br>(12,791)                 | 20,195<br>(14,015)                 | 21,958<br>(15,238)                 | 23,721<br>(16,461)                 | 25,484<br>(17,685)                  |
| Capital costs (Developing communication materials + Training for data collectors)                                             | 115,766<br>(80,337)                | 115,766<br>(80,337)                | 115,766<br>(80,337)                | 115,766<br>(80,337)                | 115,766<br>(80,337)                 |
| <b>Total cost of proposed practice</b>                                                                                        | <b>109,216,279</b><br>(75,792,005) | <b>119,429,743</b><br>(82,879,766) | <b>129,643,206</b><br>(89,967,527) | <b>139,856,670</b><br>(97,055,288) | <b>150,070,133</b><br>(104,143,049) |

*CRC: Colorectal cancer; iFOBT: Immunochemical faecal occult blood test*

1  
2  
3 270 Similar to opportunistic screening, the cost to provide iFOBT to the eligible population who availed  
4  
5 271 of the service accounted for 86% of the total cost of the proposed CRC screening programme. The  
6  
7 272 second most costly component was the provision of colonoscopy (including polyps removal and/or  
8  
9 273 biopsy if needed) to patients with an iFOBT positive result, at 9% of the total cost. The remaining  
10  
11 274 nine cost components such as contacting potential participants, reminding participants to send  
12  
13 275 photograph of iFOBT result, conveying diagnosis to participants and the follow-up effort added  
14  
15 276 only up to 5% of the total cost.  
16  
17  
18

19 277

20  
21 278 The net budget impact in the 1<sup>st</sup> year of implementing CRC screening programme would be  
22  
23 279 RM107,631,959 (~I\$74,692,546 which equalled the total cost of future practice minus the total  
24  
25 280 cost of current practice). The impact increases each year as the number of people who agree to  
26  
27 281 participate in the programme increase, reaching RM117,845,422 (~I\$81,780,307) in year 2,  
28  
29 282 RM128,058,885 (~I\$88,868,067) in year 3, RM138,272,349 (~I\$ 95,955,829) in year 4, and  
30  
31 283 RM148,485,812 (~I\$103,043,589) in year 5.  
32  
33  
34

35 284

36  
37 285 The net budget impact of providing and delivering the CRC screening programme over the 5-year  
38  
39 286 timeframe for each state in Malaysia (calculated according to the population size of each state) can  
40  
41 287 be accessed in Supplementary Material, Table S1. These estimates aid service planning decisions  
42  
43 288 if the novel pilot programme is implemented in one or more of these states before being scaled up  
44  
45 289 into nationwide programme.  
46  
47  
48

49 290

### 50 51 291 **Uncertainty and scenario analyses**

52  
53 292 The tornado diagram in Figure 3 shows the change to net budget impact when assumptions and  
54  
55 293 cost inputs were varied. It presents the results of multiple univariate sensitive analyses on key  
56  
57 294 inputs that exert the most influence on the net budget impact (See Table S2, Supplementary  
58  
59  
60

1  
2  
3 295 Material for results of multiple univariate sensitive analysis on all inputs). These inputs include  
4  
5 296 the probability of (i) making successful contact with adults about the CRC screening programme,  
6  
7 297 (ii) adults agreeing to participate, (iii) adults being eligible to participate in the programme, and  
8  
9 298 (iv) the cost of consumables that are required to take a stool sample. The first three inputs  
10  
11  
12 299 influence the number of individuals who are present at each stage of the patient pathway.

13  
14  
15 300 (Figure 3 is about here)

16  
17 301 The net budget impact would increase from RM107 million to RM130 million (~I\$74-90  
18  
19 302 million) if there was a 20% increase in (i) the probability of adults who were contactable (from  
20  
21 303 a contact list of people aged 50-75 years old) or (ii) the probability of adults agreeing to  
22  
23 304 participate in the CRC screening programme or (iii) the probability of adults being eligible for  
24  
25 305 the programme (i.e., aged 50-75 years old; having no symptoms of CRC, a smartphone, and  
26  
27 306 WhatsApp; resident within programme area; and did not have colonoscopy this year). In other  
28  
29 307 words, a 20% increase in each one of these factors would require an additional RM23 million  
30  
31 308 (~I\$16 million) to be budgeted for the programme. Likewise, a 20% increase in the cost of the  
32  
33 309 consumables that are required for taking stool samples would mean that the programme would  
34  
35 310 cost RM15 million (~I\$10 million) more than the originally calculated total cost.  
36  
37  
38  
39

40 311

## 41 42 43 312 **DICUSSION**

44  
45  
46 313 The result of this analysis provides information to guide public health service planners and  
47  
48 314 commissioners in their decisions about an alternative CRC screening strategy i.e., a population-  
49  
50 315 based CRC screening programme using home-based iFOBT compared to current opportunistic  
51  
52 316 screening. It concluded that the net budget impact in the 1<sup>st</sup> year of implementing a CRC  
53  
54 317 screening programme of this kind would be RM107,631,959 (~I\$74,692,546). The impact  
55  
56 318 would increase by year due to increase in uptake and would reach RM148,485,812  
57  
58 319 (~I\$103,043,589) in the 5<sup>th</sup> year of implementation. This analytical approach and the results of  
59  
60

1  
2  
3 320 this analysis are presented as aids to better decision making by MoHs and stakeholders in  
4  
5 321 lower-middle-income countries (LMICs) about health programme planning and in this  
6  
7 322 particular illustrative case to the MoHM regarding the degree to which the proposed CRC  
8  
9 323 screening programme is affordable.

10  
11  
12 324

13  
14 325 The total budget that was allocated to the MoHM in 2022 was RM32.4 billion (~I\$22.5 million)  
15  
16 326 [25]. Spending on prevention and public health services in 2009 was reported to be RM1.6  
17  
18 327 billion (~I\$1.1 million) [22]. More recent data and information about the size of the budget that  
19  
20 328 is allocated to cancer screening is not available. As such, it is estimated that the net budget  
21  
22 329 impact of implementing a CRC screening programme would account for between 7-10% of the  
23  
24 330 total budget for prevention and public health services. This represents a significant proportion  
25  
26 331 of the overall budget allocated for prevention programmes/interventions.

27  
28  
29 332

30  
31 333 The key factor in the implementation of a population-based screening programme/service or the  
32  
33 334 factor that has biggest impact on the budget is the size of the population who use the service. The  
34  
35 335 degree of accuracy regarding population size estimates is related closely to the cost estimates in  
36  
37 336 the budget. It is important for service planners to keep this point in mind and to take into account  
38  
39 337 an increase in uptake and the impact of such an increase. Therefore, in the case of the CRC  
40  
41 338 programme presented here, we assumed a 5% increase annually in uptake and calculated the net  
42  
43 339 budget impact. The net budget impact can be recalculated according to the actual change in uptake  
44  
45 340 after the programme is implemented.

46  
47  
48 341

49  
50 342 Budget impact analysis is an economic assessment that is used to estimate the changes in  
51  
52 343 expenditure of a specific budget holder if a new health technology/programme is implemented  
53  
54 344 [11]. As such, BIA complements other health economic evaluation methods such as cost-

1  
2  
3 345 effectiveness analysis (CEA) to provide a comprehensive economic assessment of a health care  
4  
5 346 intervention to decision makers [11]. A BIA aids decision making by health service planners  
6  
7 347 and commissioners about whether an intervention or programme is affordable within given  
8  
9 348 budget constraints while a CEA informs decisions about whether an intervention is good value  
10  
11 349 for money [11, 26]. BIA and its pragmatic approach is an ideal method when a situation calls  
12  
13 350 for an evaluation of 'affordability' which is of central importance in LMICs and, arguably, is  
14  
15 351 the key concern of whoever is in charge of managing a health care budget [27, 28].  
16  
17  
18  
19  
20

21 352  
22 353 It could well be that savings in earlier treatment would counterbalance the additional budget  
23  
24 354 impact. Likewise, reduction in travel and time costs of participant while using home-based  
25  
26 355 screening would reduce the total costs of the screening programme from a societal perspective.  
27  
28 356 However, a BIA is not intended to provide answers to questions about whether or not, in this  
29  
30 357 context, the screening programme is good value for money as it does not take into account the  
31  
32 358 potential improvements in outcomes (e.g., increase quality-related life years) and savings from  
33  
34 359 lower treatment costs for CRC diagnosed at earlier stages. The conduct of other types of  
35  
36 360 economic evaluations such as a cost-effectiveness analysis would be required to provide a  
37  
38 361 complete and comprehensive set of evidence for decision makers.  
39  
40  
41  
42  
43

44 362  
45 363 Finally, the conduct of BIA in this paper has some limitations. First, assumptions and cost  
46  
47 364 inputs for the CRC screening programme were based on the costs and rates that were observed  
48  
49 365 in the CRC-SIM research project. Due to unavailability of data about dispersion of the  
50  
51 366 parameters, the used range of variation ( $\pm 20\%$  of the base case) may overestimate the  
52  
53 367 uncertainty and suggests that the next step for further research is a CEA where parameter  
54  
55 368 uncertainty is investigated with actual data. The project was conducted in only one district  
56  
57 369 (Segamat); and the distribution of three main ethnic groups (i.e., Malay, Chinese, Indian) in  
58  
59  
60

1  
2  
3 370 the project differed from the proportions that have been reported nation-wide (72%:24%:3%  
4  
5 371 vs 62%:21%:6%, respectively). Therefore, it is important to be mindful of the possibility that  
6  
7 372 the assumptions and inputs (based on the project) may not be representative for, or read across  
8  
9  
10 373 to, the whole population of Malaysia. Likewise, it is important to bear in mind that our findings  
11  
12 374 do not include the perspective of other payers and may not generalise to other settings. The  
13  
14 375 results are related directly to the context of the Malaysian health system and the epidemiology  
15  
16 376 of CRC in the country though they are illustrative of the positive contribution of the BIA  
17  
18 377 methodology and approach.  
19  
20  
21  
22 378

## 23 24 25 379 **CONCLUSIONS**

26  
27 380 This study employed a BIA methodology to analyse the costs of a novel CRC screening  
28  
29 381 programme using home-based iFOBT and mHealth versus the current opportunistic screening.  
30  
31 382 The findings estimated the net budget impact of implementing a population-based national  
32  
33 383 CRC screening programme in Malaysia. The modelling estimations are important  
34  
35 384 considerations for health authorities when they are required to decide the affordability of  
36  
37 385 implementing a programme and to aid budgetary planning as well as decision making,  
38  
39 386 generally, about implementation. Our study illustrates the use and value of the BIA approach  
40  
41 387 in LMICs and resource-constrained settings.  
42  
43  
44  
45  
46

## 47 388 **Abbreviations**

|    |         |                                                       |
|----|---------|-------------------------------------------------------|
| 48 | BIA     | Budget impact analysis                                |
| 49 | CEA     | Cost-effectiveness analysis                           |
| 50 | CRC     | Colorectal cancer                                     |
| 51 | CRC-SIM | Colorectal Cancer Screening Intervention for Malaysia |
| 52 |         |                                                       |
| 53 |         |                                                       |
| 54 |         |                                                       |
| 55 |         |                                                       |
| 56 |         |                                                       |
| 57 |         |                                                       |
| 58 |         |                                                       |
| 59 |         |                                                       |
| 60 |         |                                                       |

|    |       |                                                                     |
|----|-------|---------------------------------------------------------------------|
| 1  |       |                                                                     |
| 2  |       |                                                                     |
| 3  | iFOBT | Immunochemical faecal occult blood test                             |
| 4  |       |                                                                     |
| 5  | I\$   | International Dollar                                                |
| 6  |       |                                                                     |
| 7  |       |                                                                     |
| 8  | ISPOR | The Professional Society for Health Economics and Outcomes Research |
| 9  |       |                                                                     |
| 10 | MoHM  | Ministry of Health of Malaysia                                      |
| 11 |       |                                                                     |
| 12 | NICE  | National Institute for Health and Care Excellence                   |
| 13 |       |                                                                     |
| 14 |       |                                                                     |
| 15 | RM    | Malaysian ringgit                                                   |
| 16 |       |                                                                     |
| 17 | SEACO | Southeast Asia Community Observatory                                |
| 18 |       |                                                                     |
| 19 | UK    | The United Kingdom                                                  |
| 20 |       |                                                                     |

389

## 390 **DECLARATIONS**

391 **Research ethics approval.** Not applicable (This study does not involve human participants).

392 **Funding.** This research was supported by the Medical Research Council (UK) Global  
 393 Challenges Research Fund (MR/S014349/1) and the National Medical Research Register  
 394 Malaysia (NMRR ID-21-02045-O7G). The funder of the study had no role in study design,  
 395 data collection, data analysis, data interpretation, or writing of the report.

396 **Competing interests.** The authors have no conflicts of interest to declare that are relevant to  
 397 the content of this article.

398 **Availability of data and material.** All data generated or analysed during this study are  
 399 included in this published article.

400 **Authors' contributions.** TTN: Methodology, Formal Analysis, Writing – Original draft, Writing –  
 401 Review & Editing. KR, MRS, and DS: Data Curation, Investigation, Writing – Review & Editing. ST:  
 402 Resources, Writing – Review & Editing. TTS, and MD: Conceptualization, Funding acquisition,  
 403 Writing – Review & Editing, Supervision. CON: Methodology, Formal Analysis, Writing – Review &  
 404 Editing, Supervision.



## 405 REFERENCE

- 406 1. Global Cancer Observatory: Cancer Today [Internet]. International Agency for  
407 Research on Cancer. 2020 [cited 12 April 2021]. Available from: <http://gco.iarc.fr/today>.
- 408 2. Malaysian National Cancer Registry Report 2012-2016 [Internet]. Ministry of Health  
409 Malaysia. 2020 [cited April 12, 2022].
- 410 3. Veettil SK, Lim KG, Chaiyakunapruk N, Ching SM, Abu Hassan MR. Colorectal  
411 cancer in Malaysia: Its burden and implications for a multiethnic country. *Asian Journal of*  
412 *Surgery*. 2017;40(6):481-9.
- 413 4. Rawla P, Sunkara T, Barsouk A. Epidemiology of colorectal cancer: incidence,  
414 mortality, survival, and risk factors. *Prz Gastroenterol*. 2019;14(2):89-103.
- 415 5. Tamin NSI, Razalli KA, Sallahuddin SN, Chan HK, Hassan MRA. A 5-year evaluation  
416 of using stool-based test for opportunistic colorectal cancer screening in primary health  
417 institutions across Malaysia. *Cancer epidemiology*. 2020;69:101829.
- 418 6. Ministry of Health Malaysia. Clinical Practice Guidelines – Management of Colorectal  
419 Carcinoma. Putrajaya: Malaysia Health Technology Assessment Section (MaHTAS); 2017.
- 420 7. Schliemann D, Ramanathan K, Ibrahim Tamin NSB, Neill C, Cardwell CR, Ismail R,  
421 et al. Implementation of a colorectal cancer screening intervention in Malaysia (CRC-SIM) in  
422 the context of a pandemic: study protocol. *BMJ Open*. 2022;12(9):e058420.
- 423 8. Issa IA, Nouredine M. Colorectal cancer screening: An updated review of the  
424 available options. *World journal of gastroenterology*. 2017;23(28):5086-96.
- 425 9. Mauskopf J. Prevalence-Based Economic Evaluation. *Value in Health*. 1998;1(4):251-  
426 9.
- 427 10. Trueman P, Drummond M, Hutton J. Developing guidance for budget impact analysis.  
428 *Pharmacoeconomics*. 2001;19(6):609-21.
- 429 11. Sullivan SD, Mauskopf JA, Augustovski F, Jaime Caro J, Lee KM, Minchin M, et al.  
430 Budget impact analysis-principles of good practice: report of the ISPOR 2012 Budget Impact  
431 Analysis Good Practice II Task Force. *Value Health*. 2014;17(1):5-14.
- 432 12. Jahn B, Todorovic J, Bundo M, Sroczynski G, Conrads-Frank A, Rochau U, et al.  
433 Budget Impact Analysis of Cancer Screening: A Methodological Review. *Appl Health Econ*  
434 *Health Policy*. 2019;17(4):493-511.
- 435 13. Arrospide A, Idigoras I, Mar J, de Koning H, van der Meulen M, Soto-Gordoa M, et al.  
436 Cost-effectiveness and budget impact analyses of a colorectal cancer screening programme in  
437 a high adenoma prevalence scenario using MISCAN-Colon microsimulation model. *BMC*  
438 *Cancer*. 2018;18(1):464.
- 439 14. Phisalprapa P, Supakankunti S, Chaiyakunapruk N. Cost-effectiveness and budget  
440 impact analyses of colorectal cancer screenings in a low- and middle-income country: example  
441 from Thailand. *Journal of medical economics*. 2019;22(12):1351-61.
- 442 15. Mauskopf JA, Sullivan SD, Annemans L, Caro J, Mullins CD, Nuijten M, et al.  
443 Principles of good practice for budget impact analysis: report of the ISPOR Task Force on good  
444 research practices--budget impact analysis. *Value Health*. 2007;10(5):336-47.
- 445 16. World Economic Outlook Databases [Internet]. 2022 [cited April 13]. Available from:  
446 [https://www.imf.org/en/Publications/SPROLLS/world-economic-outlook-](https://www.imf.org/en/Publications/SPROLLS/world-economic-outlook-databases#sort=%40imfdate%20descending)  
447 [databases#sort=%40imfdate%20descending](https://www.imf.org/en/Publications/SPROLLS/world-economic-outlook-databases#sort=%40imfdate%20descending).
- 448 17. Budget impact analysis of a population-based screening programme for colorectal  
449 cancer in Malaysia: technical report of a modelling study [Internet]. Centre for Public Health,  
450 Queen's University Belfast. 2022 [cited July 1]. Available from:  
451 [https://pure.qub.ac.uk/en/publications/budget-impact-analysis-of-a-population-based-](https://pure.qub.ac.uk/en/publications/budget-impact-analysis-of-a-population-based-screening-programme-)  
452 [screening-programme-](https://pure.qub.ac.uk/en/publications/budget-impact-analysis-of-a-population-based-screening-programme-).

18. Malaysia Population Pyramid 2022 [Internet]. World Population Review. [cited Jan 21, 2022]. Available from: <https://worldpopulationreview.com/countries/malaysia-population>.
19. Demographic Statistics Factsheet [Internet]. Department Statistics of Malaysia. 2021 [cited Jan 21, 2022]. Available from: [https://www.dosm.gov.my/v1/index.php?r=column/cthemByCat&cat=430&bul\\_id=N05ydDRXR1BJWVITdDY4TldHd253dz09&menu\\_id=L0pheU43NWJwRWVVSZklWdzQ4TlhUUT09](https://www.dosm.gov.my/v1/index.php?r=column/cthemByCat&cat=430&bul_id=N05ydDRXR1BJWVITdDY4TldHd253dz09&menu_id=L0pheU43NWJwRWVVSZklWdzQ4TlhUUT09).
20. Medical Officer Grade UD41 [Internet]. Public Services Commission of Malaysia. [cited January 27, 2022]. Available from: <https://www.spa.gov.my/spa/laman-utama/gaji-syarat-lantikan-deskripsi-tugas/ijazah-sarjana-phd/pegawai-perubatan-gred-ud41>.
21. Medical laboratory technologist Grade U29 [Internet]. Public Services Commission of Malaysia. [cited January 27, 2022]. Available from: [https://www.interactive.jpa.gov.my/ezskim/klasifikasi/perbekalanskim.asp?id\\_skim=3LU03](https://www.interactive.jpa.gov.my/ezskim/klasifikasi/perbekalanskim.asp?id_skim=3LU03).
22. Jaafar S, Noh KM, Muttalib KA, Othman NH, Healy J. Malaysia Health System Review. Asia Pacific Observatory on Health Systems and Policies; 2013.
23. Health Information and Quality Authority. Guidelines for the budget impact analysis of health technologies in Ireland. 2018.
24. M.Gray A, Clarke PM, Wolstenholme JL, Wordsworth S. Applied Methods of Cost-effectiveness Analysis in Health Care. Gray AM, Briggs A, editors. New York: Oxford University Press; 2011.
25. Ministry of Finance Malaysia. Budget 2022: RM32.4 billion allocation for MOH. Official Portal of Ministry of Finance Malaysia. 2021 [cited 2022 April 13]. Available from: <https://www.mof.gov.my/portal/en/news/press-citations/budget-2022-rm32-4-billion-allocation-for-moh>.
26. Leelahavarong P. Budget Impact Analysis. J Med Assoc Thai. 2014;97(Suppl. 5):S65-S71.
27. Orlewska E, Gulácsi L. Budget-Impact Analyses: A Critical Review of Published Studies. PharmacoEconomics. 2009;27(10):807-27.
28. Garattini L, van de Vooren K. Budget impact analysis in economic evaluation: a proposal for a clearer definition. The European Journal of Health Economics. 2011;12(6):499.

## 484 **Figure Legends and Tables**

485 Table 1 Input assumptions used to estimate the population at each stage of the patient pathways

486 Table 2 Resources and unit costs

487 Table 3 Annual cost of proposed practice (i.e., CRC screening programme)

488  
489 Figure 1 Patient pathways in 'usual care' practice - opportunistic screening for CRC

490 Figure 2 Patient pathway in population-based CRC screening programme

491 Figure 3 Results of multiple univariate sensitive analyses showing key factors that exert most  
492 influence the net budget impact

1  
2  
3 493 **Supplementary material**  
4

5 494 Figure S1 Visual depiction of the budget impact cost calculator  
6

7  
8 495 Table S1 Net budget impact of CRC screening programme over 5-year timeframe, by state  
9

10 496 Table S2 Sensitivity of the total budget impact of CRC screening programme to changes in  
11  
12 497 each variable individually  
13  
14  
15  
16  
17  
18  
19  
20  
21  
22  
23  
24  
25  
26  
27  
28  
29  
30  
31  
32  
33  
34  
35  
36  
37  
38  
39  
40  
41  
42  
43  
44  
45  
46  
47  
48  
49  
50  
51  
52  
53  
54  
55  
56  
57  
58  
59  
60

For peer review only

Figure 1: Patient pathway in 'usual care' practice - opportunistic screening for CRC



**Figure 2: Patient pathway in population-based CRC screening programme**

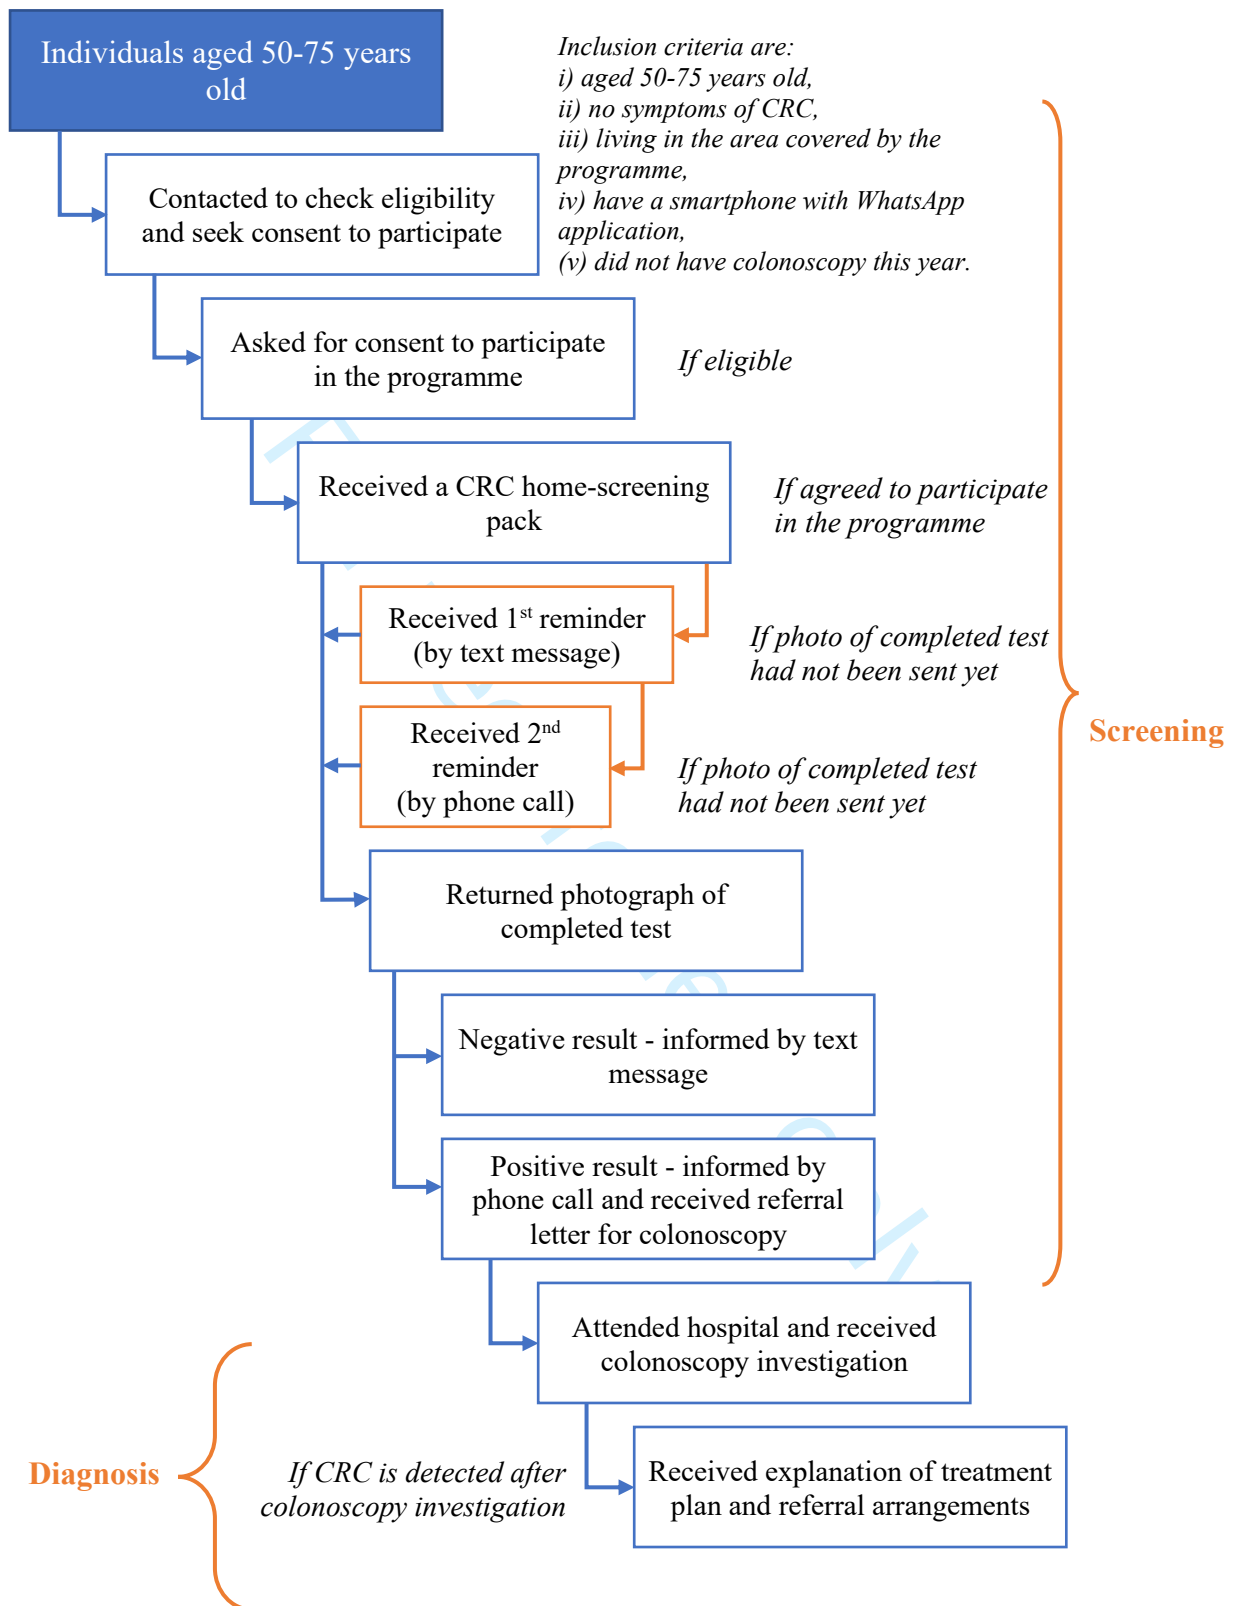

**Figure 3: Results of multiple univariate sensitive analyses showing key factors that exert most influence the net budget impact**

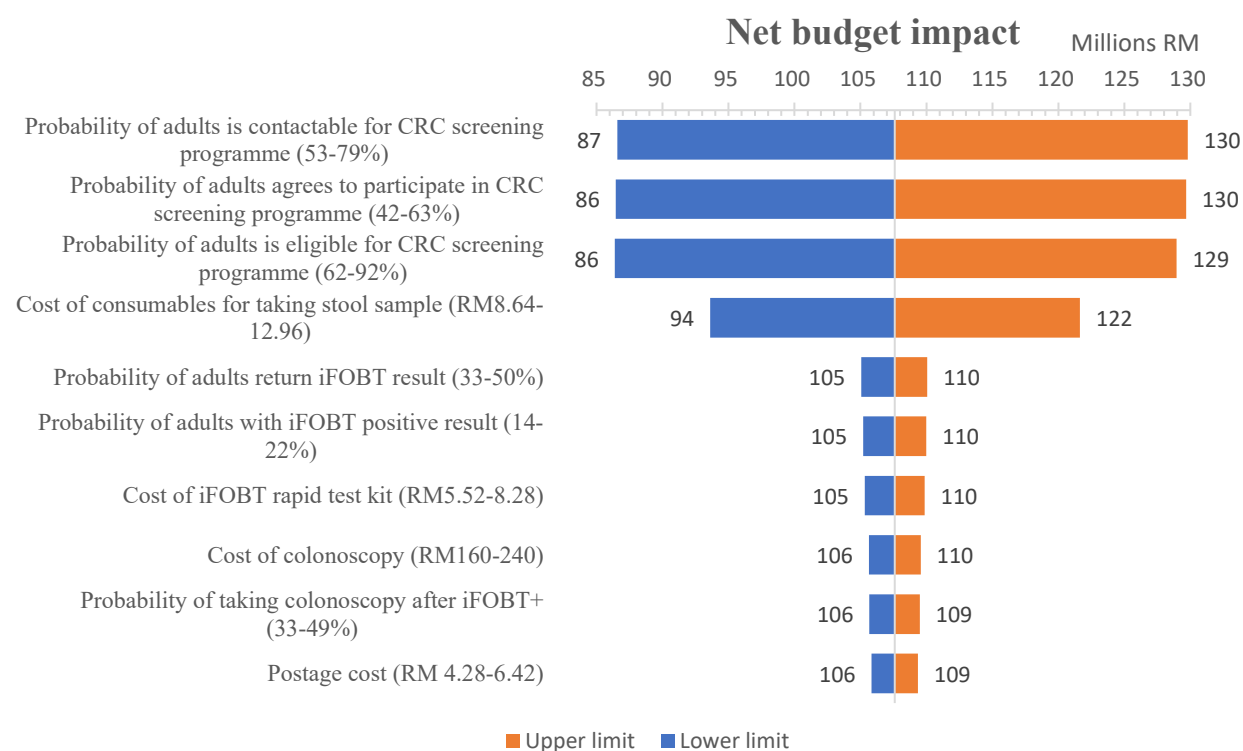

Supplementary material

Figure S1: Visual depiction of the budget impact cost calculator

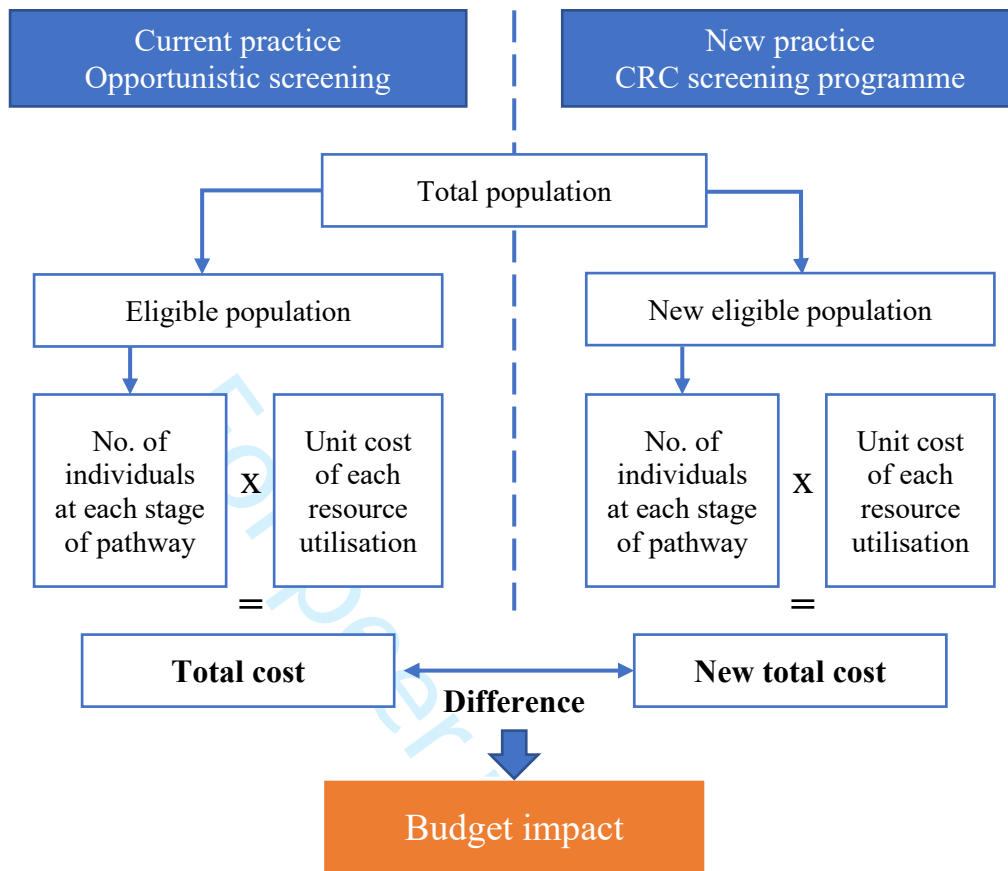

## Supplementary material

**Table S1: Net budget impact of CRC screening programme over 5-year timeframe, by state**

Currency: Malaysian ringgit

| State                    | Population        | Year 1             | Year 2             | Year 3             | Year 4             | Year 5             |
|--------------------------|-------------------|--------------------|--------------------|--------------------|--------------------|--------------------|
| <b>Johor</b>             | 3,822,800         | 12,597,041         | 13,791,897         | 14,986,752         | 16,181,607         | 17,376,462         |
| <b>Kedah</b>             | 2,206,200         | 7,272,541          | 7,962,112          | 8,651,682          | 9,341,252          | 10,030,823         |
| <b>Kelantan</b>          | 1,884,300         | 6,212,311          | 6,801,268          | 7,390,225          | 7,979,183          | 8,568,140          |
| <b>Melaka</b>            | 934,700           | 3,084,637          | 3,376,787          | 3,668,937          | 3,961,087          | 4,253,238          |
| <b>Negeri Sembilan</b>   | 1,141,000         | 3,764,122          | 4,120,753          | 4,477,384          | 4,834,016          | 5,190,647          |
| <b>Pahang</b>            | 1,702,900         | 5,614,833          | 6,147,092          | 6,679,351          | 7,211,609          | 7,743,868          |
| <b>Perak</b>             | 2,569,300         | 8,468,450          | 9,271,511          | 10,074,572         | 10,877,633         | 11,680,693         |
| <b>Pulau Pinang</b>      | 1,767,100         | 5,826,301          | 6,378,626          | 6,930,951          | 7,483,276          | 8,035,601          |
| <b>Sabah</b>             | 3,919,600         | 12,915,864         | 14,140,975         | 15,366,086         | 16,591,197         | 17,816,308         |
| <b>Sarawak</b>           | 2,829,400         | 9,325,144          | 10,209,501         | 11,093,859         | 11,978,217         | 12,862,575         |
| <b>Terengganu</b>        | 1,245,300         | 4,107,648          | 4,496,879          | 4,886,111          | 5,275,342          | 5,664,573          |
| <b>Perlis</b>            | 253,500           | 841,028            | 920,262            | 999,496            | 1,078,730          | 1,157,964          |
| <b>W.P. Kuala Lumpur</b> | 1,790,100         | 5,902,043          | 6,461,557          | 7,021,071          | 7,580,585          | 8,140,099          |
| <b>W.P. Labuan</b>       | 99,000            | 332,138            | 363,081            | 394,024            | 424,968            | 455,911            |
| <b>W.P. Putrajaya</b>    | 97,100            | 325,886            | 356,236            | 386,585            | 416,935            | 447,284            |
| <b>Nation-wide</b>       | <b>32,676,786</b> | <b>107,631,959</b> | <b>117,845,422</b> | <b>128,058,885</b> | <b>138,272,349</b> | <b>148,485,812</b> |

CRC: Colorectal cancer | W.P.: The Federal Territories (Malay: Wilayah Persekutuan)

Readers can convert from Malaysian Ringgit to their currency of interest (e.g., International Dollar, US Dollar, British Pound, Euro etc.) using the free web-based tool ‘CCEMG – EPPI-Centre Cost Converter’ (<https://eppi.ioe.ac.uk/costconversion/default.aspx>). This tool help adjusting estimates of cost expressed in one currency and price year to a specific target currency and price year.



## Supplementary material

*Table S2: Sensitivity of the total budget impact of CRC screening programme to changes in each variable individually*

Baseline budget impact=RM107,631,959

*Unit: Thousand Ringgit Malaysia*

|                                                                                                         | Baseline value | Min value (-20% from baseline) | Max value (+20% from baseline) | Min budget impact | Max budget impact | Change |
|---------------------------------------------------------------------------------------------------------|----------------|--------------------------------|--------------------------------|-------------------|-------------------|--------|
| Probability of adults is contactable for CRC screening programme                                        | 66%            | 53%                            | 79%                            | 86,574            | 129,818           | 43,244 |
| Probability of adults is included (eligible for CRC screening programme)                                | 77%            | 62%                            | 92%                            | 86,386            | 128,950           | 42,564 |
| Probability of adults agree to participate in CRC screening programme after being invited               | 52%            | 42%                            | 63%                            | 86,454            | 129,675           | 43,221 |
| Probability of adults needing 1st reminder                                                              | 79%            | 63%                            | 94%                            | 107,430           | 107,766           | 336    |
| Probability of adults needing 2nd reminder                                                              | 88%            | 70%                            | 100%                           | 107,535           | 107,643           | 108    |
| Probability of adults return iFOBT result                                                               | 42%            | 33%                            | 50%                            | 105,062           | 110,060           | 4,998  |
| Probability of adults with iFOBT positive result                                                        | 18%            | 14%                            | 22%                            | 105,204           | 109,988           | 4,784  |
| Probability of adults taking colonoscopy after positive iFOBT                                           | 41%            | 33%                            | 49%                            | 105,673           | 109,493           | 3,820  |
| Probability of adults with CRC detection after getting colonoscopy                                      | 4%             | 3%                             | 5%                             | 107,594           | 107,603           | 9      |
| Cost to perform the screening (asking for symptoms, family history, referral)                           | 5.58           | 4.47                           | 6.70                           | 107,633           | 107,567           | -66    |
| Cost of stool specimen processing                                                                       | 1.70           | 1.36                           | 2.04                           | 107,610           | 107,590           | -20    |
| Interpretation of results                                                                               | 2.79           | 2.23                           | 3.35                           | 107,617           | 107,583           | -34    |
| Cost to convey definitive diagnosis to patients (along with explaining treatment plan or referral etc.) | 8.37           | 6.70                           | 10.05                          | 107,597           | 107,604           | 7      |
| Contact eligible individuals - agreed to participate                                                    | 0.98           | 0.79                           | 1.18                           | 107,285           | 107,926           | 641    |
| Contact eligible individuals - rejected/excluded to participate                                         | 0.47           | 0.38                           | 0.56                           | 107,465           | 107,735           | 270    |
| iFOBT rapid test kit (only the rapid test kit itself)                                                   | 6.90           | 5.52                           | 8.28                           | 105,331           | 109,870           | 4,539  |
| Print materials (instruction leaflet, explanatory statement)                                            | 1.10           | 0.88                           | 1.32                           | 107,238           | 107,962           | 724    |
| Postage (stamp etc.)                                                                                    | 5.35           | 4.28                           | 6.42                           | 105,840           | 109,360           | 3,520  |
| Sending video through Whatapp                                                                           | 0.41           | 0.33                           | 0.50                           | 107,461           | 107,740           | 279    |
| Sending reminder text message                                                                           | 0.41           | 0.33                           | 0.50                           | 107,490           | 107,710           | 220    |
| Reminder call                                                                                           | 0.28           | 0.22                           | 0.33                           | 107,536           | 107,661           | 125    |
| Interpret the test kit result                                                                           | 1.70           | 1.36                           | 2.04                           | 107,366           | 107,832           | 466    |

Supplementary material

*Unit: Thousand Ringgit Malaysia*

|                                                                                                        | <b>Baseline value</b> | <b>Min value (-20% from baseline)</b> | <b>Max value (+20% from baseline)</b> | <b>Min budget impact</b> | <b>Max budget impact</b> | <b>Change</b> |
|--------------------------------------------------------------------------------------------------------|-----------------------|---------------------------------------|---------------------------------------|--------------------------|--------------------------|---------------|
| Sending text message informing negative result                                                         | 0.45                  | 0.36                                  | 0.54                                  | 107,550                  | 107,651                  | 101           |
| Call to inform positive result                                                                         | 0.41                  | 0.33                                  | 0.50                                  | 107,590                  | 107,611                  | 21            |
| Prepare and send referral letter                                                                       | 1.12                  | 0.90                                  | 1.35                                  | 107,573                  | 107,628                  | 55            |
| Follow up effort                                                                                       | 6.73                  | 5.39                                  | 8.08                                  | 107,503                  | 107,698                  | 195           |
| Colonoscopy                                                                                            | 200                   | 160                                   | 240                                   | 105,638                  | 109,564                  | 3,926         |
| Consumables – stool container, gloves, mask, plastic waste bag and disposal of materials from the test | 10.80                 | 8.64                                  | 12.96                                 | 93,612                   | 121,641                  | 28,029        |

1  
2  
3  
4  
5  
6  
7  
8  
9  
10  
11  
12  
13  
14  
15  
16  
17  
18  
19  
20  
21  
22  
23  
24  
25  
26  
27  
28  
29  
30  
31  
32  
33  
34  
35  
36  
37  
38  
39  
40  
41  
42  
43  
44  
45  
46

ISPOR—The Professional Society for Health Economics and Outcomes Research

## Budget Impact Analysis—Principles of Good Practice: Report of the ISPOR 2012 Budget Impact Analysis Good Practice II Task Force

Citation: Sullivan SD, Mauskopf JA, Augustovski F, Jaime Caro J, Lee KM, Minchin M, Orlewska E, Penna P, Rodriguez Barrios JM, Shau WY. Budget impact analysis-principles of good practice: report of the ISPOR 2012 Budget Impact Analysis Good Practice II Task Force. Value Health. 2014 Jan-Feb;17(1):5-14. doi: <https://doi.org/10.1016/j.jval.2013.08.2291>

### Recommendations for Reporting Format

| Section/topic                                 | Guidance for reporting                                                                                                                                                                                                 | Reported in section                                                                          |
|-----------------------------------------------|------------------------------------------------------------------------------------------------------------------------------------------------------------------------------------------------------------------------|----------------------------------------------------------------------------------------------|
| <b>Introduction</b>                           |                                                                                                                                                                                                                        |                                                                                              |
| Objectives                                    | The objective of the BIA should be clearly stated and tied to the study perspectives                                                                                                                                   | Introduction                                                                                 |
| Epidemiology and management of health problem | Present information about the prevalence and incidence of the particular disease, disease severity, disease progression, undiagnosed or undertreated cases, and risk factors pertinent to estimating the budget impact | Introduction                                                                                 |
| Clinical impact                               | Consist of a brief description of the eligible population and existing management options and their efficacy and safety that are relevant to the design of the study of the BIA                                        | Introduction                                                                                 |
| Economic impact                               | Include a brief description of previous BIAs in the condition of interest for another intervention and condition-specific treatment patterns and cost-of-care studies                                                  | Not applicable (No previous BIA)                                                             |
| <b>Study Design and Methods</b>               |                                                                                                                                                                                                                        |                                                                                              |
| Patient population                            | Specify the eligible population for the new intervention                                                                                                                                                               | Methods<br>Sub-section: Eligible population and input assumptions<br>Table 1                 |
| Intervention mix                              | Contain a detailed description of the use and characteristics of each intervention in the current intervention mix and in the expected intervention mix after the introduction of the new intervention                 | Methods<br>Sub-section: Health service under assessment and its comparator<br>Figure 1 and 2 |
| Time horizon                                  | Should be presented and the choice(s) justified                                                                                                                                                                        | Methods<br>Sub-section: Perspective and time horizon                                         |
| Perspective                                   | Identify the BIAs' perspective(s), the cost categories included, and the intended audience                                                                                                                             | Methods<br>Perspective and time horizon                                                      |

## ISPOR—The Professional Society for Health Economics and Outcomes Research

| Section/topic                           | Guidance for reporting                                                                                                                                                                                                                                                                                                                                                                                          | Reported in section                                                                             |
|-----------------------------------------|-----------------------------------------------------------------------------------------------------------------------------------------------------------------------------------------------------------------------------------------------------------------------------------------------------------------------------------------------------------------------------------------------------------------|-------------------------------------------------------------------------------------------------|
| Analytic framework description          | Complete description of the structure of the BIA cost calculator or condition-specific cohort or individual simulation model                                                                                                                                                                                                                                                                                    | Methods<br>Sub-section: Eligible population and input assumptions                               |
| Input data                              | Input values used for the reported analyses, including alternative scenarios, should be presented                                                                                                                                                                                                                                                                                                               | Methods<br>Sub-section: Cost input and data sources<br>Table 2                                  |
| Data sources                            | The sources of data inputs should be described in detail                                                                                                                                                                                                                                                                                                                                                        | Methods<br>Sub-section: Cost input and data sources<br>Table 2                                  |
| Data collection                         | The methods and processes for any primary data collection and data abstraction tasks not reported elsewhere should be described and explained.                                                                                                                                                                                                                                                                  | Not applicable (secondary data)                                                                 |
| Analyses                                | A description of the calculations used to complete the BIA should be provided. The choice of all the scenarios presented in the results should be documented and justified.                                                                                                                                                                                                                                     | Methods<br>Sub-section: Computing framework and base-case analysis under budget impact analyses |
| Uncertainty                             | Uncertainty analysis methods should be described and justified                                                                                                                                                                                                                                                                                                                                                  | Methods<br>Sub-sections:<br>Uncertainty and scenario analyses under budget impact analyses      |
| <b>Results</b>                          | The budget impact should be presented for each budget period over the time horizon. Both budget period resource use and costs should be presented. The estimates of resource use should be listed in a table that shows the change in use for each time period reported in the BIA<br><br>The results of the uncertainty analyses and scenarios analyzed should be described and presented in figures or tables | Results<br>Table 3<br><br>Results<br>Figure 2                                                   |
| <b>Conclusions and Limitations</b>      | State the main conclusions on the basis of the results of the BIA.<br>Report the main limitations regarding key issues such as design aspects including off-label use and adherence assumptions and the completeness and quality of data inputs and sources.                                                                                                                                                    | Discussion<br><br>Conclusion                                                                    |
| <b>Inclusion of Graphics and Tables</b> |                                                                                                                                                                                                                                                                                                                                                                                                                 |                                                                                                 |
| Figure of the analytical framework      | Flow diagrams or other visual depictions of the cost calculator or condition-specific cohort or individual simulation model are recommended to be included with the analytical framework description.                                                                                                                                                                                                           | Supplementary material<br>Figure S1                                                             |

## ISPOR—The Professional Society for Health Economics and Outcomes Research

| Section/topic                                    | Guidance for reporting                                                                                                                                                                                                          | Reported in section |
|--------------------------------------------------|---------------------------------------------------------------------------------------------------------------------------------------------------------------------------------------------------------------------------------|---------------------|
| Table of assumptions                             | All the major assumptions should be listed in a tabular form                                                                                                                                                                    | Table 1             |
| Tables of inputs                                 | All the input parameter values and their data sources and derivations should be presented in a tabular form                                                                                                                     | Table 2             |
| Tables of outputs                                | All outputs should be presented in a tabular and/or graphical Form                                                                                                                                                              | Table 3             |
| Schematic representation of uncertainty analyses | Diagrams such as Tornado diagrams should be included along with the text on the results of the scenario analyses                                                                                                                | Figure 3            |
| Appendices and References                        | The appendices may cover literature search strategies, evidence summaries, intermediate results (e.g., of individual Delphi panel rounds), and the names and addresses of participating experts and investigators, for example. | Reference           |

## CHEERS 2022 Checklist

| Topic                                | No. | Item                                                                                                                            | Location where item is reported      |
|--------------------------------------|-----|---------------------------------------------------------------------------------------------------------------------------------|--------------------------------------|
| <b>Title</b>                         |     |                                                                                                                                 |                                      |
|                                      | 1   | Identify the study as an economic evaluation and specify the interventions being compared.                                      | Title page, Page 1                   |
| <b>Abstract</b>                      |     |                                                                                                                                 |                                      |
|                                      | 2   | Provide a structured summary that highlights context, key methods, results, and alternative analyses.                           | Abstract, Page 1                     |
| <b>Introduction</b>                  |     |                                                                                                                                 |                                      |
| <b>Background and objectives</b>     | 3   | Give the context for the study, the study question, and its practical relevance for decision making in policy or practice.      | Introduction, Line 65-69             |
| <b>Methods</b>                       |     |                                                                                                                                 |                                      |
| <b>Health economic analysis plan</b> | 4   | Indicate whether a health economic analysis plan was developed and where available.                                             | Not applicable                       |
| <b>Study population</b>              | 5   | Describe characteristics of the study population (such as age range, demographics, socioeconomic, or clinical characteristics). | Methods, Line 123-152, Table 1       |
| <b>Setting and location</b>          | 6   | Provide relevant contextual information that may influence findings.                                                            | Methods, Line 79-92                  |
| <b>Comparators</b>                   | 7   | Describe the interventions or strategies being compared and why chosen.                                                         | Methods, Line 79-121, Figure 1 and 2 |
| <b>Perspective</b>                   | 8   | State the perspective(s) adopted by the study and why chosen.                                                                   | Methods, Line 199-202                |
| <b>Time horizon</b>                  | 9   | State the time horizon for the study and why appropriate.                                                                       | Methods, Line 204-205                |
| <b>Discount rate</b>                 | 10  | Report the discount rate(s) and reason chosen.                                                                                  | Methods, Line 205-206                |
| <b>Selection of outcomes</b>         | 11  | Describe what outcomes were used as the measure(s) of benefit(s) and harm(s).                                                   | Not applicable                       |

| Topic                                                                        | No. | Item                                                                                                                                                                          | Location where item is reported                           |
|------------------------------------------------------------------------------|-----|-------------------------------------------------------------------------------------------------------------------------------------------------------------------------------|-----------------------------------------------------------|
| <b>Measurement of outcomes</b>                                               | 12  | Describe how outcomes used to capture benefit(s) and harm(s) were measured.                                                                                                   | Not applicable                                            |
| <b>Valuation of outcomes</b>                                                 | 13  | Describe the population and methods used to measure and value outcomes.                                                                                                       | Not applicable                                            |
| <b>Measurement and valuation of resources and costs</b>                      | 14  | Describe how costs were valued.                                                                                                                                               | Methods, Line 159-196                                     |
| <b>Currency, price date, and conversion</b>                                  | 15  | Report the dates of the estimated resource quantities and unit costs, plus the currency and year of conversion.                                                               | Methods, Line 73-76                                       |
| <b>Rationale and description of model</b>                                    | 16  | If modelling is used, describe in detail and why used. Report if the model is publicly available and where it can be accessed.                                                | Not applicable                                            |
| <b>Analytics and assumptions</b>                                             | 17  | Describe any methods for analysing or statistically transforming data, any extrapolation methods, and approaches for validating any model used.                               | Methods, Line 211-221, Figure S1 (Supplementary Material) |
| <b>Characterising heterogeneity</b>                                          | 18  | Describe any methods used for estimating how the results of the study vary for subgroups.                                                                                     | Not applicable                                            |
| <b>Characterising distributional effects</b>                                 | 19  | Describe how impacts are distributed across different individuals or adjustments made to reflect priority populations.                                                        | Not applicable                                            |
| <b>Characterising uncertainty</b>                                            | 20  | Describe methods to characterise any sources of uncertainty in the analysis.                                                                                                  | Methods, Line 224-229, Figure S2 (Supplementary Material) |
| <b>Approach to engagement with patients and others affected by the study</b> | 21  | Describe any approaches to engage patients or service recipients, the general public, communities, or stakeholders (such as clinicians or payers) in the design of the study. | Methods, Line 233-235                                     |
| <b>Results</b>                                                               |     |                                                                                                                                                                               |                                                           |
| <b>Study parameters</b>                                                      | 22  | Report all analytic inputs (such as values, ranges, references) including uncertainty or distributional assumptions.                                                          | Table 1 and 2, Table S2 (Supplementary Material)          |
| <b>Summary of main results</b>                                               | 23  | Report the mean values for the main categories of costs and outcomes of interest and summarise them in the most appropriate overall measure.                                  | Results, Line 239-274, Table 3                            |

| Topic                                                                       | No. | Item                                                                                                                                                                     | Location where item is reported |
|-----------------------------------------------------------------------------|-----|--------------------------------------------------------------------------------------------------------------------------------------------------------------------------|---------------------------------|
| <b>Effect of uncertainty</b>                                                | 24  | Describe how uncertainty about analytic judgments, inputs, or projections affect findings. Report the effect of choice of discount rate and time horizon, if applicable. | Results, Line 277-295, Figure 3 |
| <b>Effect of engagement with patients and others affected by the study</b>  | 25  | Report on any difference patient/service recipient, general public, community, or stakeholder involvement made to the approach or findings of the study                  | Not applicable                  |
| <b>Discussion</b>                                                           |     |                                                                                                                                                                          |                                 |
| <b>Study findings, limitations, generalisability, and current knowledge</b> | 26  | Report key findings, limitations, ethical or equity considerations not captured, and how these could affect patients, policy, or practice.                               | Discussion                      |
| <b>Other relevant information</b>                                           |     |                                                                                                                                                                          |                                 |
| <b>Source of funding</b>                                                    | 27  | Describe how the study was funded and any role of the funder in the identification, design, conduct, and reporting of the analysis                                       | End of manuscript               |
| <b>Conflicts of interest</b>                                                | 28  | Report authors conflicts of interest according to journal or International Committee of Medical Journal Editors requirements.                                            | End of manuscript               |

*From:* Husereau D, Drummond M, Augustovski F, et al. Consolidated Health Economic Evaluation Reporting Standards 2022 (CHEERS 2022) Explanation and Elaboration: A Report of the ISPOR CHEERS II Good Practices Task Force. Value Health 2022;25. doi:10.1016/j.jval.2021.10.008



# BMJ Open

## A budget impact analysis of a home-based colorectal cancer screening programme in Malaysia

|                                 |                                                                                                                                                                                                                                                                                                                                                                                                                                                                                                                                                                                                                                                                                                                                                                                                                                            |
|---------------------------------|--------------------------------------------------------------------------------------------------------------------------------------------------------------------------------------------------------------------------------------------------------------------------------------------------------------------------------------------------------------------------------------------------------------------------------------------------------------------------------------------------------------------------------------------------------------------------------------------------------------------------------------------------------------------------------------------------------------------------------------------------------------------------------------------------------------------------------------------|
| Journal:                        | <i>BMJ Open</i>                                                                                                                                                                                                                                                                                                                                                                                                                                                                                                                                                                                                                                                                                                                                                                                                                            |
| Manuscript ID                   | bmjopen-2022-066925.R3                                                                                                                                                                                                                                                                                                                                                                                                                                                                                                                                                                                                                                                                                                                                                                                                                     |
| Article Type:                   | Original research                                                                                                                                                                                                                                                                                                                                                                                                                                                                                                                                                                                                                                                                                                                                                                                                                          |
| Date Submitted by the Author:   | 09-Mar-2023                                                                                                                                                                                                                                                                                                                                                                                                                                                                                                                                                                                                                                                                                                                                                                                                                                |
| Complete List of Authors:       | Ngan, Tran; Queen's University Belfast, Centre for Public Health<br>Ramanathan, Kogila; Monash University Malaysia, Global Public Health, Jeffrey Cheah School of Medicine and Health Sciences; Monash University Malaysia, South East Asia Community Observatory<br>Saleh, Muhamad; Monash University Malaysia, South East Asia Community Observatory<br>Schliemann, Desiree ; Queen's University Belfast, Centre for Public Health<br>Ibrahim Tamin, Nor Saleha ; Ministry of Health Malaysia<br>Su, Tin ; Monash University Malaysia, Global Public Health, Jeffrey Cheah School of Medicine and Health Sciences; Monash University Malaysia, South East Asia Community Observatory<br>Donnelly, Michael; Queen's University Belfast, Centre for Public Health<br>O'Neill, Ciaran; Queen's University Belfast, Centre for Public Health |
| <b>Primary Subject Heading</b>: | Health economics                                                                                                                                                                                                                                                                                                                                                                                                                                                                                                                                                                                                                                                                                                                                                                                                                           |
| Secondary Subject Heading:      | Global health, Public health, Oncology                                                                                                                                                                                                                                                                                                                                                                                                                                                                                                                                                                                                                                                                                                                                                                                                     |
| Keywords:                       | Health policy < HEALTH SERVICES ADMINISTRATION & MANAGEMENT, ONCOLOGY, HEALTH ECONOMICS, PUBLIC HEALTH                                                                                                                                                                                                                                                                                                                                                                                                                                                                                                                                                                                                                                                                                                                                     |
|                                 |                                                                                                                                                                                                                                                                                                                                                                                                                                                                                                                                                                                                                                                                                                                                                                                                                                            |

SCHOLARONE™  
Manuscripts



I, the Submitting Author has the right to grant and does grant on behalf of all authors of the Work (as defined in the below author licence), an exclusive licence and/or a non-exclusive licence for contributions from authors who are: i) UK Crown employees; ii) where BMJ has agreed a CC-BY licence shall apply, and/or iii) in accordance with the terms applicable for US Federal Government officers or employees acting as part of their official duties; on a worldwide, perpetual, irrevocable, royalty-free basis to BMJ Publishing Group Ltd ("BMJ") its licensees and where the relevant Journal is co-owned by BMJ to the co-owners of the Journal, to publish the Work in this journal and any other BMJ products and to exploit all rights, as set out in our [licence](#).

The Submitting Author accepts and understands that any supply made under these terms is made by BMJ to the Submitting Author unless you are acting as an employee on behalf of your employer or a postgraduate student of an affiliated institution which is paying any applicable article publishing charge ("APC") for Open Access articles. Where the Submitting Author wishes to make the Work available on an Open Access basis (and intends to pay the relevant APC), the terms of reuse of such Open Access shall be governed by a Creative Commons licence – details of these licences and which [Creative Commons](#) licence will apply to this Work are set out in our licence referred to above.

Other than as permitted in any relevant BMJ Author's Self Archiving Policies, I confirm this Work has not been accepted for publication elsewhere, is not being considered for publication elsewhere and does not duplicate material already published. I confirm all authors consent to publication of this Work and authorise the granting of this licence.

1  
2  
3 **A budget impact analysis of a home-based colorectal cancer screening**  
4 **programme in Malaysia**  
5  
6  
7

8  
9 Tran Thu Ngan<sup>1\*</sup>, Kogila Ramanathan<sup>2,3</sup>, Muhamad Raziq Bin Mohd Saleh<sup>3</sup>, Désirée  
10 Schliemann<sup>1</sup>, Nor Saleha Binti Ibrahim Tamin<sup>4</sup>, Tin Tin Su<sup>2,3</sup>, Michael Donnelly<sup>1</sup>, Ciaran  
11 O'Neill<sup>1</sup>  
12  
13

14  
15  
16 <sup>1</sup> *Centre for Public Health, Queen's University Belfast, Belfast, UK*

17  
18 <sup>2</sup> *Global Public Health, Jeffrey Cheah School of Medicine and Health Sciences, Monash*  
19 *University Malaysia, Selangor, Malaysia*  
20

21  
22 <sup>3</sup> *South East Asia Community Observatory (SEACO), Jeffrey Cheah School of Medicine and*  
23 *Health Sciences, Monash University Malaysia*  
24

25  
26 <sup>4</sup> *Ministry of Health Malaysia, Putrajaya, Malaysia*  
27  
28

29  
30  
31  
32 \* Correspondence to:

33  
34 Tran Thu Ngan, PhD

35  
36 Postal address: Centre for Public Health, Queen's University Belfast, Belfast, United Kingdom

37  
38 Email: [n.t.tran@qub.ac.uk](mailto:n.t.tran@qub.ac.uk)  
39  
40  
41

42  
43 ORCID of the authors

44  
45 Tran Thu Ngan : 0000-0003-2771-9878

46  
47 Désirée Schliemann : 0000-0002-8746-3002

48  
49 Ciaran O'Neill : 0000-0001-7668-3934  
50  
51  
52  
53  
54  
55  
56  
57  
58  
59  
60

# 1 A budget impact analysis of a home-based colorectal cancer screening 2 programme in Malaysia

## 3 Abstract

4 **Objectives:** The 2020-2022 research project ‘Colorectal Cancer Screening Intervention for  
5 Malaysia’ (CRC-SIM) evaluated the implementation of a home-based CRC screening pilot in  
6 Segamat District. This budget impact analysis (BIA) assessed the expected changes in health  
7 expenditure of the Malaysian Ministry of Health budget in the scenario where the pilot  
8 programme was implemented nationwide versus current opportunistic screening.

9 **Design:** Budget impact analysis. Assumptions and costs in the opportunistic and novel CRC  
10 screening scenarios were derived from a previous evaluation of opportunistic CRC screening in  
11 community health clinics across Malaysia and the CRC-SIM research project, respectively.

12 **Setting:** National level (with supplement analysis for district level). The BIA was conducted  
13 from the viewpoint of the federal government and estimated the annual financial impact over  
14 a period of five years.

15 **Results:** The total annual cost of the current practice of opportunistic screening was RM1,584,321  
16 (~I\$1,099,460; RM=Ringgit Malaysia; I\$=International dollar) of which 80% (RM1,274,690 or  
17 ~I\$884,587) was expended on the provision of opportunistic CRC to adults who availed of the  
18 service. Regarding the implementation of national CRC screening programme, the net budget  
19 impact in the 1<sup>st</sup> year was estimated to be RM107,631,959 (~I\$74,692,546) and to reach  
20 RM148,485,812 (~I\$103,043,589) in the 5<sup>th</sup> year based on an assumed increased uptake of 5%  
21 annually. The costs were calculated to be sensitive to the probability of adults who were  
22 contactable, eligible, and agreeable to participating in the programme.

23 **Conclusions:** Results from the BIA provided direct and explicit estimates of the budget  
24 changes to when implementing a population-based national CRC screening programme to aid  
25 decision making by health services planners and commissioners in Malaysia about whether  
26 such programme is affordable within given their budget constraint. The study also illustrates  
27 the use and value of the BIA approach in LMICs and resource-constrained settings.

28 **Keywords:** Colorectal cancer screening, budget impact analysis, home-based testing, global  
29 health, Malaysia

### Strengths and limitations of this study

- The budget impact analysis (BIA) was used to evaluate the ‘affordability’ of colorectal cancer (CRC) screening programme in Malaysia within given budget constraint.
- Assumptions and cost inputs for modelling the budget impact were based on the actual costs and rates observed in Malaysia.
- The total cost of resources (=unit costs \* number of users) for opportunistic screening and the CRC screening programme were compared to calculate the net budget impact.
- The BIA was conducted from the viewpoint of the federal government and only included costs and resource requirements relevant to this particular budget holder.
- The BIA could not and was not intended to provide answers to questions about whether or not the screening programme is good value for money (which can be answered by a cost-effectiveness analysis).

## INTRODUCTION

Colorectal cancer (CRC) has the second highest incidence and mortality rate among all types of cancer in both sexes in Malaysia [1]. The age standardised incidence rate in 2012-2016 was 14.8 per 100,000 males and 11.1 per 100,000 females which appears to be stable compared to 2007-2011 [2]. In contrast, the proportion of CRC patients who are diagnosed at a late stage (i.e., stage III or IV) is increasing. Report from Ministry of Health Malaysia (MoHM) showed that the proportion of males with late stage CRC increased from 65.9% during 2007-2011 to 72.4% during 2012-2016; and from 65.2% to 73.1% for females [2]. The report did not give an explanation about this increasing trend though [2]. Late stage diagnosis negatively impacts survival rate; for example, the 5-year survival rates for cases diagnosed at stage I, II, III, and IV in 2002-2004 in Kuala Lumpur were 78.6%, 52.9%, 44.3%, and 9.3%, respectively [3]. Improved survival can be achieved by early detection through screening and the removal of premalignant polyps [4]. However, Malaysia currently does not have a population-based national CRC screening programme.

1  
2  
3 46 The Ministry of Health of Malaysia (MoHM) adopted the use of immunochemical faecal occult  
4  
5 47 blood test (iFOBT) for opportunistic CRC screening at public health clinics since 2014 [5].  
6  
7 48 MoHM guidelines recommend screening for asymptomatic individuals aged 50-75 years old  
8  
9 49 with average risk of CRC [6]. The uptake (number of patients screened/total eligible  
10  
11 50 population) of this opportunistic screening tends to be very low. The annual average uptake  
12  
13 51 during 2014-2018 was 0.5% while the 5-year cumulative uptake was 2.29% due to low  
14  
15 52 awareness about CRC in general and CRC tests in particular, fear of the result, concern about  
16  
17 53 the cost, and absence of a doctor's recommendation [5, 7]. Home-based iFOBT has been  
18  
19 54 implemented in many high-income countries (HICs) to improve the accessibility and uptake of  
20  
21 55 CRC screening [8]. In this context, the Southeast Asia Community Observatory (SEACO) at  
22  
23 56 Monash University Malaysia and Queen's University Belfast (Northern Ireland) collaborated  
24  
25 57 to conduct the research project, 'Colorectal Cancer Screening Intervention for Malaysia'  
26  
27 58 (CRC-SIM) in 2020-2022. This project evaluated the implementation of a home-based CRC  
28  
29 59 screening pilot in Segamat District. The uptake of the novel screening programme was 22%.  
30  
31 60 The significantly higher uptake indicates the potential population wide impact if this screening  
32  
33 61 approach (i.e., using home-based iFOBT and self-reporting test results) was scaled up.  
34  
35 62 However, in order to aid public health decision making, there is a need to model a scaled-up  
36  
37 63 version of the research-tested screening programme and, more specifically, gather insights  
38  
39 64 about the total costs of programme implementation and how it might impact the MoHM budget.  
40  
41 65 In other words, there is a need for a budget impact analysis (BIA).  
42  
43 66  
44  
45  
46  
47  
48  
49  
50  
51 67 Budget impact analysis was first introduced in 1998 by Mauskopf [9, 10]. Since then, BIA is  
52  
53 68 gradually requested as a part of the health technology assessment (HTA) procedure by a few  
54  
55 69 countries around the world such as Australia, Canada, the United States (the US), England,  
56  
57 70 Ireland, Spain, Belgium, Poland, Israel, and Thailand [11]. Regarding BIA for colorectal cancer  
58  
59  
60

1  
2  
3 71 (CRC) screening, a recent systematic review found six studies conducted in the UK, US,  
4  
5 72 Belgium, and Australia [12]. We found two additional studies published in 2018 and 2019 from  
6  
7 73 Spain and Thailand, respectively [13, 14]. Although results from these studies are not  
8  
9 74 comparable as they were specific to each studied country, all studies were conducted to answer  
10  
11 75 the question ‘What is the budget impact of implementing a colorectal cancer  
12  
13 76 screening/prevention programme compared with current usual care’. It is also the research  
14  
15 77 question that the BIA in this study aims to answer. Specifically, the BIA assessed the expected  
16  
17 78 changes in the health expenditure of MoHM budget as a result of implementing a population-  
18  
19 79 based national CRC screening programme versus current opportunistic screening (or ‘usual  
20  
21 80 care’). It assessed the affordability of the screening programme given potential budget  
22  
23 81 constraints.  
24  
25  
26  
27  
28  
29  
30  
31

## 32 **METHODS**

33  
34 84 The conduct of this BIA and presentation of this paper followed the guidelines developed by  
35  
36 85 the International Society for Pharmacoeconomics and Outcomes Research (ISPOR) Task Force  
37  
38 86 [11, 15]. All costs are presented in local currency -the Malaysian Ringgit (RM)- and  
39  
40 87 International Dollar (I\$). RM was converted to I\$ using purchasing power parity (PPP)  
41  
42 88 conversion factors instead of market exchange rates. The PPP conversion rate of 1.441 was  
43  
44 89 obtained from the IMF World Economic Outlook Database [16].  
45  
46  
47  
48  
49  
50

### 51 **Health service under assessment and its comparator**

52  
53 92 The specific health service that was the focus of the BIA was a population-based screening  
54  
55 93 programme for colorectal cancer using a self-rapid response iFOBT. The comparator was  
56  
57 94 current or ‘usual care’ - opportunistic screening.  
58  
59  
60

1  
2  
3 96 The BIA is predicated on the opportunistic screening programme being replaced by the new  
4  
5 97 population-based screening programme (i.e., the two programmes would not be run in  
6  
7 98 conjunction or in other words, the two scenarios in assessment are mutually exclusive). In each  
8  
9  
10 99 scenario, the patient pathway from the point when patients were invited for screening to receipt  
11  
12 100 of a definitive diagnosis were identified and described. The screening procedure ends at the point  
13  
14 101 of a patient receiving their iFOBT result with encouragement to attend hospital for a colonoscopy  
15  
16 102 (if iFOBT is positive). It is important to note that the BIA included costs of screening and  
17  
18 103 diagnosis (e.g., colonoscopy, biopsy) but not treatment. The BIA also did not address issues with  
19  
20 104 respect to equity of access and uptake of services in either screening scenarios.  
21  
22  
23  
24  
25

26 106 The patient pathways for the 'usual care' practice and the novel CRC screening programme are  
27  
28 107 presented in Figure 1 and 2, respectively. In opportunistic screening practice, it is recommended  
29  
30 108 or expected that individuals who are aged 50-75 years will be screened for CRC symptoms  
31  
32 109 when they attend their local health clinic (for any health condition or problem). If they are  
33  
34 110 asymptomatic and have an average risk of having CRC (based on family history), they are  
35  
36 111 offered an iFOBT, followed by a colonoscopy if the iFOBT test was positive. If CRC is  
37  
38 112 detected following a colonoscopy, the result is conveyed to a patient along with an explanation  
39  
40 113 of the treatment plan or referral arrangement.  
41  
42  
43

44 114 (Figure 1 is about here)

46 115 Details of the home-based screening intervention in CRC-SIM were published elsewhere [17].  
47  
48 116 Briefly, in the novel CRC screening programme, individuals aged 50-75 years were contacted,  
49  
50 117 checked for eligibility, and invited to participate. A home-screening 'pack' was posted to eligible  
51  
52 118 participants followed by two reminders. The test was performed at home by participants who took  
53  
54 119 a photograph of the completed test and texted it to trained medical professionals who interpreted  
55  
56 120 the photograph. Participants with positive iFOBT were referred for a colonoscopy at hospital.  
57  
58  
59  
60



1  
2  
3 121 (Figure 2 is about here)  
4

5 122 There were two main differences between these patient pathways. Firstly, individuals within  
6  
7 123 the target age group for screening were contacted directly and invited to participate in the novel  
8  
9 124 CRC screening programme while in the situation of 'usual care', CRC screening was offered  
10  
11 125 (if screening guideline recommendations were followed) only when members of the target  
12  
13 126 group visited their clinic for some other health condition or problem. Secondly, the iFOBT was  
14  
15 127 performed by doctors at health clinics in the 'usual care' pathway while in the novel CRC  
16  
17 128 screening programme, participants self-tested in their home. Home-based testing generated  
18  
19 129 additional stages in the pathways in relation to sending a test, reminding participants, taking a  
20  
21 130 photo of a completed test, and sending it to programme officers and vice versa. The remaining  
22  
23 131 stages of each pathway (e.g., being screened for eligibility, receiving a colonoscopy, and  
24  
25 132 receiving a treatment plan) were the same across the two scenarios.  
26  
27  
28  
29  
30

31 133

### 32 33 134 **Eligible population and input assumptions**

34  
35 135 The target population for current opportunistic screening in Malaysia is individuals aged 50-  
36  
37 136 75 years, regardless of sex. Due to the nature of home-based screening, the target population  
38  
39 137 for the CRC screening programme was required to meet some additional inclusion criteria as  
40  
41 138 presented in Figure 2. The number of individuals who presented and completed each stage was  
42  
43 139 estimated using input assumptions.  
44  
45  
46

47 140

48  
49 141 Data about the population of Malaysia by age was taken from government reports (i.e.,  
50  
51 142 Department of Statistics, Malaysia) and from World Population Review [18, 19]. The total  
52  
53 143 population was reported to be 32,676,786 in 2021, of which, 19% or 6,228,195 were aged 50-  
54  
55 144 75 years old [18, 19].  
56  
57

58 145  
59  
60

1  
2  
3 146 **In the ‘usual care’ – opportunistic screening pathway or scenario**, all assumptions were  
4  
5 147 derived from a study by Tamin NSI (2020) which was a 5-year evaluation of opportunistic CRC  
6  
7 148 screening (and the use of stool-based tests) in community health clinics across Malaysia [5]. It  
8  
9  
10 149 was assumed that 0.482% of the eligible population would avail of CRC screening when they  
11  
12 150 attended local health clinics for other conditions; and 9.21% of this proportion of tested patients  
13  
14  
15 151 would receive a positive result. Only 55.9% of patients in the study by Tamin availed of a  
16  
17 152 colonoscopy after a positive iFOBT. CRC detection after colonoscopy investigation was 4.04%.  
18  
19 153

20  
21 154 **In the novel CRC screening programme**, all assumptions were derived from the CRC-SIM  
22  
23 155 research project. It was assumed that 50.51% of the eligible population would be contactable  
24  
25 156 and meet all inclusion criteria to participate in the home-based screening programme; 52.27%  
26  
27 157 of people who were eligible would agree to participate; 41.63% would perform the iFOBT and  
28  
29 158 send a photo of a completed test to the programme officers; 18.01% of people who would be  
30  
31 159 tested would receive a positive result; 41.07% would avail of colonoscopy after a positive  
32  
33 160 iFOBT result; and CRC detection after colonoscopy investigation would be 4.35%.  
34  
35 161

36  
37  
38 162 Table 1 summarises details about the input assumptions that were used to estimate the number  
39  
40 163 of individuals at each stage of the respective pathway: the opportunistic screening pathway and  
41  
42 164 the CRC screening programme pathway.  
43  
44  
45  
46  
47  
48  
49  
50  
51  
52  
53  
54  
55  
56  
57  
58  
59  
60

168 **Table 1: Input assumptions used to estimate the population at each stage of the patient**  
 169 **pathways**

| Stage in pathway                                                                                           | Opportunistic screening scenario<br>(Current practice) |                    | Population-based CRC programme screening scenario<br>(Proposed practice) |                    |
|------------------------------------------------------------------------------------------------------------|--------------------------------------------------------|--------------------|--------------------------------------------------------------------------|--------------------|
|                                                                                                            | Assumption*                                            | No. of individuals | Assumption**                                                             | No. of individuals |
| Total population (all ages)                                                                                | NA                                                     | 32,676,786         | NA                                                                       | 32,676,786         |
| Target population (aged 50-75)                                                                             | 19.06%                                                 | 6,228,195          | 19.06%                                                                   | 6,228,195          |
| Eligible population (met all inclusion criteria)                                                           | 100%                                                   | 6,228,195          | 50.51%                                                                   | 3,146,020          |
| Availed of/agreed to take CRC screening                                                                    | 0.482%                                                 | 30,020             | 52.27%                                                                   | 1,644,561          |
| Needed 1 <sup>st</sup> reminder to return the iFOBT result (among those agreed to participate)             | NA                                                     | NA                 | 78.71%                                                                   | 1,294,514          |
| Needed 2 <sup>nd</sup> reminder to return the iFOBT result (among those received 1 <sup>st</sup> reminder) | NA                                                     | NA                 | 88.10%                                                                   | 1,140,405          |
| Returned iFOBT result (among those agreed to participate)                                                  | 100%                                                   | 30,020             | 41.63%                                                                   | 684,683            |
| Received iFOBT positive result                                                                             | 9.21%                                                  | 2,765              | 18.01%                                                                   | 123,287            |
| Availed of colonoscopy after positive iFOBT                                                                | 55.9%                                                  | 1,546              | 41.07%                                                                   | 50,636             |
| CRC detection after colonoscopy investigation                                                              | 4.04%                                                  | 62                 | 4.35%                                                                    | 2,202              |

CRC: Colorectal cancer; iFOBT: Immunochemical faecal occult blood test; NA: Not applicable; No: Number  
 \* The assumptions were derived from a study of Tamin NSI (2020) which was a 5-year evaluation of using stool-based test for opportunistic CRC screening in primary health institutions across Malaysia [5].  
 \*\* The assumptions were derived from the Colorectal Cancer Screening Intervention for Malaysia (or CRC-SIM research project) in Segamat District, conducted by Queen's University Belfast, Monash University, and Southeast Asia Community Observatory (SEACO) in 2021.

170

171

1  
2  
3 172 **Cost input and data sources**  
4

5 173 In the opportunistic screening scenario, the total cost comprised the cost of:  
6

7 174 (i) performing screening (e.g., asking for symptoms, family history, and collecting the sample)  
8

9 175 (ii) processing stool specimens  
10

11 176 (iii) interpreting test results and  
12

13 177 (iv) conveying a definitive diagnosis to patients (include explaining treatment plan or referral  
14

15 178 arrangements)  
16

17 179  
18

19 180 In the CRC programme screening scenario, the total cost comprised the costs of:  
20

21 181 (i) contacting potential participants  
22

23 182 (ii) delivering iFOBT test kits (including cost of the test, postage, print materials, and sending  
24

25 183 video instruction)  
26

27 184 (iii) sending a reminder to participants (up to 2 times, by text message and phone call)  
28

29 185 (iv) interpreting and conveying results to participants and  
30

31 186 (v) following-up patients with positive iFOBT but did not take colonoscopy in order to  
32

33 187 encourage them to avail of the colonoscopy  
34

35 188  
36

37 189 These costs were calculated by multiplying the time allocated for the completion of each task  
38

39 190 with the salary cost of the person who undertakes each task plus cost of consumables. Table 2  
40

41 191 shows the unit cost for each cost element, related assumptions, and data sources.  
42

43 192  
44

45 193  
46  
47  
48  
49  
50  
51  
52  
53  
54  
55  
56  
57  
58  
59  
60

194 **Table 2: Resources and unit costs**

Currency: Malaysian ringgit (RM)

| Cost element                                                                                         | Unit cost<br>(Per screen)<br>RM (I\$) | Assumptions                                                 | Source |
|------------------------------------------------------------------------------------------------------|---------------------------------------|-------------------------------------------------------------|--------|
| <b>Current practice (opportunistic screening)</b>                                                    |                                       |                                                             |        |
| Performing screening (asking for symptoms, family history, referral) and taking sample               | 5.58                                  | 20 min x salary RM2947/month                                | 1      |
| Processing stool specimens                                                                           | 1.70                                  | 10 min x salary RM1797/month                                | 2      |
| Interpreting the test results                                                                        | 2.79                                  | 10 min x salary RM2947/month                                | 1      |
| Conveying a definitive diagnosis to patients (along with explaining treatment plan or referral etc.) | 8.37                                  | 30 min x salary RM2947/month                                | 1      |
| <b>Proposed practice (Population-based CRC screening programme)</b>                                  |                                       |                                                             |        |
| Contact eligible individuals - agreed to participate                                                 | 0.98                                  | 7.1 min x (salary RM1440/month + mobile package RM20/month) | 3      |
| Contact eligible individuals - rejected/excluded to participate                                      | 0.47                                  | 3.4 min x (same as above)                                   | 3      |
| iFOBT rapid test kit                                                                                 | 6.90                                  |                                                             | 3      |
| Print materials (instruction leaflet, explanatory statement)                                         | 1.10                                  | 90 cents for colour print + 20 cent for black & white print | 3      |
| Postage (stamps, etc.)                                                                               | 5.35                                  |                                                             | 3      |
| Sending video through WhatsApp                                                                       | 0.41                                  | 3 min x (salary RM1440/month + mobile package RM20/month)   | 3      |
| Sending reminder text message                                                                        | 0.41                                  | 3 min x (same as above)                                     | 3      |
| Reminder call                                                                                        | 0.28                                  | 2 min x (same as above)                                     | 3      |
| Interpreting the test kit result                                                                     | 1.70                                  | 10 min x salary RM1797/month                                | 3      |
| Sending text message to inform patient of negative result                                            | 0.45                                  | 2 min x (salary RM2350/month + mobile package RM20/month)   | 3      |
| Calling patient to inform him/her of positive result                                                 | 0.67                                  | 3 min x (same as above)                                     | 3      |
| Preparing and sending referral letter to patient/clinic                                              | 1.12                                  | 5 min x (same as above)                                     | 3      |
| Follow up effort                                                                                     | 6.73                                  | 30 min x (same as above)                                    | 3      |
| Developing communication materials, <b>one-off cost</b>                                              | 6,063                                 | Communication materials do not change in 5 years            | 3      |

Currency: Malaysian ringgit (RM)

| Cost element                                                                                                                                                                                                                      | Unit cost<br>(Per screen)<br>RM (I\$) | Assumptions                                                                                                                                                                                                                                            | Source |
|-----------------------------------------------------------------------------------------------------------------------------------------------------------------------------------------------------------------------------------|---------------------------------------|--------------------------------------------------------------------------------------------------------------------------------------------------------------------------------------------------------------------------------------------------------|--------|
| Training for data collectors*, <b>one-off cost</b><br><i>* Data collectors are those employed by the programme to (i) contact potential participants, (ii) deliver iFOBT test kits, and (iii) send a reminder to participants</i> | 109,703                               | + 1 day training (virtual using Zoom)<br>+ 1 trainer for maximum 25 trainees<br>+ 1 data collector* is needed for every target population of 400<br>+ Cost=1-day-salary of trainer/trainees x number of trainer/trainees<br>+ No retraining in 5 years | 3      |
| <b>Same in both scenarios/practices</b>                                                                                                                                                                                           |                                       |                                                                                                                                                                                                                                                        |        |
| Colonoscopy (including polyps removal and/or biopsy if needed)                                                                                                                                                                    | 200                                   |                                                                                                                                                                                                                                                        |        |
| Consumables – stool container, gloves, mask, plastic waste bag and disposal of materials from the test                                                                                                                            | 10.80                                 | RM8636.7/800 sets                                                                                                                                                                                                                                      | 3      |

*iFOBT: Immunochemical faecal occult blood test; RM: Malaysian ringgit*

Source:

1. Public Services Commission of Malaysia. Medical Officer Grade UD41. Accessed at <https://www.spa.gov.my/spa/laman-utama/gaji-syarat-lantikan-deskripsi-tugas/ijazah-sarjana-phd/pegawai-perubatan-gred-ud41>
2. Public Services Commission of Malaysia. Medical laboratory technologist Grade U29. Accessed at [https://www.interactive.jpa.gov.my/ezskim/klasifikasi/perbekalanskim.asp?id\\_skim=3LU03](https://www.interactive.jpa.gov.my/ezskim/klasifikasi/perbekalanskim.asp?id_skim=3LU03)
3. Colorectal Cancer Screening Intervention for Malaysia (or CRC-SIM research project) in Segamat District, conducted by Queen's University Belfast, Monash University, and Southeast Asia Community Observatory (SEACO) in 2021

195

196 In the current practice of opportunistic screening, doctors were consulted about the estimated

197 time to perform each stage in the pathway. The monthly salary of a general doctor and a medical

198 laboratory technologist was based on the rate published by the Public Services Commission of

199 Malaysia [20, 21]. These rates were RM2,947 (~I\$2,045) and RM1,797 (~I\$1,247), respectively.

200 In the novel CRC screening programme, the time to perform each stage in the pathway, salary

201 of personnel, and costs of material resources (e.g., rapid kit test, consumables, postage, printing

202 materials) were based on the time and expenditure observed in the CRC-SIM research project.

203 All costs were calculated per screen except the cost of training and the cost of developing

204 communication materials which were one-off costs based on the assumption that

205 communication materials would not change, and no re-training would be needed within 5 years.

1  
2  
3 206 It was assumed (based on the experience of operating the screening programme during the  
4  
5 207 CRC-SIM project) that one data collector (i.e., those employed by the programme to (i) contact  
6  
7 208 potential participants, (ii) deliver iFOBT test kits, and (iii) send a reminder to participants)  
8  
9  
10 209 would be needed for every 400 people in the target population. Training would last one day  
11  
12 210 and would be delivered virtually; thus, the cost of training equalled (1-day-salary of trainer x  
13  
14 211 number of trainer) + (1-day-salary of trainees x number of trainees/data collectors).  
15  
16  
17 212

### 19 213 **Perspective and time horizon**

21 214 The BIA was conducted from the viewpoint of the federal government which finances  
22  
23 215 Malaysia's public health system [22]. Only those costs and resource requirements relevant to  
24  
25 216 the budget holder were included in the analysis. For example, the out-of-pocket expenditure  
26  
27 217 incurred by patients were excluded.  
28  
29  
30 218

31  
32  
33 219 The analysis estimated the annual financial impact over a period of five years as recommended  
34  
35 220 in the guidelines [11, 23]. Costs were not discounted given that the BIA methodology reports  
36  
37 221 the costs for each year in which they occur rather than a net present value [11].  
38  
39  
40 222

### 42 223 **Budget impact analyses**

#### 44 224 *Computing framework and base-case analysis*

46 225 The BIA used a cost calculator programmed in Microsoft Excel, following the costing  
47  
48 226 template<sup>1</sup> produced by the National Institute for Health and Care Excellence in the UK (NICE).  
49  
50 227 The template was modified to fit the programme under assessment. The cost calculator  
51  
52  
53  
54  
55  
56  
57

---

58  
59  
60 <sup>1</sup> The template can be freely downloaded at <https://www.nice.org.uk/Media/Default/About/what-we-do/our-programmes/evidence-standards-framework/budget-impact-template.xlsx>

228 approach is recommended by guidelines as it is easy for stakeholders to understand and  
229 replicate the results [11].

230  
231 First, the number of individuals who completed each stage was estimated (Table 1). The  
232 resources that were used at each stage of the respective pathways (in opportunistic screening  
233 and the novel CRC screening programme) were listed along with their unit costs (i.e., cost of  
234 each resource per person) (Table 2). Unit costs were multiplied by number of users to give the  
235 total cost of resources for each scenario. The net budget impact was calculated as the difference  
236 in cost between opportunistic screening and the CRC screening programme. Visual depiction  
237 of the cost calculator is shown in Supplementary Material, Figure S1.

238

### 239 *Uncertainty and scenario analyses*

240 The input assumptions (that were used to estimate the number of individuals at each stage of  
241 the respective pathway) and the cost inputs were varied, and then the impact of these changes  
242 in relation to the results was analysed to investigate the sensitivity of the budget impact results  
243 to variations in individual input. As recommended by Gray et al. (2011), the range of variation  
244 regarding parameters for which data sources about dispersion were unavailable were  $\pm 20\%$  of  
245 the base case [24].

246

### 247 **Patient and public involvement**

248 It was not appropriate or possible to involve patients or the public in the design, or conduct, or  
249 reporting, or dissemination plans of our research as this type of study is a secondary analysis  
250 of data from a payer perspective (Ministry of Health Malaysia).

251



## 252 RESULTS

### 253 Base-case analysis

254 The total annual cost of the current practice of opportunistic screening is RM1,584,321  
255 (~I\$1,099,460), of which 80% (RM1,274,690 ~ I\$884,587) was for providing opportunistic  
256 CRC to adults who availed of the service. Costs of providing colonoscopy (including polyps  
257 removal and/or biopsy if needed) after receipt of a positive iFOBT and conveying definitive  
258 diagnosis to patients (along with explaining treatment plan or referral etc.) after the outcome  
259 of the colonoscopy were RM309,108 (~I\$214,509) and RM523 (~I\$363), respectively.

260

261 The total annual cost over a 5-year period of the proposed practice (i.e., CRC screening  
262 programme) is shown in Table 3. It was assumed that the number of people who would agree  
263 to participate in the programme would increase by 5% each year (in consideration of health  
264 promotion activities as well as information flows including word of mouth between  
265 participants). Therefore, the financial impact would also increase accordingly.

266

267

268 **Table 3: Annual cost of proposed practice (i.e., CRC screening programme)**

| <i>Currency: Malaysian ringgit (RM) and International Dollar (I\$)</i>                                                        |                                           |                                           |                                           |                                           |                                            |
|-------------------------------------------------------------------------------------------------------------------------------|-------------------------------------------|-------------------------------------------|-------------------------------------------|-------------------------------------------|--------------------------------------------|
| <b>Proposed practice</b>                                                                                                      | <b>Year 1<br/>RM (I\$)</b>                | <b>Year 2<br/>RM (I\$)</b>                | <b>Year 3<br/>RM (I\$)</b>                | <b>Year 4<br/>RM (I\$)</b>                | <b>Year 5<br/>RM (I\$)</b>                 |
| Contacting adults who are eligible for CRC screening programme (i.e., aged 50-75) and screen for eligibility of participating | 2,320,148<br><i>(1,610,096)</i>           | 2,320,148<br><i>(1,610,096)</i>           | 2,320,148<br><i>(1,610,096)</i>           | 2,320,148<br><i>(1,610,096)</i>           | 2,320,148<br><i>(1,610,096)</i>            |
| Providing iFOBT test to adults who agreed to participate in CRC screening programme after being invited                       | 93,654,886<br><i>(64,992,981)</i>         | 102,612,907<br><i>(71,209,512)</i>        | 111,570,928<br><i>(77,426,043)</i>        | 120,528,949<br><i>(83,642,574)</i>        | 129,486,970<br><i>(89,859,105)</i>         |
| Providing 1 <sup>st</sup> reminder to participants                                                                            | 536,929<br><i>(372,609)</i>               | 588,286<br><i>(408,248)</i>               | 639,643<br><i>(443,888)</i>               | 690,999<br><i>(479,527)</i>               | 742,356<br><i>(515,167)</i>                |
| Providing 2 <sup>nd</sup> reminder to participants                                                                            | 315,339<br><i>(218,833)</i>               | 345,501<br><i>(239,765)</i>               | 375,663<br><i>(260,696)</i>               | 405,825<br><i>(281,627)</i>               | 435,987<br><i>(302,559)</i>                |
| Interpreting returned iFOBT samples                                                                                           | 1,165,129<br><i>(808,556)</i>             | 1,276,572<br><i>(885,893)</i>             | 1,388,016<br><i>(963,231)</i>             | 1,499,460<br><i>(1,040,569)</i>           | 1,610,903<br><i>(1,117,906)</i>            |
| Conveying result through message to participants with iFOBT negative result                                                   | 251,990<br><i>(174,872)</i>               | 276,093<br><i>(191,598)</i>               | 300,196<br><i>(208,324)</i>               | 324,298<br><i>(225,050)</i>               | 348,401<br><i>(241,777)</i>                |
| Preparing and sending referral letter and calling participants with iFOBT POSITIVE result                                     | 221,356<br><i>(153,613)</i>               | 242,529<br><i>(168,306)</i>               | 263,701<br><i>(182,999)</i>               | 284,874<br><i>(197,692)</i>               | 306,046<br><i>(212,384)</i>                |
| Following up participants who DID NOT take colonoscopy after positive iFOBT                                                   | 489,158<br><i>(339,457)</i>               | 535,945<br><i>(371,926)</i>               | 582,733<br><i>(404,394)</i>               | 629,520<br><i>(436,863)</i>               | 676,308<br><i>(469,332)</i>                |
| Providing colonoscopy (including polyps removal and/or biopsy if needed) to participants with positive iFOBT                  | 10,127,147<br><i>(7,027,861)</i>          | 11,095,801<br><i>(7,700,070)</i>          | 12,064,455<br><i>(8,372,280)</i>          | 13,033,109<br><i>(9,044,489)</i>          | 14,001,764<br><i>(9,716,700)</i>           |
| Conveying definitive diagnosis to patients (along with explaining treatment plan or referral etc.) after the colonoscopy      | 18,432<br><i>(12,791)</i>                 | 20,195<br><i>(14,015)</i>                 | 21,958<br><i>(15,238)</i>                 | 23,721<br><i>(16,461)</i>                 | 25,484<br><i>(17,685)</i>                  |
| Capital costs (Developing communication materials + Training for data collectors)                                             | 115,766<br><i>(80,337)</i>                | 115,766<br><i>(80,337)</i>                | 115,766<br><i>(80,337)</i>                | 115,766<br><i>(80,337)</i>                | 115,766<br><i>(80,337)</i>                 |
| <b>Total cost of proposed practice</b>                                                                                        | <b>109,216,279</b><br><i>(75,792,005)</i> | <b>119,429,743</b><br><i>(82,879,766)</i> | <b>129,643,206</b><br><i>(89,967,527)</i> | <b>139,856,670</b><br><i>(97,055,288)</i> | <b>150,070,133</b><br><i>(104,143,049)</i> |
| <i>CRC: Colorectal cancer; iFOBT: Immunochemical faecal occult blood test</i>                                                 |                                           |                                           |                                           |                                           |                                            |

1  
2  
3 269  
4  
5 270 Similar to opportunistic screening, the cost to provide iFOBT to the eligible population who availed  
6  
7 271 of the service accounted for 86% of the total cost of the proposed CRC screening programme. The  
8  
9 272 second most costly component was the provision of colonoscopy (including polyps removal and/or  
10  
11 273 biopsy if needed) to patients with an iFOBT positive result, at 9% of the total cost. The remaining  
12  
13 274 nine cost components such as contacting potential participants, reminding participants to send  
14  
15 275 photograph of iFOBT result, conveying diagnosis to participants and the follow-up effort added  
16  
17 276 only up to 5% of the total cost.  
18  
19  
20  
21 277

22  
23 278 The net budget impact in the 1<sup>st</sup> year of implementing CRC screening programme would be  
24  
25 279 RM107,631,959 (~I\$74,692,546 which equalled the total cost of future practice minus the total  
26  
27 280 cost of current practice). The impact increases each year as the number of people who agree to  
28  
29 281 participate in the programme increase, reaching RM117,845,422 (~I\$81,780,307) in year 2,  
30  
31 282 RM128,058,885 (~I\$88,868,067) in year 3, RM138,272,349 (~I\$ 95,955,829) in year 4, and  
32  
33 283 RM148,485,812 (~I\$103,043,589) in year 5.  
34  
35  
36  
37 284

38  
39 285 The net budget impact of providing and delivering the CRC screening programme over the 5-year  
40  
41 286 timeframe for each state in Malaysia (calculated according to the population size of each state) can  
42  
43 287 be accessed in Supplementary Material, Table S1. These estimates aid service planning decisions  
44  
45 288 if the novel pilot programme is implemented in one or more of these states before being scaled up  
46  
47 289 into nationwide programme.  
48  
49  
50

51 290

### 52 53 291 **Uncertainty and scenario analyses**

54  
55 292 The tornado diagram in Figure 3 shows the change to net budget impact when assumptions and  
56  
57 293 cost inputs were varied. It presents the results of multiple univariate sensitive analyses on key  
58  
59  
60

1  
2  
3 294 inputs that exert the most influence on the net budget impact (See Table S2, Supplementary  
4  
5 295 Material for results of multiple univariate sensitive analysis on all inputs). These inputs include  
6  
7  
8 296 the probability of (i) making successful contact with adults about the CRC screening programme,  
9  
10 297 (ii) adults agreeing to participate, (iii) adults being eligible to participate in the programme, and  
11  
12 298 (iv) the cost of consumables that are required to take a stool sample. The first three inputs  
13  
14 299 influence the number of individuals who are present at each stage of the patient pathway.

15  
16  
17 300 (Figure 3 is about here)

18  
19 301 The net budget impact would increase from RM107 million to RM130 million (~I\$74-90  
20  
21 302 million) if there was a 20% increase in (i) the probability of adults who were contactable (from  
22  
23 303 a contact list of people aged 50-75 years old) or (ii) the probability of adults agreeing to  
24  
25 304 participate in the CRC screening programme or (iii) the probability of adults being eligible for  
26  
27 305 the programme (i.e., aged 50-75 years old; having no symptoms of CRC, a smartphone, and  
28  
29 306 WhatsApp; resident within programme area; and did not have colonoscopy this year). In other  
30  
31 307 words, a 20% increase in each one of these factors would require an additional RM23 million  
32  
33 308 (~I\$16 million) to be budgeted for the programme. Likewise, a 20% increase in the cost of the  
34  
35 309 consumables that are required for taking stool samples would mean that the programme would  
36  
37 310 cost RM15 million (~I\$10 million) more than the originally calculated total cost.  
38  
39  
40  
41  
42  
43  
44

## 45 312 **DISCUSSION**

46  
47  
48 313 The result of this analysis provides information to guide public health service planners and  
49  
50 314 commissioners in their decisions about an alternative CRC screening strategy i.e., a population-  
51  
52 315 based CRC screening programme using home-based iFOBT compared to current opportunistic  
53  
54 316 screening. It concluded that the net budget impact in the 1<sup>st</sup> year of implementing a CRC  
55  
56 317 screening programme of this kind would be RM107,631,959 (~I\$74,692,546). The impact  
57  
58 318 would increase by year due to increase in uptake and would reach RM148,485,812  
59  
60

1  
2  
3 319 (~I\$103,043,589) in the 5<sup>th</sup> year of implementation. This analytical approach and the results of  
4  
5 320 this analysis are presented as aids to better decision making by MoHs and stakeholders in  
6  
7 321 lower-middle-income countries (LMICs) about health programme planning and in this  
8  
9 322 particular illustrative case to the MoHM regarding the degree to which the proposed CRC  
10  
11 323 screening programme is affordable.  
12  
13  
14  
15 324

16  
17 325 The total budget that was allocated to the MoHM in 2022 was RM32.4 billion (~I\$22.5 million)  
18  
19 326 [25]. Spending on prevention and public health services in 2009 was reported to be RM1.6  
20  
21 327 billion (~I\$1.1 million) [22]. More recent data and information about the size of the budget that  
22  
23 328 is allocated to cancer screening is not available. As such, it is estimated that the net budget  
24  
25 329 impact of implementing a CRC screening programme would account for between 7-10% of the  
26  
27 330 total budget for prevention and public health services. This represents a significant proportion  
28  
29 331 of the overall budget allocated for prevention programmes/interventions.  
30  
31  
32

33 332  
34  
35 333 The key factor in the implementation of a population-based screening programme/service or the  
36  
37 334 factor that has biggest impact on the budget is the size of the population who use the service. The  
38  
39 335 degree of accuracy regarding population size estimates is related closely to the cost estimates in  
40  
41 336 the budget. It is important for service planners to keep this point in mind and to take into account  
42  
43 337 an increase in uptake and the impact of such an increase. Therefore, in the case of the CRC  
44  
45 338 programme presented here, we assumed a 5% increase annually in uptake and calculated the net  
46  
47 339 budget impact. The net budget impact can be recalculated according to the actual change in uptake  
48  
49 340 after the programme is implemented.  
50  
51  
52

53 341  
54  
55 342 Budget impact analysis is an economic assessment that is used to estimate the changes in  
56  
57 343 expenditure of a specific budget holder if a new health technology/programme is implemented  
58  
59  
60

1  
2  
3 344 [11]. As such, BIA complements other health economic evaluation methods such as cost-  
4  
5 345 effectiveness analysis (CEA) to provide a comprehensive economic assessment of a health care  
6  
7 346 intervention to decision makers [11]. A BIA aids decision making by health service planners  
8  
9  
10 347 and commissioners about whether an intervention or programme is affordable within given  
11  
12 348 budget constraints while a CEA informs decisions about whether an intervention is good value  
13  
14 349 for money [11, 26]. BIA and its pragmatic approach is an ideal method when a situation calls  
15  
16  
17 350 for an evaluation of 'affordability' which is of central importance in LMICs and, arguably, is  
18  
19 351 the key concern of whoever is in charge of managing a health care budget [27, 28].  
20  
21  
22 352

23  
24 353 It could well be that savings in earlier treatment would counterbalance the additional budget  
25  
26 354 impact. Likewise, reduction in travel and time costs of participant while using home-based  
27  
28 355 screening would reduce the total costs of the screening programme from a societal perspective.  
29  
30 356 If we assume that travel distance to a clinic is 10km (77% of Malaysian live within 5km of a  
31  
32 357 clinic [29]), travel time is 10 minutes (travel speed = 60km/hour), opportunistic screening takes  
33  
34 358 40 minutes (Table 2), and performing iFOBT at home take 10 minutes, the reduction in travel  
35  
36 359 and time costs will be 40 minutes. This can be monetised using Gross Domestic Product per  
37  
38 360 capita at RM50,224 [30] to which is then added 10km x RM1 per km (i.e., tolls & fuel [31]) =  
39  
40 361 RM14 per participant. Consistent with BIA best practice guidance these have not been included  
41  
42 362 in our estimate of the BIA which focuses on costs to the provider. Further work in this area  
43  
44 363 may though be useful or a health technology assessment given the potential for aspects of  
45  
46 364 societal cost to influence cost-effectiveness and service uptake.  
47  
48  
49  
50

51 365  
52  
53 366 Finally, the conduct of BIA in this paper has some limitations. First, assumptions and cost  
54  
55 367 inputs for the CRC screening programme were based on the costs and rates that were observed  
56  
57 368 in the CRC-SIM research project. Due to unavailability of data about dispersion of the  
58  
59  
60

1  
2  
3 369 parameters, the used range of variation ( $\pm 20\%$  of the base case) may overestimate the  
4  
5 370 uncertainty and suggests that the next step for further research is a CEA where parameter  
6  
7 371 uncertainty is investigated with actual data. The project was conducted in only one district  
8  
9 372 (Segamat); and the distribution of three main ethnic groups (i.e., Malay, Chinese, Indian) in  
10  
11 373 the project differed from the proportions that have been reported nation-wide (72%:24%:3%  
12  
13 374 vs 62%:21%:6%, respectively). Therefore, it is important to be mindful of the possibility that  
14  
15 375 the assumptions and inputs (based on the project) may not be representative for, or read across  
16  
17 376 to, the whole population of Malaysia. Likewise, it is important to bear in mind that our findings  
18  
19 377 do not include the perspective of other payers and may not generalise to other settings. The  
20  
21 378 results are related directly to the context of the Malaysian health system and the epidemiology  
22  
23 379 of CRC in the country though they are illustrative of the positive contribution of the BIA  
24  
25 380 methodology and approach.  
26  
27  
28  
29  
30  
31  
32  
33

## 34 382 **CONCLUSIONS**

35  
36  
37 383 This study employed a BIA methodology to analyse the costs of a novel CRC screening  
38  
39 384 programme using home-based iFOBT and mHealth versus the current opportunistic screening.  
40  
41 385 The findings estimated the net budget impact of implementing a population-based national  
42  
43 386 CRC screening programme in Malaysia. The modelling estimations are important  
44  
45 387 considerations for health authorities when they are required to decide the affordability of  
46  
47 388 implementing a programme and to aid budgetary planning as well as decision making,  
48  
49 389 generally, about implementation. Our study illustrates the use and value of the BIA approach  
50  
51 390 in LMICs and resource-constrained settings.  
52  
53  
54  
55  
56  
57  
58  
59  
60

391

## 392 Abbreviations

|    |         |                                                                     |
|----|---------|---------------------------------------------------------------------|
| 6  | BIA     | Budget impact analysis                                              |
| 8  | CEA     | Cost-effectiveness analysis                                         |
| 10 | CRC     | Colorectal cancer                                                   |
| 13 | CRC-SIM | Colorectal Cancer Screening Intervention for Malaysia               |
| 15 | iFOBT   | Immunochemical faecal occult blood test                             |
| 17 | I\$     | International Dollar                                                |
| 20 | ISPOR   | The Professional Society for Health Economics and Outcomes Research |
| 22 | MoHM    | Ministry of Health of Malaysia                                      |
| 24 | NICE    | National Institute for Health and Care Excellence                   |
| 26 | RM      | Malaysian ringgit                                                   |
| 29 | SEACO   | Southeast Asia Community Observatory                                |
| 31 | UK      | The United Kingdom                                                  |

393

## 394 DECLARATIONS

395 **Research ethics approval.** Not applicable (This study does not involve human participants).

396 **Funding.** This research was supported by the Medical Research Council (UK) Global  
397 Challenges Research Fund (MR/S014349/1) and the National Medical Research Register  
398 Malaysia (NMRR ID-21-02045-O7G). The funder of the study had no role in study design,  
399 data collection, data analysis, data interpretation, or writing of the report.

400 **Competing interests.** The authors have no conflicts of interest to declare that are relevant to  
401 the content of this article.

402 **Availability of data and material.** All data generated or analysed during this study are  
403 included in this published article.



1  
2  
3 404 **Authors' contributions.** TTN: Methodology, Formal Analysis, Writing – Original draft, Writing –  
4  
5 405 Review & Editing. KR, MRS, and DS: Data Curation, Investigation, Writing – Review & Editing. ST:  
6  
7 406 Resources, Writing – Review & Editing. TTS, and MD: Conceptualization, Funding acquisition,  
8  
9 407 Writing – Review & Editing, Supervision. CON: Methodology, Formal Analysis, Writing – Review &  
10  
11 408 Editing, Supervision.

## 15 409 REFERENCE

- 18 410 1. Global Cancer Observatory: Cancer Today [Internet]. International Agency for  
19 411 Research on Cancer. 2020 [cited 12 April 2021]. Available from: <http://gco.iarc.fr/today>.  
20 412 2. Malaysian National Cancer Registry Report 2012-2016 [Internet]. Ministry of Health  
21 413 Malaysia. 2020 [cited April 12, 2022].  
22 414 3. Veettil SK, Lim KG, Chaiyakunapruk N, Ching SM, Abu Hassan MR. Colorectal  
23 415 cancer in Malaysia: Its burden and implications for a multiethnic country. *Asian Journal of*  
24 416 *Surgery*. 2017;40(6):481-9.  
25 417 4. Rawla P, Sunkara T, Barsouk A. Epidemiology of colorectal cancer: incidence,  
26 418 mortality, survival, and risk factors. *Prz Gastroenterol*. 2019;14(2):89-103.  
27 419 5. Tamin NSI, Razalli KA, Sallahuddin SN, Chan HK, Hassan MRA. A 5-year evaluation  
28 420 of using stool-based test for opportunistic colorectal cancer screening in primary health  
29 421 institutions across Malaysia. *Cancer epidemiology*. 2020;69:101829.  
30 422 6. Ministry of Health Malaysia. Clinical Practice Guidelines – Management of Colorectal  
31 423 Carcinoma. Putrajaya: Malaysia Health Technology Assessment Section (MaHTAS); 2017.  
32 424 7. Schliemann D, Ramanathan K, Ibrahim Tamin NSB, Neill C, Cardwell CR, Ismail R,  
33 425 et al. Implementation of a colorectal cancer screening intervention in Malaysia (CRC-SIM) in  
34 426 the context of a pandemic: study protocol. *BMJ Open*. 2022;12(9):e058420.  
35 427 8. Issa IA, Nouredine M. Colorectal cancer screening: An updated review of the  
36 428 available options. *World journal of gastroenterology*. 2017;23(28):5086-96.  
37 429 9. Mauskopf J. Prevalence-Based Economic Evaluation. *Value in Health*. 1998;1(4):251-  
38 430 9.  
39 431 10. Trueman P, Drummond M, Hutton J. Developing guidance for budget impact analysis.  
40 432 *Pharmacoeconomics*. 2001;19(6):609-21.  
41 433 11. Sullivan SD, Mauskopf JA, Augustovski F, Jaime Caro J, Lee KM, Minchin M, et al.  
42 434 Budget impact analysis-principles of good practice: report of the ISPOR 2012 Budget Impact  
43 435 Analysis Good Practice II Task Force. *Value Health*. 2014;17(1):5-14.  
44 436 12. Jahn B, Todorovic J, Bundo M, Sroczynski G, Conrads-Frank A, Rochau U, et al.  
45 437 Budget Impact Analysis of Cancer Screening: A Methodological Review. *Appl Health Econ*  
46 438 *Health Policy*. 2019;17(4):493-511.  
47 439 13. Arrospide A, Idigoras I, Mar J, de Koning H, van der Meulen M, Soto-Gordoa M, et al.  
48 440 Cost-effectiveness and budget impact analyses of a colorectal cancer screening programme in  
49 441 a high adenoma prevalence scenario using MISCAN-Colon microsimulation model. *BMC*  
50 442 *Cancer*. 2018;18(1):464.  
51 443 14. Phisalprapa P, Supakankunti S, Chaiyakunapruk N. Cost-effectiveness and budget  
52 444 impact analyses of colorectal cancer screenings in a low- and middle-income country: example  
53 445 from Thailand. *Journal of medical economics*. 2019;22(12):1351-61.

- 1  
2  
3 446 15. Mauskopf JA, Sullivan SD, Annemans L, Caro J, Mullins CD, Nuijten M, et al.  
4 447 Principles of good practice for budget impact analysis: report of the ISPOR Task Force on good  
5 448 research practices--budget impact analysis. *Value Health*. 2007;10(5):336-47.
- 6 449 16. World Economic Outlook Databases [Internet]. 2022 [cited April 13]. Available from:  
7 450 [https://www.imf.org/en/Publications/SPROLLS/world-economic-outlook-](https://www.imf.org/en/Publications/SPROLLS/world-economic-outlook-databases#sort=%40imfdate%20descending)  
8 451 [databases#sort=%40imfdate%20descending](https://www.imf.org/en/Publications/SPROLLS/world-economic-outlook-databases#sort=%40imfdate%20descending).
- 9 452 17. Budget impact analysis of a population-based screening programme for colorectal  
10 453 cancer in Malaysia: technical report of a modelling study [Internet]. Centre for Public Health,  
11 454 Queen's University Belfast. 2022 [cited July 1]. Available from:  
12 455 [https://pure.qub.ac.uk/en/publications/budget-impact-analysis-of-a-population-based-](https://pure.qub.ac.uk/en/publications/budget-impact-analysis-of-a-population-based-screening-programme-)  
13 456 [screening-programme-](https://pure.qub.ac.uk/en/publications/budget-impact-analysis-of-a-population-based-screening-programme-).
- 14 457 18. Malaysia Population Pyramid 2022 [Internet]. World Population Review. [cited Jan  
15 458 21, 2022]. Available from: <https://worldpopulationreview.com/countries/malaysia-population>.
- 16 459 19. Demographic Statistics Factsheet [Internet]. Department Statistics of Malaysia. 2021  
17 460 [cited Jan 21, 2022]. Available from:  
18 461 [https://www.dosm.gov.my/v1/index.php?r=column/cthemByCat&cat=430&bul\\_id=N05ydD](https://www.dosm.gov.my/v1/index.php?r=column/cthemByCat&cat=430&bul_id=N05ydD)  
19 462 [RXR1BJWVITdDY4TldHd253dz09&menu\\_id=L0pheU43NWJwRWVVSZklWdzQ4TlhUUT](https://www.dosm.gov.my/v1/index.php?r=column/cthemByCat&cat=430&bul_id=N05ydD)  
20 463 [09](https://www.dosm.gov.my/v1/index.php?r=column/cthemByCat&cat=430&bul_id=N05ydD).
- 21 464 20. Medical Officer Grade UD41 [Internet]. Public Services Commission of Malaysia.  
22 465 [cited January 27, 2022]. Available from: [https://www.spa.gov.my/spa/laman-utama/gaji-](https://www.spa.gov.my/spa/laman-utama/gaji-syarat-lantikan-deskripsi-tugas/ijazah-sarjana-phd/pegawai-perubatan-gred-ud41)  
23 466 [syarat-lantikan-deskripsi-tugas/ijazah-sarjana-phd/pegawai-perubatan-gred-ud41](https://www.spa.gov.my/spa/laman-utama/gaji-syarat-lantikan-deskripsi-tugas/ijazah-sarjana-phd/pegawai-perubatan-gred-ud41).
- 24 467 21. Medical laboratory technologist Grade U29 [Internet]. Public Services Commission of  
25 468 Malaysia. [cited January 27, 2022]. Available from:  
26 469 [https://www.interactive.jpa.gov.my/ezskim/klasifikasi/perbekalanskim.asp?id\\_skim=3LU03](https://www.interactive.jpa.gov.my/ezskim/klasifikasi/perbekalanskim.asp?id_skim=3LU03).
- 27 470 22. Jaafar S, Noh KM, Muttalib KA, Othman NH, Healy J. Malaysia Health System  
28 471 Review. Asia Pacific Observatory on Health Systems and Policies; 2013.
- 29 472 23. Health Information and Quality Authority. Guidelines for the budget impact analysis of  
30 473 health technologies in Ireland. 2018.
- 31 474 24. M.Gray A, Clarke PM, Wolstenholme JL, Wordsworth S. Applied Methods of Cost-  
32 475 effectiveness Analysis in Health Care. Gray AM, Briggs A, editors. New York: Oxford  
33 476 University Press; 2011.
- 34 477 25. Ministry of Finance Malaysia. Budget 2022: RM32.4 billion allocation for MOH.  
35 478 Official Portal of Ministry of Finance Malaysia. 2021 [cited 2022 April 13]. Available from:  
36 479 [https://www.mof.gov.my/portal/en/news/press-citations/budget-2022-rm32-4-billion-](https://www.mof.gov.my/portal/en/news/press-citations/budget-2022-rm32-4-billion-allocation-for-moh)  
37 480 [allocation-for-moh](https://www.mof.gov.my/portal/en/news/press-citations/budget-2022-rm32-4-billion-allocation-for-moh).
- 38 481 26. Leelahavarong P. Budget Impact Analysis. *J Med Assoc Thai*. 2014;97(Suppl. 5):S65-  
39 482 S71.
- 40 483 27. Orlewska E, Gulácsi L. Budget-Impact Analyses: A Critical Review of Published  
41 484 Studies. *PharmacoEconomics*. 2009;27(10):807-27.
- 42 485 28. Garattini L, van de Vooren K. Budget impact analysis in economic evaluation: a  
43 486 proposal for a clearer definition. *The European Journal of Health Economics*. 2011;12(6):499.
- 44 487 29. Risso-Gill I, Balabanova D, Majid F, Ng KK, Yusoff K, Mustapha F, et al.  
45 488 Understanding the modifiable health systems barriers to hypertension management in  
46 489 Malaysia: a multi-method health systems appraisal approach. *BMC Health Services Research*.  
47 490 2015;15(1):254.
- 48 491 30. World Bank Open Data: GDP per capita [Internet]. World Bank. 2021 [cited March 9,  
49 492 2023]. Available from: <https://data.worldbank.org/indicator/NY.GDP.PCAP.CD>.
- 50 493 31. Malaysia Toll Calculator – Google Maps with Tolls & Fuel [Internet]. TollGuru. 2023  
51 494 [cited March 9, 2023]. Available from: <https://tollguru.com/toll-calculator-malaysia>.
- 52 495

1  
2  
3 496 **Figure Legends and Tables**  
4

5  
6 497 Table 1 Input assumptions used to estimate the population at each stage of the patient pathways  
7

8 498 Table 2 Resources and unit costs  
9

10 499 Table 3 Annual cost of proposed practice (i.e., CRC screening programme)  
11  
12

13 500

14  
15 501 Figure 1 Patient pathways in 'usual care' practice - opportunistic screening for CRC  
16

17 502 Figure 2 Patient pathway in population-based CRC screening programme  
18

19 503 Figure 3 Results of multiple univariate sensitive analyses showing key factors that exert most  
20

21 504 influence the net budget impact  
22  
23

24 505

25  
26 506 **Supplementary material**  
27

28 507 Figure S1 Visual depiction of the budget impact cost calculator  
29

30 508 Table S1 Net budget impact of CRC screening programme over 5-year timeframe, by state  
31

32 509 Table S2 Sensitivity of the total budget impact of CRC screening programme to changes in  
33  
34

35 510 each variable individually  
36  
37  
38  
39  
40  
41  
42  
43  
44  
45  
46  
47  
48  
49  
50  
51  
52  
53  
54  
55  
56  
57  
58  
59  
60

Figure 1: Patient pathway in 'usual care' practice - opportunistic screening for CRC



**Figure 2: Patient pathway in population-based CRC screening programme**



**Figure 3: Results of multiple univariate sensitive analyses showing key factors that exert most influence the net budget impact**



Supplementary material

Figure S1: Visual depiction of the budget impact cost calculator



## Supplementary material

**Table S1: Net budget impact of CRC screening programme over 5-year timeframe, by state**

Currency: Malaysian ringgit

| State                    | Population        | Year 1             | Year 2             | Year 3             | Year 4             | Year 5             |
|--------------------------|-------------------|--------------------|--------------------|--------------------|--------------------|--------------------|
| <b>Johor</b>             | 3,822,800         | 12,597,041         | 13,791,897         | 14,986,752         | 16,181,607         | 17,376,462         |
| <b>Kedah</b>             | 2,206,200         | 7,272,541          | 7,962,112          | 8,651,682          | 9,341,252          | 10,030,823         |
| <b>Kelantan</b>          | 1,884,300         | 6,212,311          | 6,801,268          | 7,390,225          | 7,979,183          | 8,568,140          |
| <b>Melaka</b>            | 934,700           | 3,084,637          | 3,376,787          | 3,668,937          | 3,961,087          | 4,253,238          |
| <b>Negeri Sembilan</b>   | 1,141,000         | 3,764,122          | 4,120,753          | 4,477,384          | 4,834,016          | 5,190,647          |
| <b>Pahang</b>            | 1,702,900         | 5,614,833          | 6,147,092          | 6,679,351          | 7,211,609          | 7,743,868          |
| <b>Perak</b>             | 2,569,300         | 8,468,450          | 9,271,511          | 10,074,572         | 10,877,633         | 11,680,693         |
| <b>Pulau Pinang</b>      | 1,767,100         | 5,826,301          | 6,378,626          | 6,930,951          | 7,483,276          | 8,035,601          |
| <b>Sabah</b>             | 3,919,600         | 12,915,864         | 14,140,975         | 15,366,086         | 16,591,197         | 17,816,308         |
| <b>Sarawak</b>           | 2,829,400         | 9,325,144          | 10,209,501         | 11,093,859         | 11,978,217         | 12,862,575         |
| <b>Terengganu</b>        | 1,245,300         | 4,107,648          | 4,496,879          | 4,886,111          | 5,275,342          | 5,664,573          |
| <b>Perlis</b>            | 253,500           | 841,028            | 920,262            | 999,496            | 1,078,730          | 1,157,964          |
| <b>W.P. Kuala Lumpur</b> | 1,790,100         | 5,902,043          | 6,461,557          | 7,021,071          | 7,580,585          | 8,140,099          |
| <b>W.P. Labuan</b>       | 99,000            | 332,138            | 363,081            | 394,024            | 424,968            | 455,911            |
| <b>W.P. Putrajaya</b>    | 97,100            | 325,886            | 356,236            | 386,585            | 416,935            | 447,284            |
| <b>Nation-wide</b>       | <b>32,676,786</b> | <b>107,631,959</b> | <b>117,845,422</b> | <b>128,058,885</b> | <b>138,272,349</b> | <b>148,485,812</b> |

CRC: Colorectal cancer | W.P.: The Federal Territories (Malay: Wilayah Persekutuan)

Readers can convert from Malaysian Ringgit to their currency of interest (e.g., International Dollar, US Dollar, British Pound, Euro etc.) using the free web-based tool ‘CCEMG – EPPI-Centre Cost Converter’ (<https://eppi.ioe.ac.uk/costconversion/default.aspx>). This tool help adjusting estimates of cost expressed in one currency and price year to a specific target currency and price year.



## Supplementary material

*Table S2: Sensitivity of the total budget impact of CRC screening programme to changes in each variable individually*

Baseline budget impact=RM107,631,959

*Unit: Thousand Ringgit Malaysia*

|                                                                                                         | Baseline value | Min value (-20% from baseline) | Max value (+20% from baseline) | Min budget impact | Max budget impact | Change |
|---------------------------------------------------------------------------------------------------------|----------------|--------------------------------|--------------------------------|-------------------|-------------------|--------|
| Probability of adults is contactable for CRC screening programme                                        | 66%            | 53%                            | 79%                            | 86,574            | 129,818           | 43,244 |
| Probability of adults is included (eligible for CRC screening programme)                                | 77%            | 62%                            | 92%                            | 86,386            | 128,950           | 42,564 |
| Probability of adults agree to participate in CRC screening programme after being invited               | 52%            | 42%                            | 63%                            | 86,454            | 129,675           | 43,221 |
| Probability of adults needing 1st reminder                                                              | 79%            | 63%                            | 94%                            | 107,430           | 107,766           | 336    |
| Probability of adults needing 2nd reminder                                                              | 88%            | 70%                            | 100%                           | 107,535           | 107,643           | 108    |
| Probability of adults return iFOBT result                                                               | 42%            | 33%                            | 50%                            | 105,062           | 110,060           | 4,998  |
| Probability of adults with iFOBT positive result                                                        | 18%            | 14%                            | 22%                            | 105,204           | 109,988           | 4,784  |
| Probability of adults taking colonoscopy after positive iFOBT                                           | 41%            | 33%                            | 49%                            | 105,673           | 109,493           | 3,820  |
| Probability of adults with CRC detection after getting colonoscopy                                      | 4%             | 3%                             | 5%                             | 107,594           | 107,603           | 9      |
| Cost to perform the screening (asking for symptoms, family history, referral)                           | 5.58           | 4.47                           | 6.70                           | 107,633           | 107,567           | -66    |
| Cost of stool specimen processing                                                                       | 1.70           | 1.36                           | 2.04                           | 107,610           | 107,590           | -20    |
| Interpretation of results                                                                               | 2.79           | 2.23                           | 3.35                           | 107,617           | 107,583           | -34    |
| Cost to convey definitive diagnosis to patients (along with explaining treatment plan or referral etc.) | 8.37           | 6.70                           | 10.05                          | 107,597           | 107,604           | 7      |
| Contact eligible individuals - agreed to participate                                                    | 0.98           | 0.79                           | 1.18                           | 107,285           | 107,926           | 641    |
| Contact eligible individuals - rejected/excluded to participate                                         | 0.47           | 0.38                           | 0.56                           | 107,465           | 107,735           | 270    |
| iFOBT rapid test kit (only the rapid test kit itself)                                                   | 6.90           | 5.52                           | 8.28                           | 105,331           | 109,870           | 4,539  |
| Print materials (instruction leaflet, explanatory statement)                                            | 1.10           | 0.88                           | 1.32                           | 107,238           | 107,962           | 724    |
| Postage (stamp etc.)                                                                                    | 5.35           | 4.28                           | 6.42                           | 105,840           | 109,360           | 3,520  |
| Sending video through Whatapp                                                                           | 0.41           | 0.33                           | 0.50                           | 107,461           | 107,740           | 279    |
| Sending reminder text message                                                                           | 0.41           | 0.33                           | 0.50                           | 107,490           | 107,710           | 220    |
| Reminder call                                                                                           | 0.28           | 0.22                           | 0.33                           | 107,536           | 107,661           | 125    |
| Interpret the test kit result                                                                           | 1.70           | 1.36                           | 2.04                           | 107,366           | 107,832           | 466    |

Supplementary material

*Unit: Thousand Ringgit Malaysia*

|                                                                                                        | <b>Baseline value</b> | <b>Min value (-20% from baseline)</b> | <b>Max value (+20% from baseline)</b> | <b>Min budget impact</b> | <b>Max budget impact</b> | <b>Change</b> |
|--------------------------------------------------------------------------------------------------------|-----------------------|---------------------------------------|---------------------------------------|--------------------------|--------------------------|---------------|
| Sending text message informing negative result                                                         | 0.45                  | 0.36                                  | 0.54                                  | 107,550                  | 107,651                  | 101           |
| Call to inform positive result                                                                         | 0.41                  | 0.33                                  | 0.50                                  | 107,590                  | 107,611                  | 21            |
| Prepare and send referral letter                                                                       | 1.12                  | 0.90                                  | 1.35                                  | 107,573                  | 107,628                  | 55            |
| Follow up effort                                                                                       | 6.73                  | 5.39                                  | 8.08                                  | 107,503                  | 107,698                  | 195           |
| Colonoscopy                                                                                            | 200                   | 160                                   | 240                                   | 105,638                  | 109,564                  | 3,926         |
| Consumables – stool container, gloves, mask, plastic waste bag and disposal of materials from the test | 10.80                 | 8.64                                  | 12.96                                 | 93,612                   | 121,641                  | 28,029        |

1  
2  
3  
4  
5  
6  
7  
8  
9  
10  
11  
12  
13  
14  
15  
16  
17  
18  
19  
20  
21  
22  
23  
24  
25  
26  
27  
28  
29  
30  
31  
32  
33  
34  
35  
36  
37  
38  
39  
40  
41  
42  
43  
44  
45  
46

ISPOR—The Professional Society for Health Economics and Outcomes Research

## Budget Impact Analysis—Principles of Good Practice: Report of the ISPOR 2012 Budget Impact Analysis Good Practice II Task Force

Citation: Sullivan SD, Mauskopf JA, Augustovski F, Jaime Caro J, Lee KM, Minchin M, Orlewska E, Penna P, Rodriguez Barrios JM, Shau WY. Budget impact analysis-principles of good practice: report of the ISPOR 2012 Budget Impact Analysis Good Practice II Task Force. Value Health. 2014 Jan-Feb;17(1):5-14. doi: <https://doi.org/10.1016/j.jval.2013.08.2291>

### Recommendations for Reporting Format

| Section/topic                                 | Guidance for reporting                                                                                                                                                                                                 | Reported in section                                                                          |
|-----------------------------------------------|------------------------------------------------------------------------------------------------------------------------------------------------------------------------------------------------------------------------|----------------------------------------------------------------------------------------------|
| <b>Introduction</b>                           |                                                                                                                                                                                                                        |                                                                                              |
| Objectives                                    | The objective of the BIA should be clearly stated and tied to the study perspectives                                                                                                                                   | Introduction                                                                                 |
| Epidemiology and management of health problem | Present information about the prevalence and incidence of the particular disease, disease severity, disease progression, undiagnosed or undertreated cases, and risk factors pertinent to estimating the budget impact | Introduction                                                                                 |
| Clinical impact                               | Consist of a brief description of the eligible population and existing management options and their efficacy and safety that are relevant to the design of the study of the BIA                                        | Introduction                                                                                 |
| Economic impact                               | Include a brief description of previous BIAs in the condition of interest for another intervention and condition-specific treatment patterns and cost-of-care studies                                                  | Not applicable (No previous BIA)                                                             |
| <b>Study Design and Methods</b>               |                                                                                                                                                                                                                        |                                                                                              |
| Patient population                            | Specify the eligible population for the new intervention                                                                                                                                                               | Methods<br>Sub-section: Eligible population and input assumptions<br>Table 1                 |
| Intervention mix                              | Contain a detailed description of the use and characteristics of each intervention in the current intervention mix and in the expected intervention mix after the introduction of the new intervention                 | Methods<br>Sub-section: Health service under assessment and its comparator<br>Figure 1 and 2 |
| Time horizon                                  | Should be presented and the choice(s) justified                                                                                                                                                                        | Methods<br>Sub-section: Perspective and time horizon                                         |
| Perspective                                   | Identify the BIAs' perspective(s), the cost categories included, and the intended audience                                                                                                                             | Methods<br>Perspective and time horizon                                                      |

## ISPOR—The Professional Society for Health Economics and Outcomes Research

| Section/topic                           | Guidance for reporting                                                                                                                                                                                                                                                                                                                                                                                          | Reported in section                                                                             |
|-----------------------------------------|-----------------------------------------------------------------------------------------------------------------------------------------------------------------------------------------------------------------------------------------------------------------------------------------------------------------------------------------------------------------------------------------------------------------|-------------------------------------------------------------------------------------------------|
| Analytic framework description          | Complete description of the structure of the BIA cost calculator or condition-specific cohort or individual simulation model                                                                                                                                                                                                                                                                                    | Methods<br>Sub-section: Eligible population and input assumptions                               |
| Input data                              | Input values used for the reported analyses, including alternative scenarios, should be presented                                                                                                                                                                                                                                                                                                               | Methods<br>Sub-section: Cost input and data sources<br>Table 2                                  |
| Data sources                            | The sources of data inputs should be described in detail                                                                                                                                                                                                                                                                                                                                                        | Methods<br>Sub-section: Cost input and data sources<br>Table 2                                  |
| Data collection                         | The methods and processes for any primary data collection and data abstraction tasks not reported elsewhere should be described and explained.                                                                                                                                                                                                                                                                  | Not applicable (secondary data)                                                                 |
| Analyses                                | A description of the calculations used to complete the BIA should be provided. The choice of all the scenarios presented in the results should be documented and justified.                                                                                                                                                                                                                                     | Methods<br>Sub-section: Computing framework and base-case analysis under budget impact analyses |
| Uncertainty                             | Uncertainty analysis methods should be described and justified                                                                                                                                                                                                                                                                                                                                                  | Methods<br>Sub-sections:<br>Uncertainty and scenario analyses under budget impact analyses      |
| <b>Results</b>                          | The budget impact should be presented for each budget period over the time horizon. Both budget period resource use and costs should be presented. The estimates of resource use should be listed in a table that shows the change in use for each time period reported in the BIA<br><br>The results of the uncertainty analyses and scenarios analyzed should be described and presented in figures or tables | Results<br>Table 3<br><br>Results<br>Figure 2                                                   |
| <b>Conclusions and Limitations</b>      | State the main conclusions on the basis of the results of the BIA.<br>Report the main limitations regarding key issues such as design aspects including off-label use and adherence assumptions and the completeness and quality of data inputs and sources.                                                                                                                                                    | Discussion<br><br>Conclusion                                                                    |
| <b>Inclusion of Graphics and Tables</b> |                                                                                                                                                                                                                                                                                                                                                                                                                 |                                                                                                 |
| Figure of the analytical framework      | Flow diagrams or other visual depictions of the cost calculator or condition-specific cohort or individual simulation model are recommended to be included with the analytical framework description.                                                                                                                                                                                                           | Supplementary material<br>Figure S1                                                             |

## ISPOR—The Professional Society for Health Economics and Outcomes Research

| Section/topic                                    | Guidance for reporting                                                                                                                                                                                                          | Reported in section |
|--------------------------------------------------|---------------------------------------------------------------------------------------------------------------------------------------------------------------------------------------------------------------------------------|---------------------|
| Table of assumptions                             | All the major assumptions should be listed in a tabular form                                                                                                                                                                    | Table 1             |
| Tables of inputs                                 | All the input parameter values and their data sources and derivations should be presented in a tabular form                                                                                                                     | Table 2             |
| Tables of outputs                                | All outputs should be presented in a tabular and/or graphical Form                                                                                                                                                              | Table 3             |
| Schematic representation of uncertainty analyses | Diagrams such as Tornado diagrams should be included along with the text on the results of the scenario analyses                                                                                                                | Figure 3            |
| Appendices and References                        | The appendices may cover literature search strategies, evidence summaries, intermediate results (e.g., of individual Delphi panel rounds), and the names and addresses of participating experts and investigators, for example. | Reference           |

## CHEERS 2022 Checklist

| Topic                                | No. | Item                                                                                                                            | Location where item is reported      |
|--------------------------------------|-----|---------------------------------------------------------------------------------------------------------------------------------|--------------------------------------|
| <b>Title</b>                         |     |                                                                                                                                 |                                      |
|                                      | 1   | Identify the study as an economic evaluation and specify the interventions being compared.                                      | Title page, Page 1                   |
| <b>Abstract</b>                      |     |                                                                                                                                 |                                      |
|                                      | 2   | Provide a structured summary that highlights context, key methods, results, and alternative analyses.                           | Abstract, Page 1                     |
| <b>Introduction</b>                  |     |                                                                                                                                 |                                      |
| <b>Background and objectives</b>     | 3   | Give the context for the study, the study question, and its practical relevance for decision making in policy or practice.      | Introduction, Line 65-69             |
| <b>Methods</b>                       |     |                                                                                                                                 |                                      |
| <b>Health economic analysis plan</b> | 4   | Indicate whether a health economic analysis plan was developed and where available.                                             | Not applicable                       |
| <b>Study population</b>              | 5   | Describe characteristics of the study population (such as age range, demographics, socioeconomic, or clinical characteristics). | Methods, Line 123-152, Table 1       |
| <b>Setting and location</b>          | 6   | Provide relevant contextual information that may influence findings.                                                            | Methods, Line 79-92                  |
| <b>Comparators</b>                   | 7   | Describe the interventions or strategies being compared and why chosen.                                                         | Methods, Line 79-121, Figure 1 and 2 |
| <b>Perspective</b>                   | 8   | State the perspective(s) adopted by the study and why chosen.                                                                   | Methods, Line 199-202                |
| <b>Time horizon</b>                  | 9   | State the time horizon for the study and why appropriate.                                                                       | Methods, Line 204-205                |
| <b>Discount rate</b>                 | 10  | Report the discount rate(s) and reason chosen.                                                                                  | Methods, Line 205-206                |
| <b>Selection of outcomes</b>         | 11  | Describe what outcomes were used as the measure(s) of benefit(s) and harm(s).                                                   | Not applicable                       |

| Topic                                                                        | No. | Item                                                                                                                                                                          | Location where item is reported                           |
|------------------------------------------------------------------------------|-----|-------------------------------------------------------------------------------------------------------------------------------------------------------------------------------|-----------------------------------------------------------|
| <b>Measurement of outcomes</b>                                               | 12  | Describe how outcomes used to capture benefit(s) and harm(s) were measured.                                                                                                   | Not applicable                                            |
| <b>Valuation of outcomes</b>                                                 | 13  | Describe the population and methods used to measure and value outcomes.                                                                                                       | Not applicable                                            |
| <b>Measurement and valuation of resources and costs</b>                      | 14  | Describe how costs were valued.                                                                                                                                               | Methods, Line 159-196                                     |
| <b>Currency, price date, and conversion</b>                                  | 15  | Report the dates of the estimated resource quantities and unit costs, plus the currency and year of conversion.                                                               | Methods, Line 73-76                                       |
| <b>Rationale and description of model</b>                                    | 16  | If modelling is used, describe in detail and why used. Report if the model is publicly available and where it can be accessed.                                                | Not applicable                                            |
| <b>Analytics and assumptions</b>                                             | 17  | Describe any methods for analysing or statistically transforming data, any extrapolation methods, and approaches for validating any model used.                               | Methods, Line 211-221, Figure S1 (Supplementary Material) |
| <b>Characterising heterogeneity</b>                                          | 18  | Describe any methods used for estimating how the results of the study vary for subgroups.                                                                                     | Not applicable                                            |
| <b>Characterising distributional effects</b>                                 | 19  | Describe how impacts are distributed across different individuals or adjustments made to reflect priority populations.                                                        | Not applicable                                            |
| <b>Characterising uncertainty</b>                                            | 20  | Describe methods to characterise any sources of uncertainty in the analysis.                                                                                                  | Methods, Line 224-229, Figure S2 (Supplementary Material) |
| <b>Approach to engagement with patients and others affected by the study</b> | 21  | Describe any approaches to engage patients or service recipients, the general public, communities, or stakeholders (such as clinicians or payers) in the design of the study. | Methods, Line 233-235                                     |
| <b>Results</b>                                                               |     |                                                                                                                                                                               |                                                           |
| <b>Study parameters</b>                                                      | 22  | Report all analytic inputs (such as values, ranges, references) including uncertainty or distributional assumptions.                                                          | Table 1 and 2, Table S2 (Supplementary Material)          |
| <b>Summary of main results</b>                                               | 23  | Report the mean values for the main categories of costs and outcomes of interest and summarise them in the most appropriate overall measure.                                  | Results, Line 239-274, Table 3                            |

| Topic                                                                       | No. | Item                                                                                                                                                                     | Location where item is reported |
|-----------------------------------------------------------------------------|-----|--------------------------------------------------------------------------------------------------------------------------------------------------------------------------|---------------------------------|
| <b>Effect of uncertainty</b>                                                | 24  | Describe how uncertainty about analytic judgments, inputs, or projections affect findings. Report the effect of choice of discount rate and time horizon, if applicable. | Results, Line 277-295, Figure 3 |
| <b>Effect of engagement with patients and others affected by the study</b>  | 25  | Report on any difference patient/service recipient, general public, community, or stakeholder involvement made to the approach or findings of the study                  | Not applicable                  |
| <b>Discussion</b>                                                           |     |                                                                                                                                                                          |                                 |
| <b>Study findings, limitations, generalisability, and current knowledge</b> | 26  | Report key findings, limitations, ethical or equity considerations not captured, and how these could affect patients, policy, or practice.                               | Discussion                      |
| <b>Other relevant information</b>                                           |     |                                                                                                                                                                          |                                 |
| <b>Source of funding</b>                                                    | 27  | Describe how the study was funded and any role of the funder in the identification, design, conduct, and reporting of the analysis                                       | End of manuscript               |
| <b>Conflicts of interest</b>                                                | 28  | Report authors conflicts of interest according to journal or International Committee of Medical Journal Editors requirements.                                            | End of manuscript               |

*From:* Husereau D, Drummond M, Augustovski F, et al. Consolidated Health Economic Evaluation Reporting Standards 2022 (CHEERS 2022) Explanation and Elaboration: A Report of the ISPOR CHEERS II Good Practices Task Force. Value Health 2022;25. doi:10.1016/j.jval.2021.10.008
