# Supplementary material for: Budget impact analysis of a home-based colorectal cancer screening programme in Malaysia
Source: PubMed Central journal article supplement (PMC10032398; doi:10.1136/bmjopen-2022-066925), 2023-03-21
Supplement: bmjopen-2022-066925supp001.pdf [file bmjopen-2022-066925supp001.pdf]

## Supplementary material

*Figure S1: Visual depiction of the budget impact cost calculator*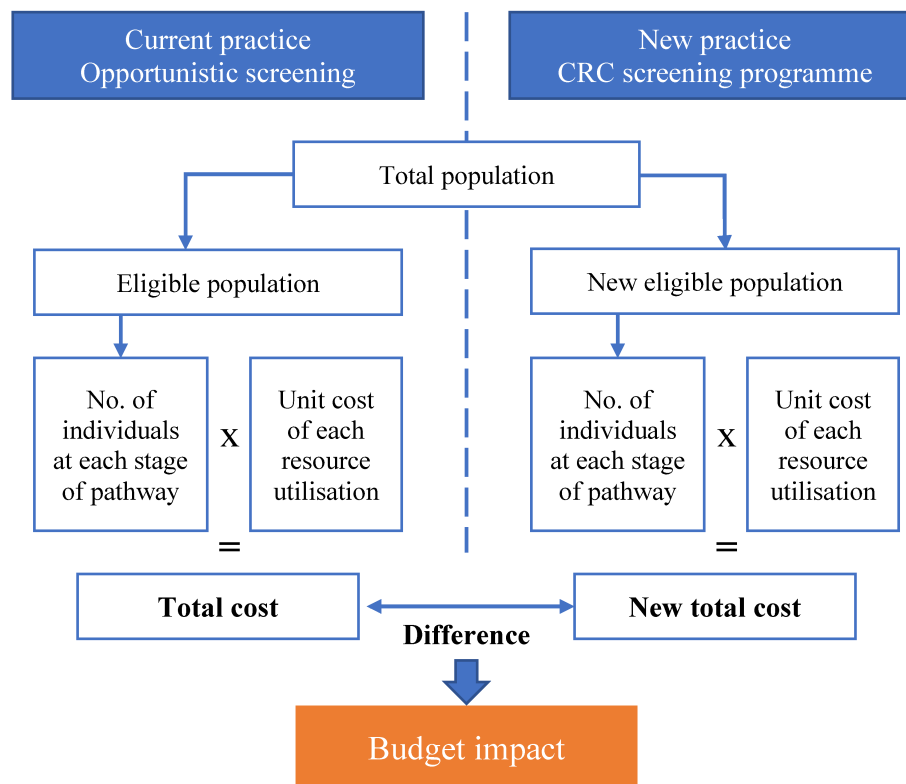

## Supplementary material

**Table S1: Net budget impact of CRC screening programme over 5-year timeframe, by state**

Currency: Malaysian ringgit

| State                    | Population        | Year 1             | Year 2             | Year 3             | Year 4             | Year 5             |
|--------------------------|-------------------|--------------------|--------------------|--------------------|--------------------|--------------------|
| <b>Johor</b>             | 3,822,800         | 12,597,041         | 13,791,897         | 14,986,752         | 16,181,607         | 17,376,462         |
| <b>Kedah</b>             | 2,206,200         | 7,272,541          | 7,962,112          | 8,651,682          | 9,341,252          | 10,030,823         |
| <b>Kelantan</b>          | 1,884,300         | 6,212,311          | 6,801,268          | 7,390,225          | 7,979,183          | 8,568,140          |
| <b>Melaka</b>            | 934,700           | 3,084,637          | 3,376,787          | 3,668,937          | 3,961,087          | 4,253,238          |
| <b>Negeri Sembilan</b>   | 1,141,000         | 3,764,122          | 4,120,753          | 4,477,384          | 4,834,016          | 5,190,647          |
| <b>Pahang</b>            | 1,702,900         | 5,614,833          | 6,147,092          | 6,679,351          | 7,211,609          | 7,743,868          |
| <b>Perak</b>             | 2,569,300         | 8,468,450          | 9,271,511          | 10,074,572         | 10,877,633         | 11,680,693         |
| <b>Pulau Pinang</b>      | 1,767,100         | 5,826,301          | 6,378,626          | 6,930,951          | 7,483,276          | 8,035,601          |
| <b>Sabah</b>             | 3,919,600         | 12,915,864         | 14,140,975         | 15,366,086         | 16,591,197         | 17,816,308         |
| <b>Sarawak</b>           | 2,829,400         | 9,325,144          | 10,209,501         | 11,093,859         | 11,978,217         | 12,862,575         |
| <b>Terengganu</b>        | 1,245,300         | 4,107,648          | 4,496,879          | 4,886,111          | 5,275,342          | 5,664,573          |
| <b>Perlis</b>            | 253,500           | 841,028            | 920,262            | 999,496            | 1,078,730          | 1,157,964          |
| <b>W.P. Kuala Lumpur</b> | 1,790,100         | 5,902,043          | 6,461,557          | 7,021,071          | 7,580,585          | 8,140,099          |
| <b>W.P. Labuan</b>       | 99,000            | 332,138            | 363,081            | 394,024            | 424,968            | 455,911            |
| <b>W.P. Putrajaya</b>    | 97,100            | 325,886            | 356,236            | 386,585            | 416,935            | 447,284            |
| <b>Nation-wide</b>       | <b>32,676,786</b> | <b>107,631,959</b> | <b>117,845,422</b> | <b>128,058,885</b> | <b>138,272,349</b> | <b>148,485,812</b> |

CRC: Colorectal cancer | W.P.: The Federal Territories (Malay: Wilayah Persekutuan)

Readers can convert from Malaysian Ringgit to their currency of interest (e.g., International Dollar, US Dollar, British Pound, Euro etc.) using the free web-based tool ‘CCEMG – EPPI-Centre Cost Converter’ (<https://epi.ioe.ac.uk/costconversion/default.aspx>). This tool help adjusting estimates of cost expressed in one currency and price year to a specific target currency and price year.

## Supplementary material

**Table S2: Sensitivity of the total budget impact of CRC screening programme to changes in each variable individually**

Baseline budget impact=RM107,631,959

**Unit: Thousand Ringgit Malaysia**

|                                                                                                         | Baseline value | Min value (-20% from baseline) | Max value (+20% from baseline) | Min budget impact | Max budget impact | Change |
|---------------------------------------------------------------------------------------------------------|----------------|--------------------------------|--------------------------------|-------------------|-------------------|--------|
| Probability of adults is contactable for CRC screening programme                                        | 66%            | 53%                            | 79%                            | 86,574            | 129,818           | 43,244 |
| Probability of adults is included (eligible for CRC screening programme)                                | 77%            | 62%                            | 92%                            | 86,386            | 128,950           | 42,564 |
| Probability of adults agree to participate in CRC screening programme after being invited               | 52%            | 42%                            | 63%                            | 86,454            | 129,675           | 43,221 |
| Probability of adults needing 1st reminder                                                              | 79%            | 63%                            | 94%                            | 107,430           | 107,766           | 336    |
| Probability of adults needing 2nd reminder                                                              | 88%            | 70%                            | 100%                           | 107,535           | 107,643           | 108    |
| Probability of adults return iFOBT result                                                               | 42%            | 33%                            | 50%                            | 105,062           | 110,060           | 4,998  |
| Probability of adults with iFOBT positive result                                                        | 18%            | 14%                            | 22%                            | 105,204           | 109,988           | 4,784  |
| Probability of adults taking colonoscopy after positive iFOBT                                           | 41%            | 33%                            | 49%                            | 105,673           | 109,493           | 3,820  |
| Probability of adults with CRC detection after getting colonoscopy                                      | 4%             | 3%                             | 5%                             | 107,594           | 107,603           | 9      |
| Cost to perform the screening (asking for symptoms, family history, referral)                           | 5.58           | 4.47                           | 6.70                           | 107,633           | 107,567           | -66    |
| Cost of stool specimen processing                                                                       | 1.70           | 1.36                           | 2.04                           | 107,610           | 107,590           | -20    |
| Interpretation of results                                                                               | 2.79           | 2.23                           | 3.35                           | 107,617           | 107,583           | -34    |
| Cost to convey definitive diagnosis to patients (along with explaining treatment plan or referral etc.) | 8.37           | 6.70                           | 10.05                          | 107,597           | 107,604           | 7      |
| Contact eligible individuals - agreed to participate                                                    | 0.98           | 0.79                           | 1.18                           | 107,285           | 107,926           | 641    |
| Contact eligible individuals - rejected/excluded to participate                                         | 0.47           | 0.38                           | 0.56                           | 107,465           | 107,735           | 270    |
| iFOBT rapid test kit (only the rapid test kit itself)                                                   | 6.90           | 5.52                           | 8.28                           | 105,331           | 109,870           | 4,539  |
| Print materials (instruction leaflet, explanatory statement)                                            | 1.10           | 0.88                           | 1.32                           | 107,238           | 107,962           | 724    |
| Postage (stamp etc.)                                                                                    | 5.35           | 4.28                           | 6.42                           | 105,840           | 109,360           | 3,520  |
| Sending video through Whatapp                                                                           | 0.41           | 0.33                           | 0.50                           | 107,461           | 107,740           | 279    |
| Sending reminder text message                                                                           | 0.41           | 0.33                           | 0.50                           | 107,490           | 107,710           | 220    |
| Reminder call                                                                                           | 0.28           | 0.22                           | 0.33                           | 107,536           | 107,661           | 125    |
| Interpret the test kit result                                                                           | 1.70           | 1.36                           | 2.04                           | 107,366           | 107,832           | 466    |

## Supplementary material

*Unit: Thousand Ringgit Malaysia*

|                                                                                                        | <b>Baseline value</b> | <b>Min value (-20% from baseline)</b> | <b>Max value (+20% from baseline)</b> | <b>Min budget impact</b> | <b>Max budget impact</b> | <b>Change</b> |
|--------------------------------------------------------------------------------------------------------|-----------------------|---------------------------------------|---------------------------------------|--------------------------|--------------------------|---------------|
| Sending text message informing negative result                                                         | 0.45                  | 0.36                                  | 0.54                                  | 107,550                  | 107,651                  | 101           |
| Call to inform positive result                                                                         | 0.41                  | 0.33                                  | 0.50                                  | 107,590                  | 107,611                  | 21            |
| Prepare and send referral letter                                                                       | 1.12                  | 0.90                                  | 1.35                                  | 107,573                  | 107,628                  | 55            |
| Follow up effort                                                                                       | 6.73                  | 5.39                                  | 8.08                                  | 107,503                  | 107,698                  | 195           |
| Colonoscopy                                                                                            | 200                   | 160                                   | 240                                   | 105,638                  | 109,564                  | 3,926         |
| Consumables – stool container, gloves, mask, plastic waste bag and disposal of materials from the test | 10.80                 | 8.64                                  | 12.96                                 | 93,612                   | 121,641                  | 28,029        |
